# Supplementary material for: UPLC-MSE Profiling of Phytoplankton Metabolites: Application to the Identification of Pigments and Structural Analysis of Metabolites in Porphyridium purpureum
Source: Mar Drugs. 2015 Apr 22;13(4):2541–58. doi: 10.3390/md13042541 (PMC4413225; doi:10.3390/md13042541)
Supplement: Supplementary File 1 [file marinedrugs-13-02541-s001.pdf]

## Supplementary Information

### 19-Butanoyl-Fucoxanthin

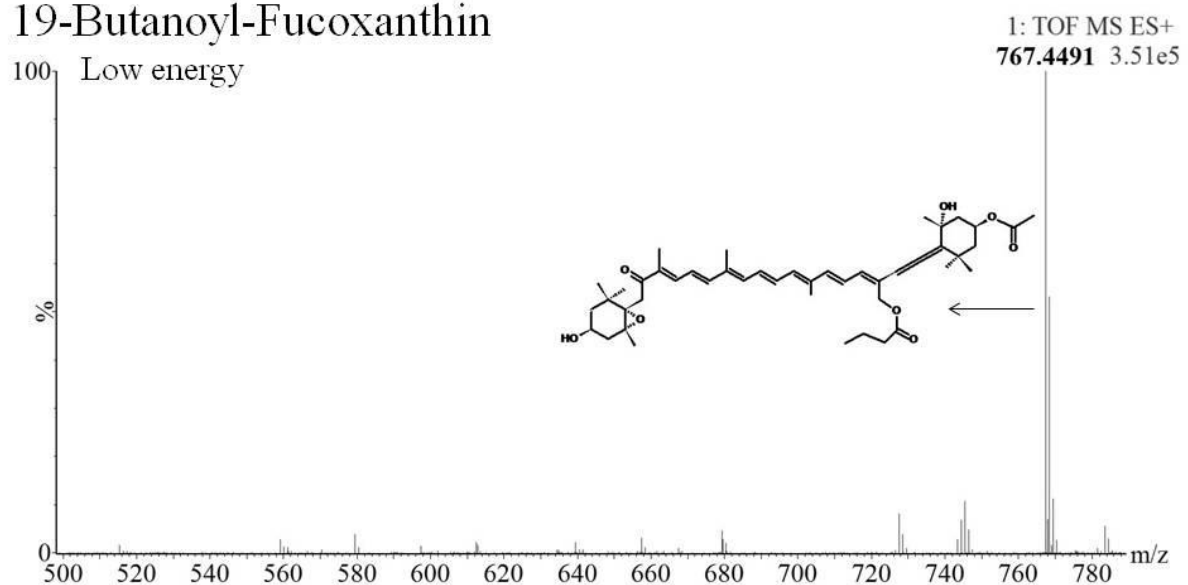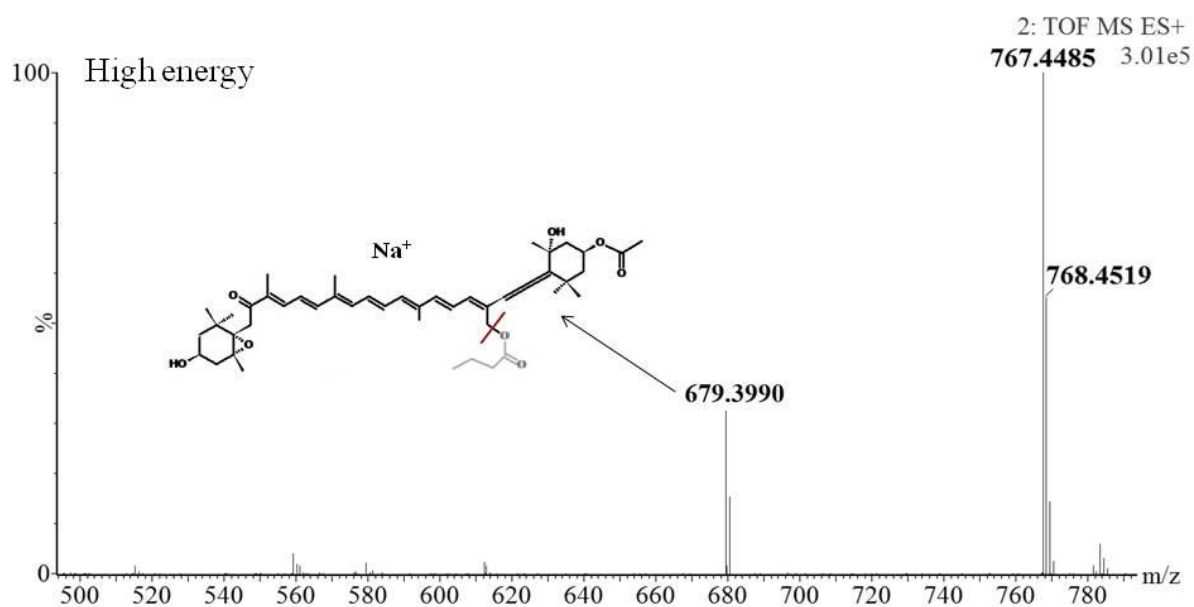

Figure S1. Cont.

## 19-Hexanoyl-Fucooxanthin

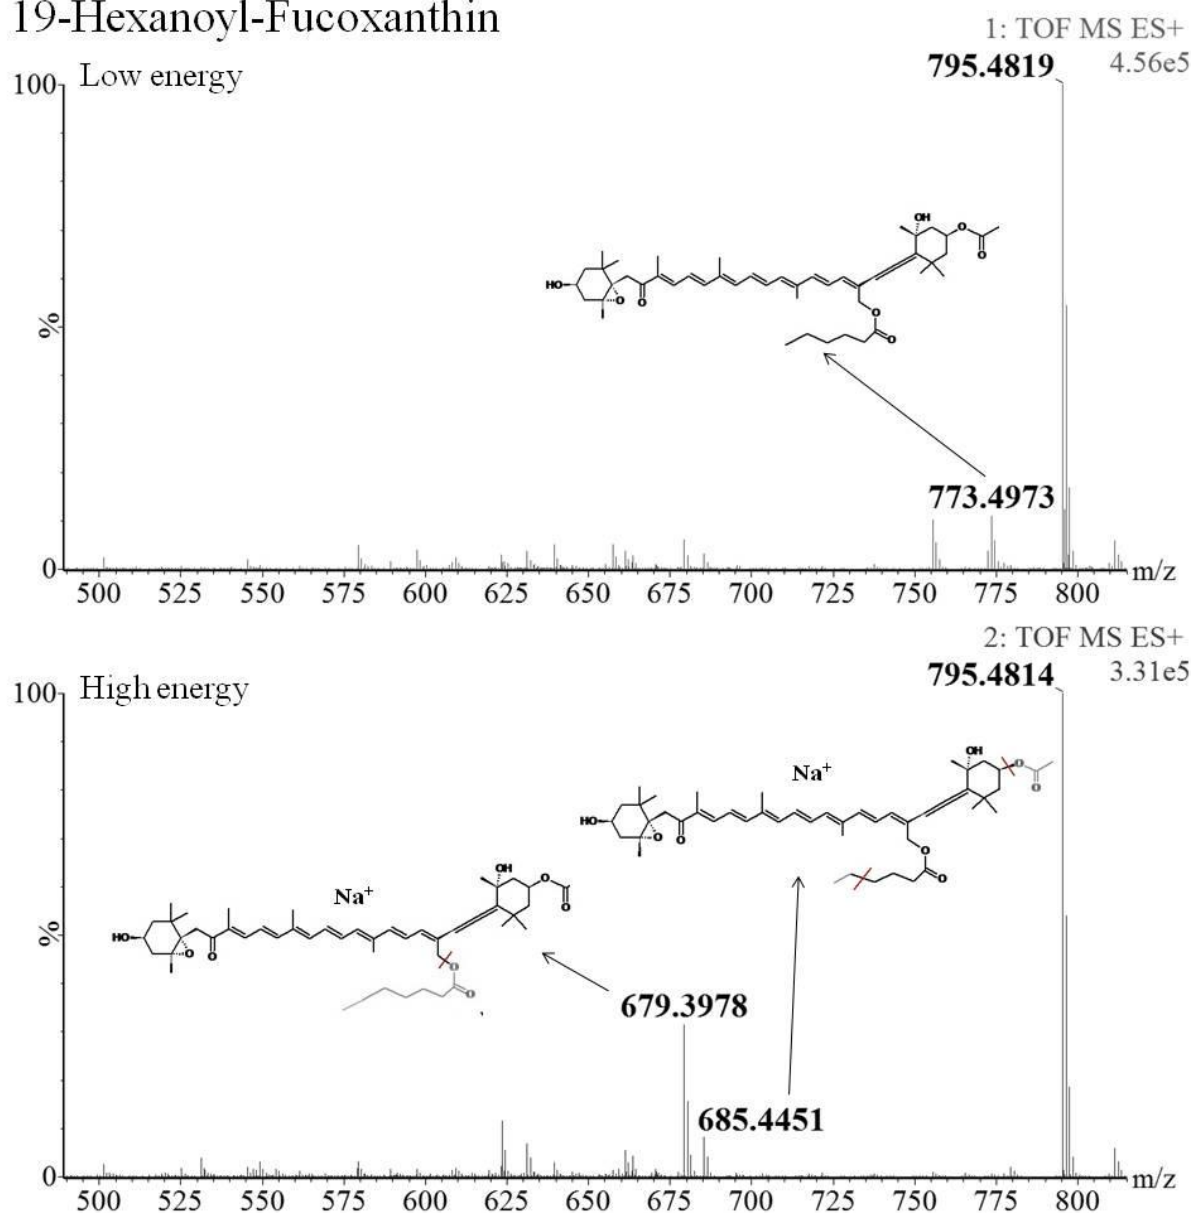

Figure S1. Cont.

## Alloxanthin

1: TOF MS ES+  
1.39e6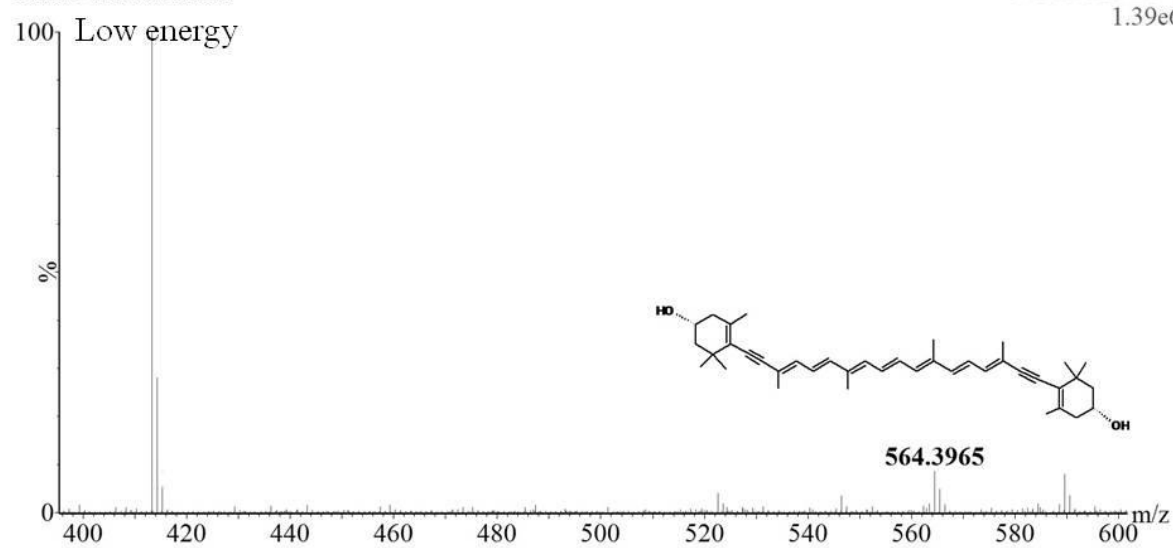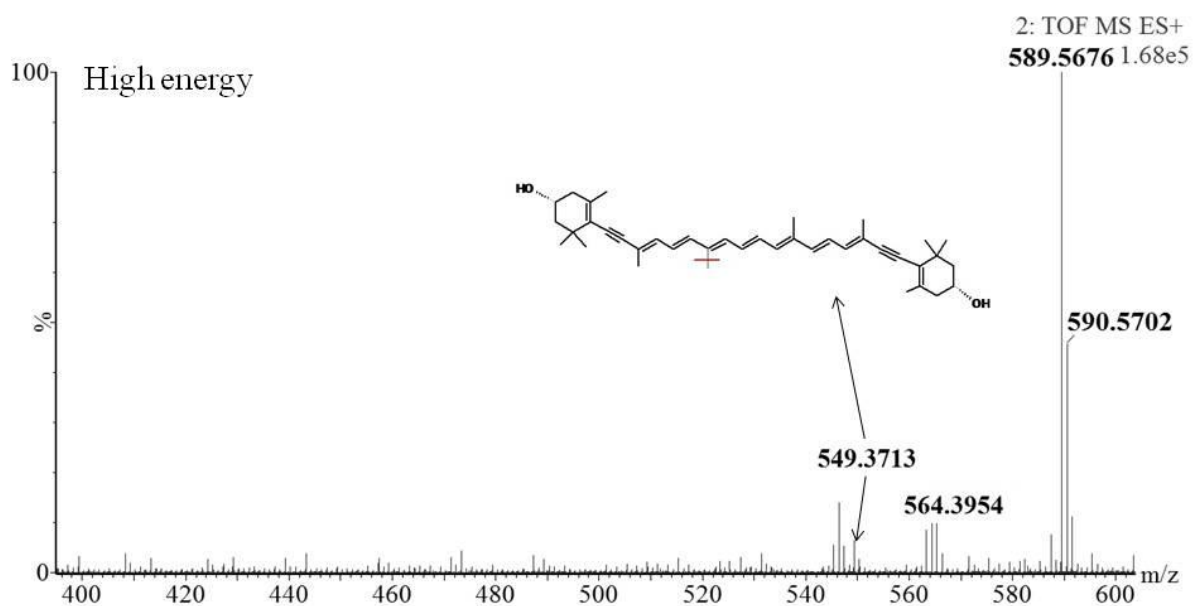

Figure S1. Cont.

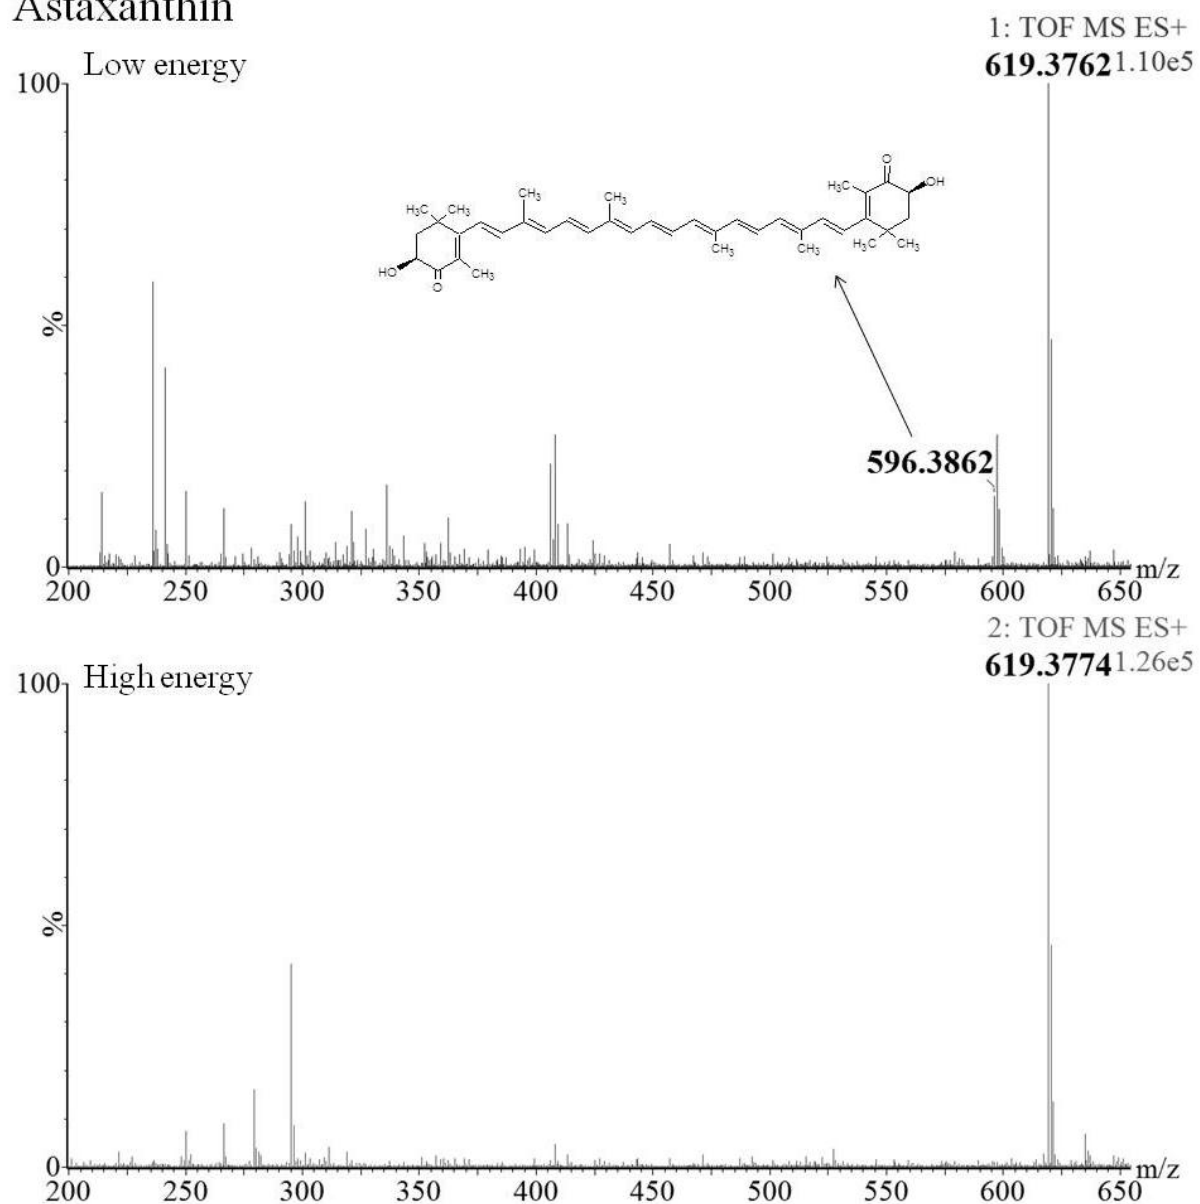

**Figure S1. Cont.**

$\beta$ -Carotene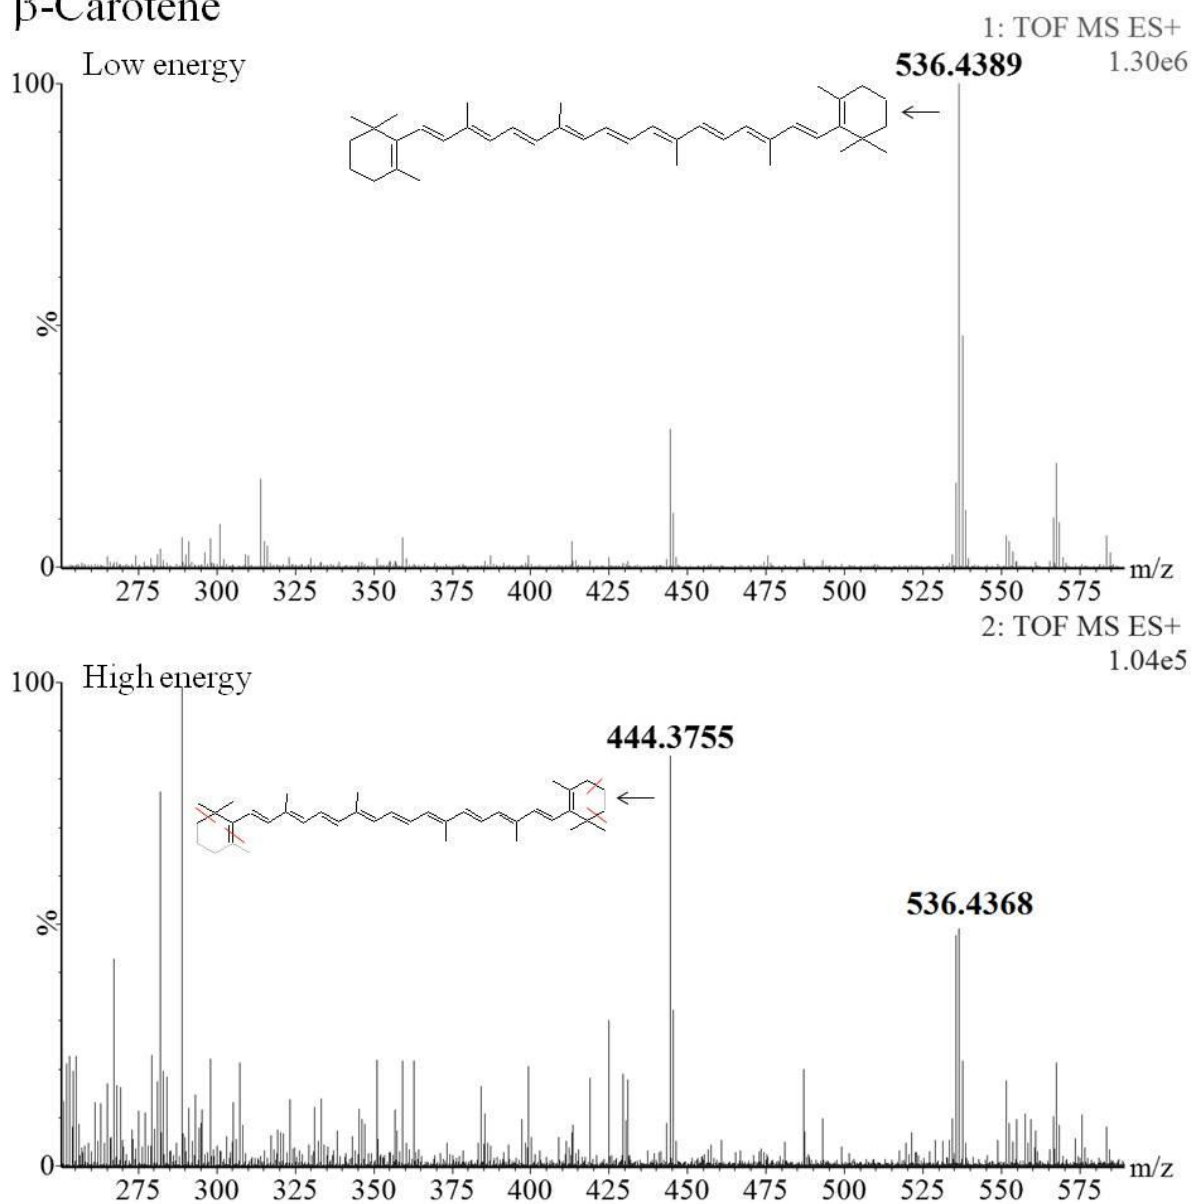

Figure S1. Cont.

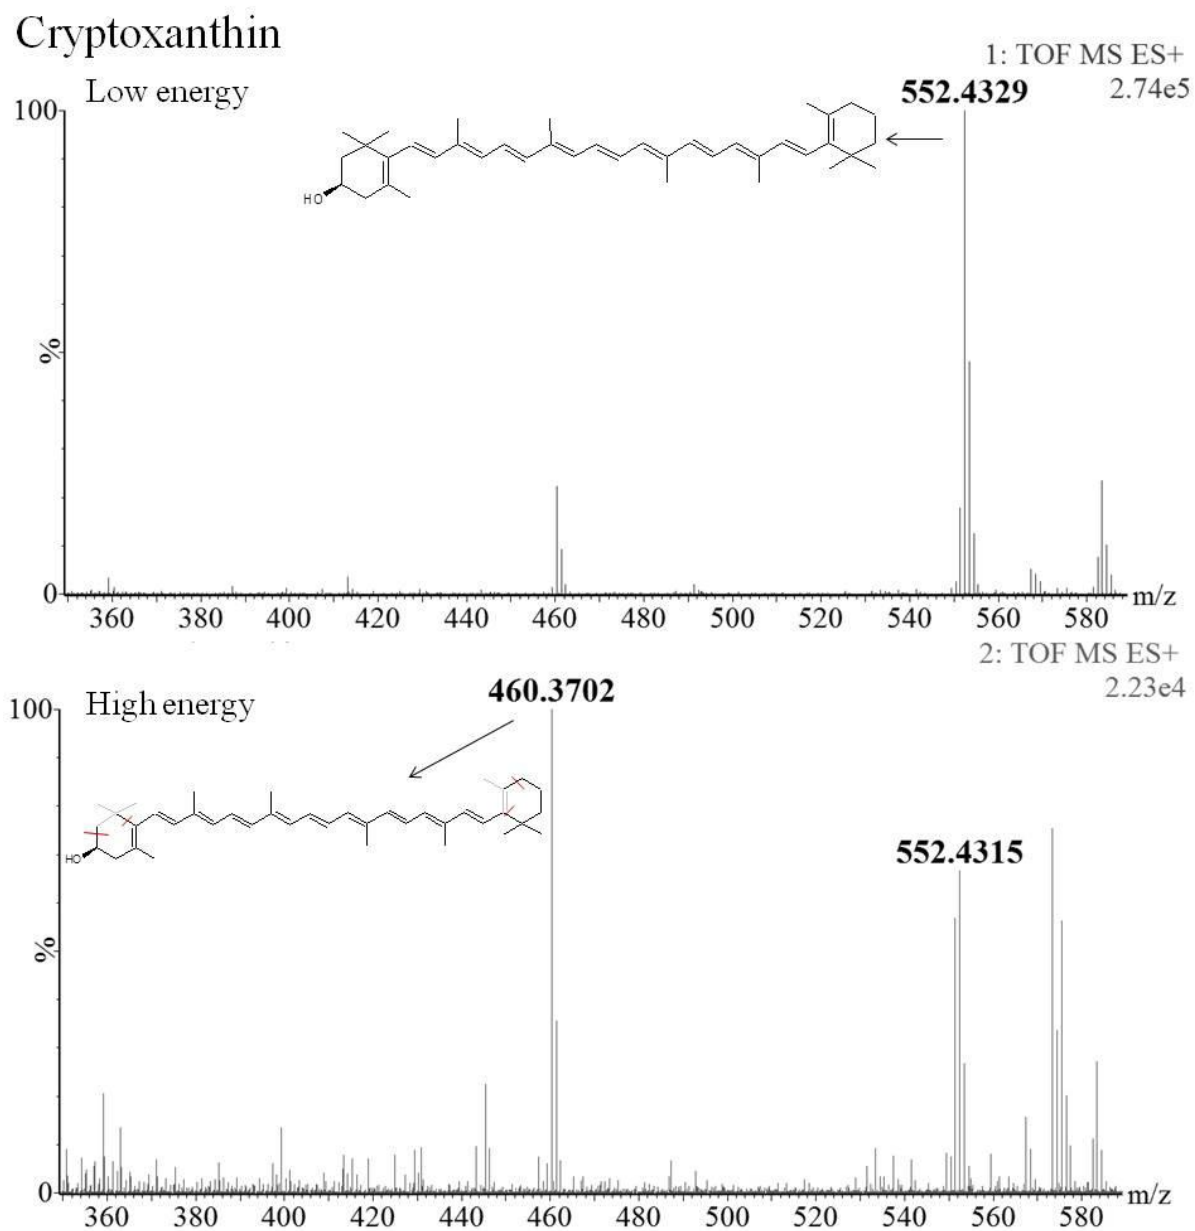

## Chlorophyll a Rt 5.28

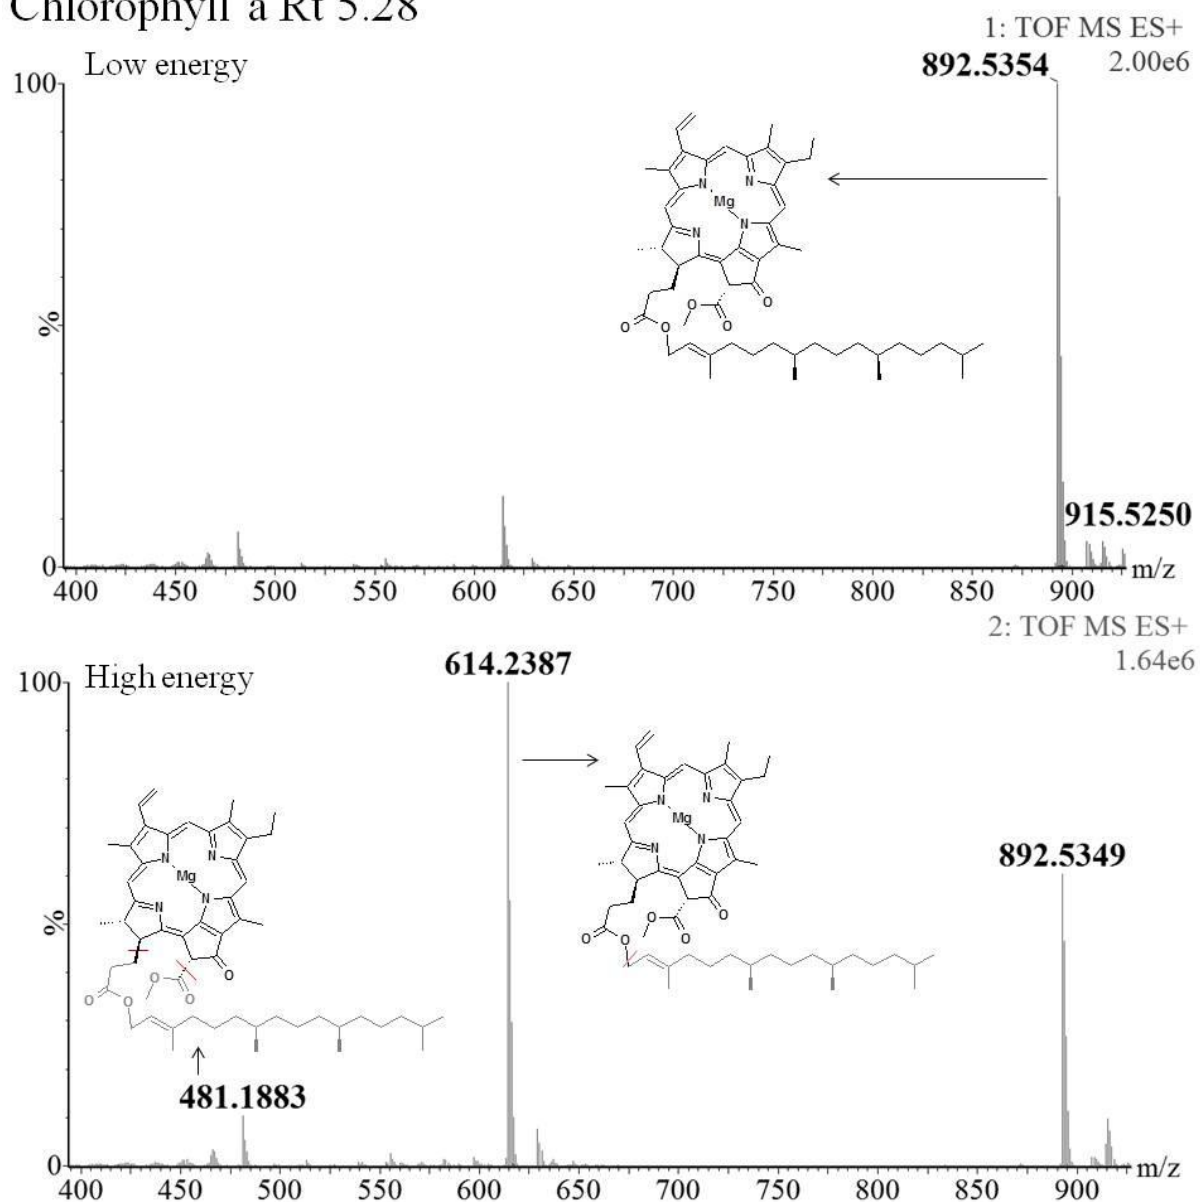

Figure S1. Cont.

## Chlorophyll a Rt 5.48

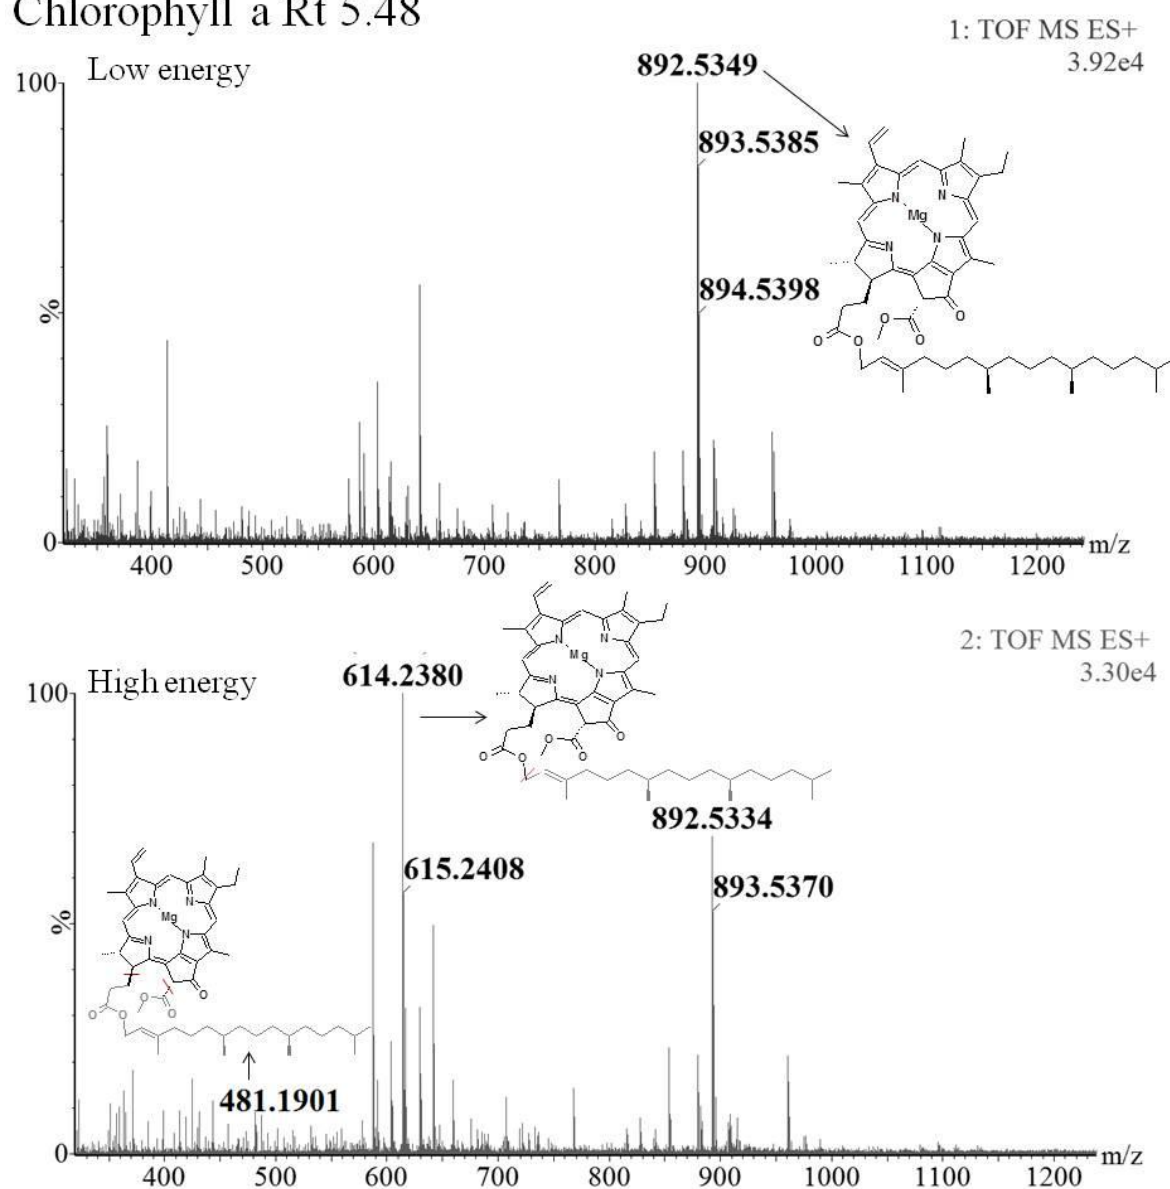

Figure S1. Cont.

## Chlorophyll b

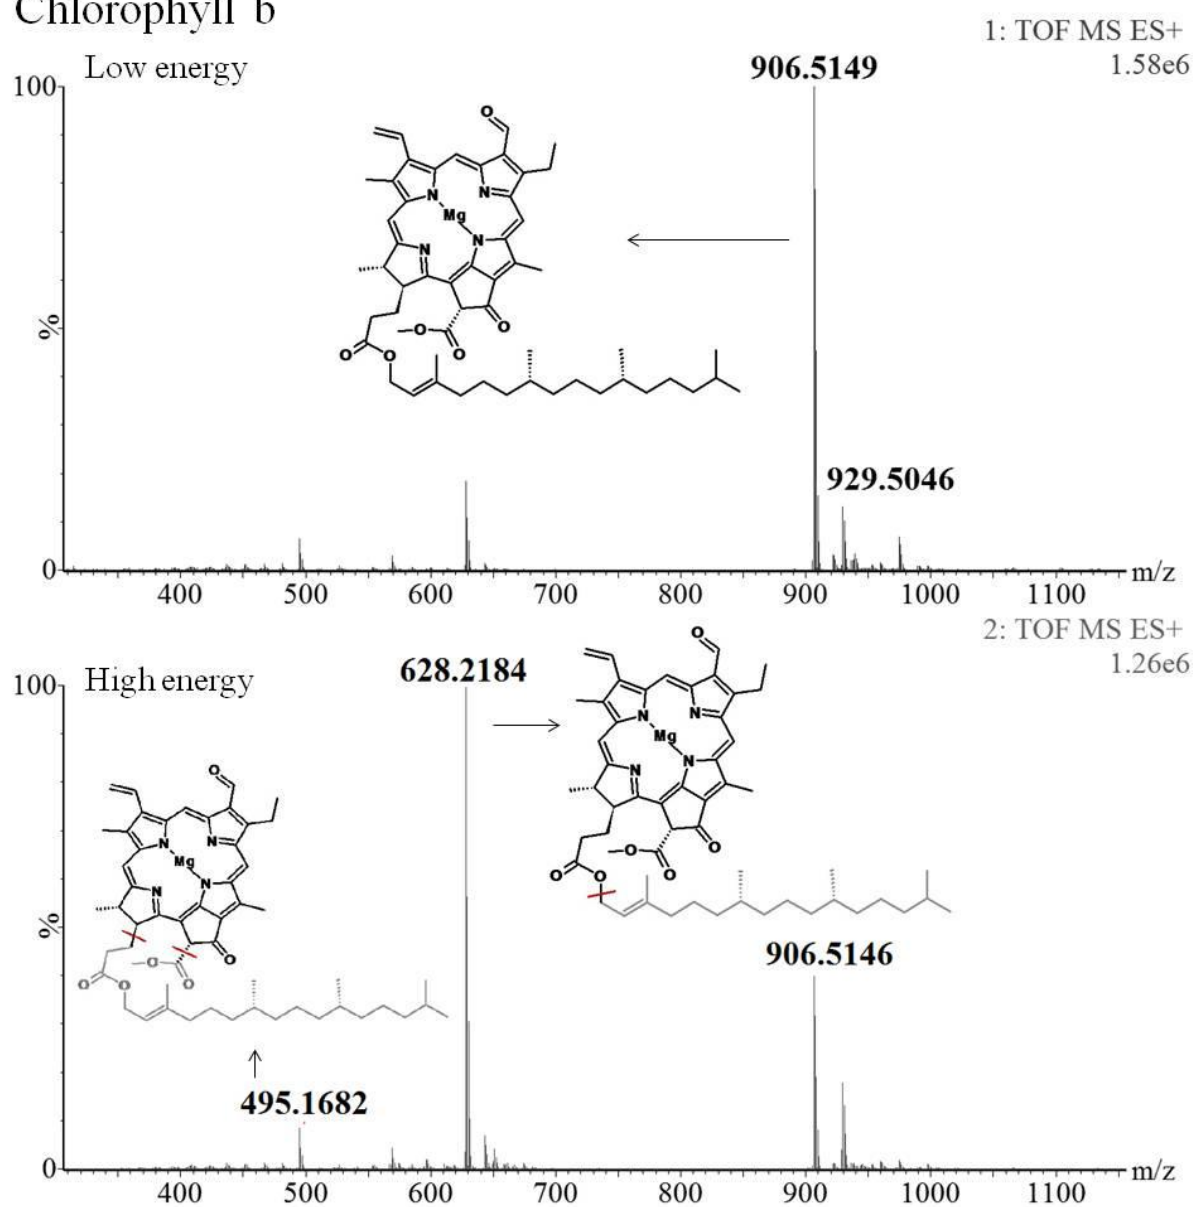

Figure S1. Cont.

## Chlorophyll c2

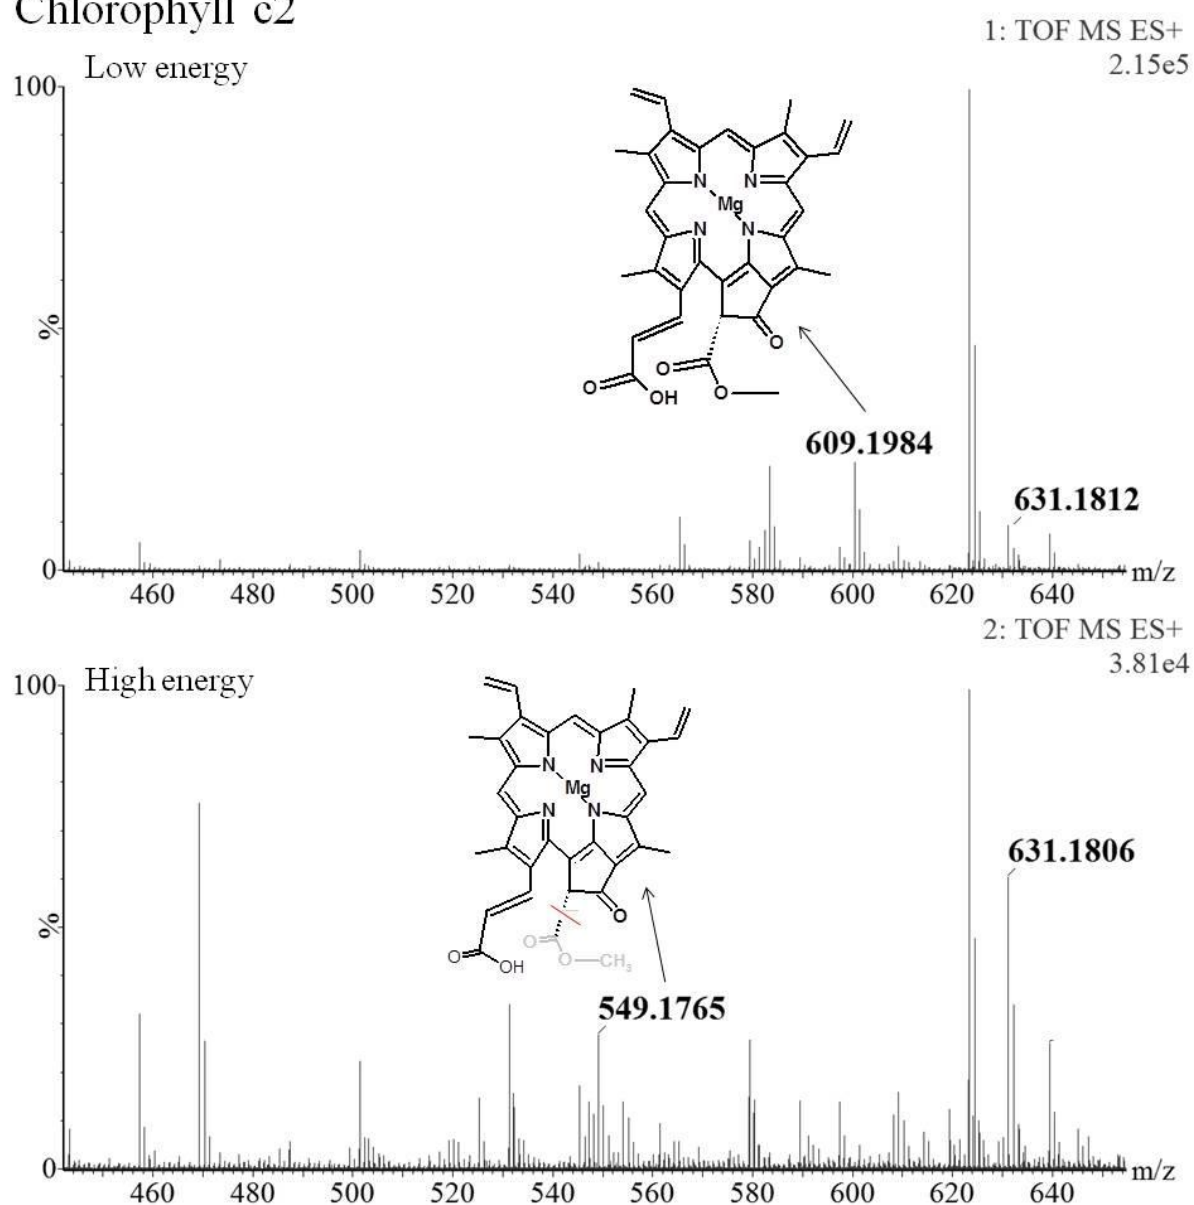

Figure S1. Cont.

## Chlorophyllide a

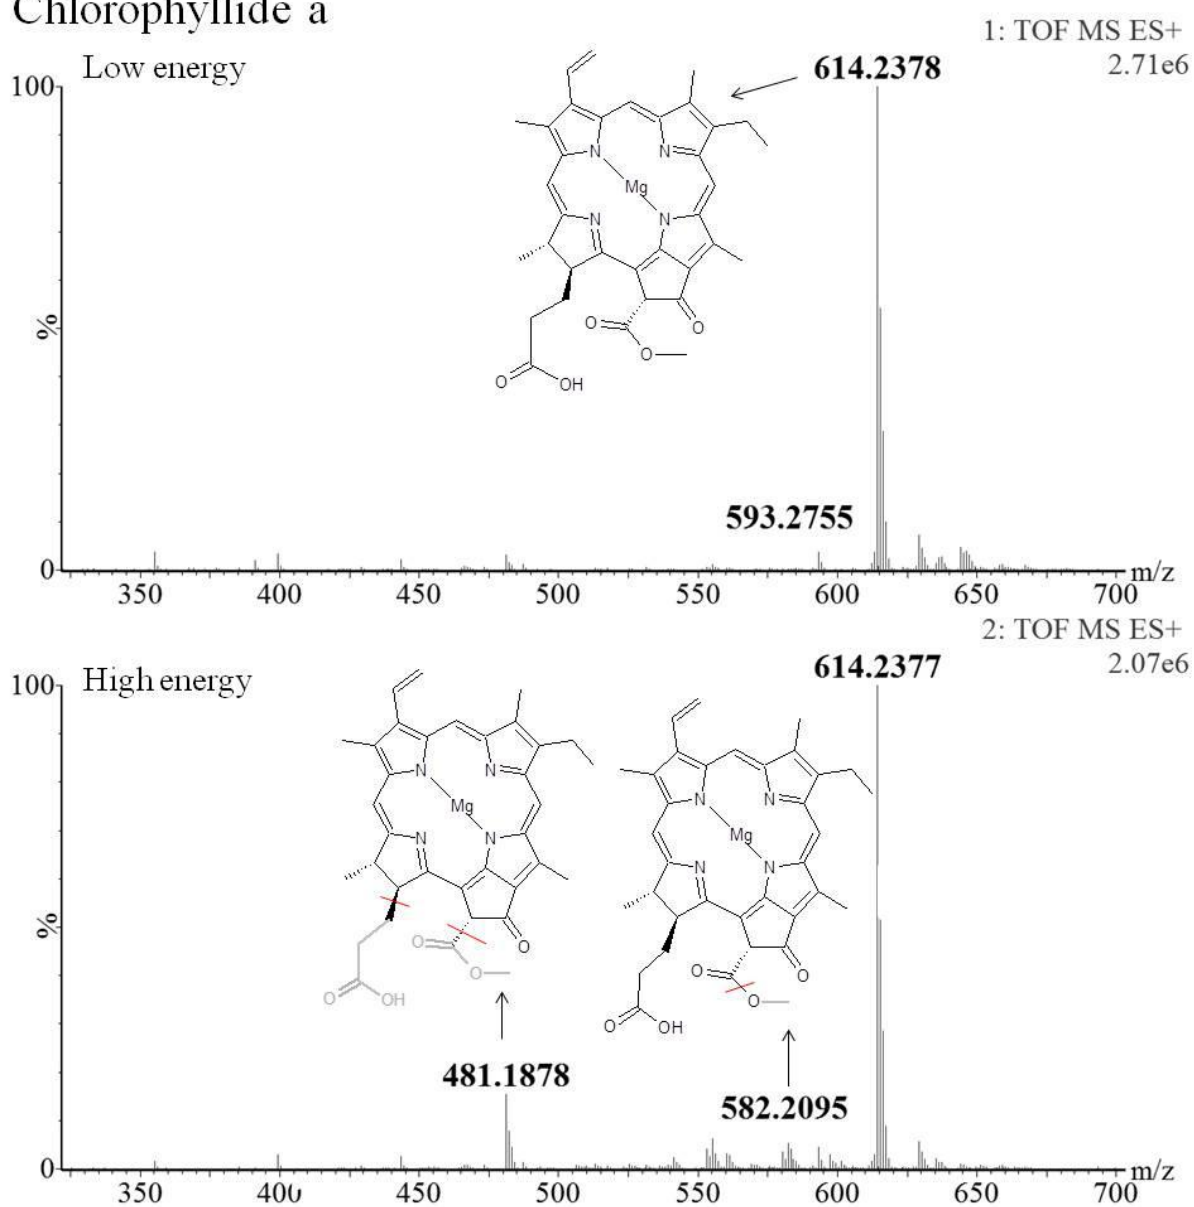

Figure S1. Cont.

## Diadinoxanthin

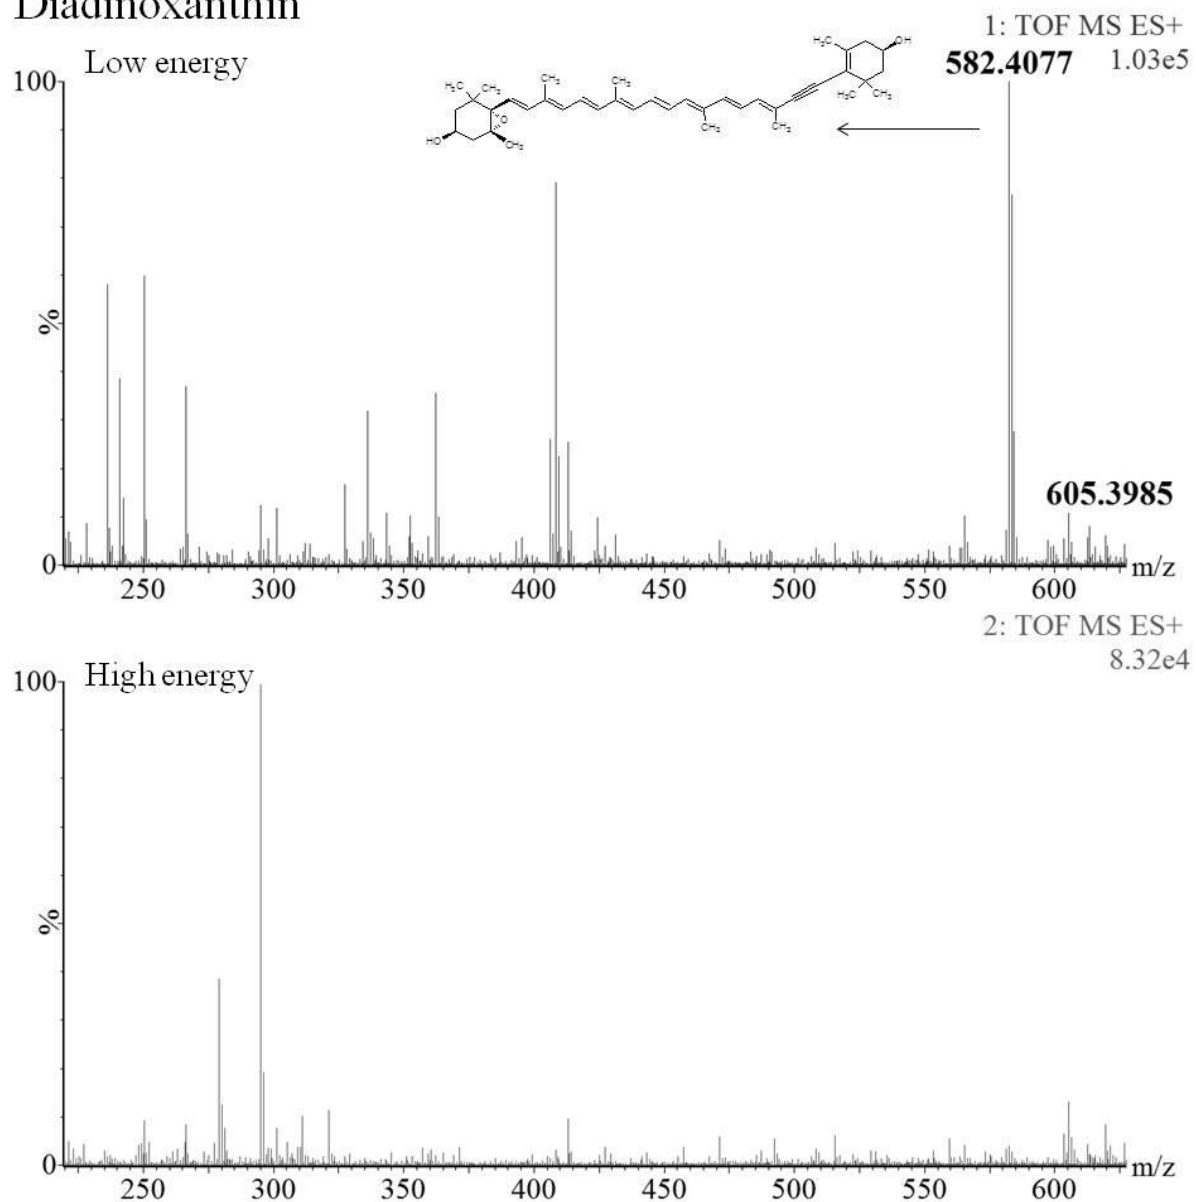

Figure S1. Cont.

## Diatoxanthin

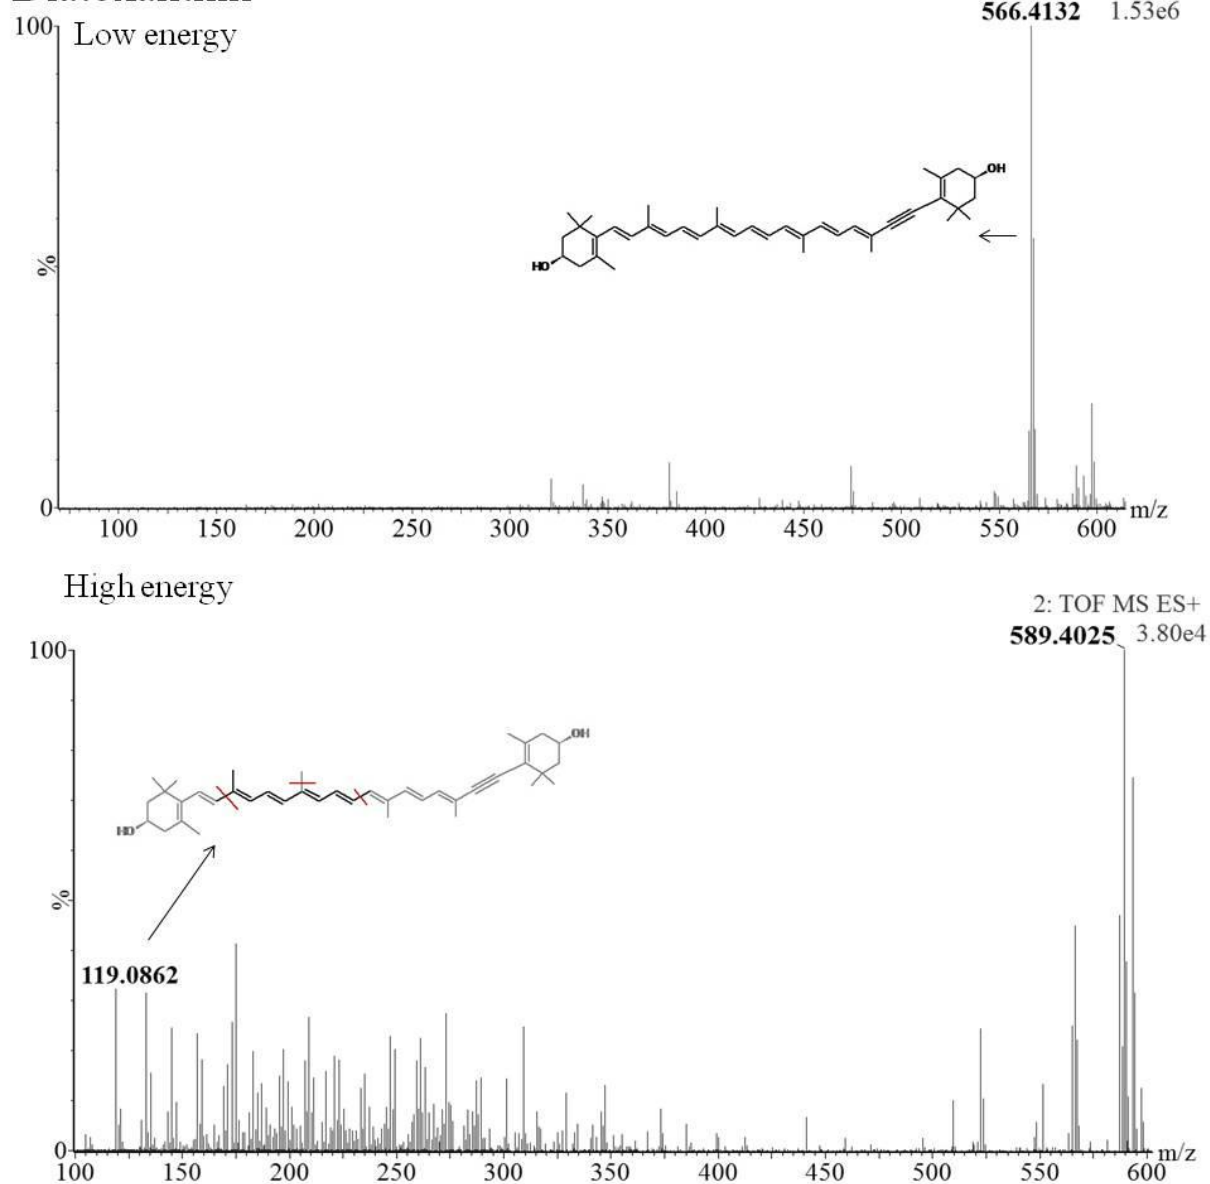

Figure S1. Cont.

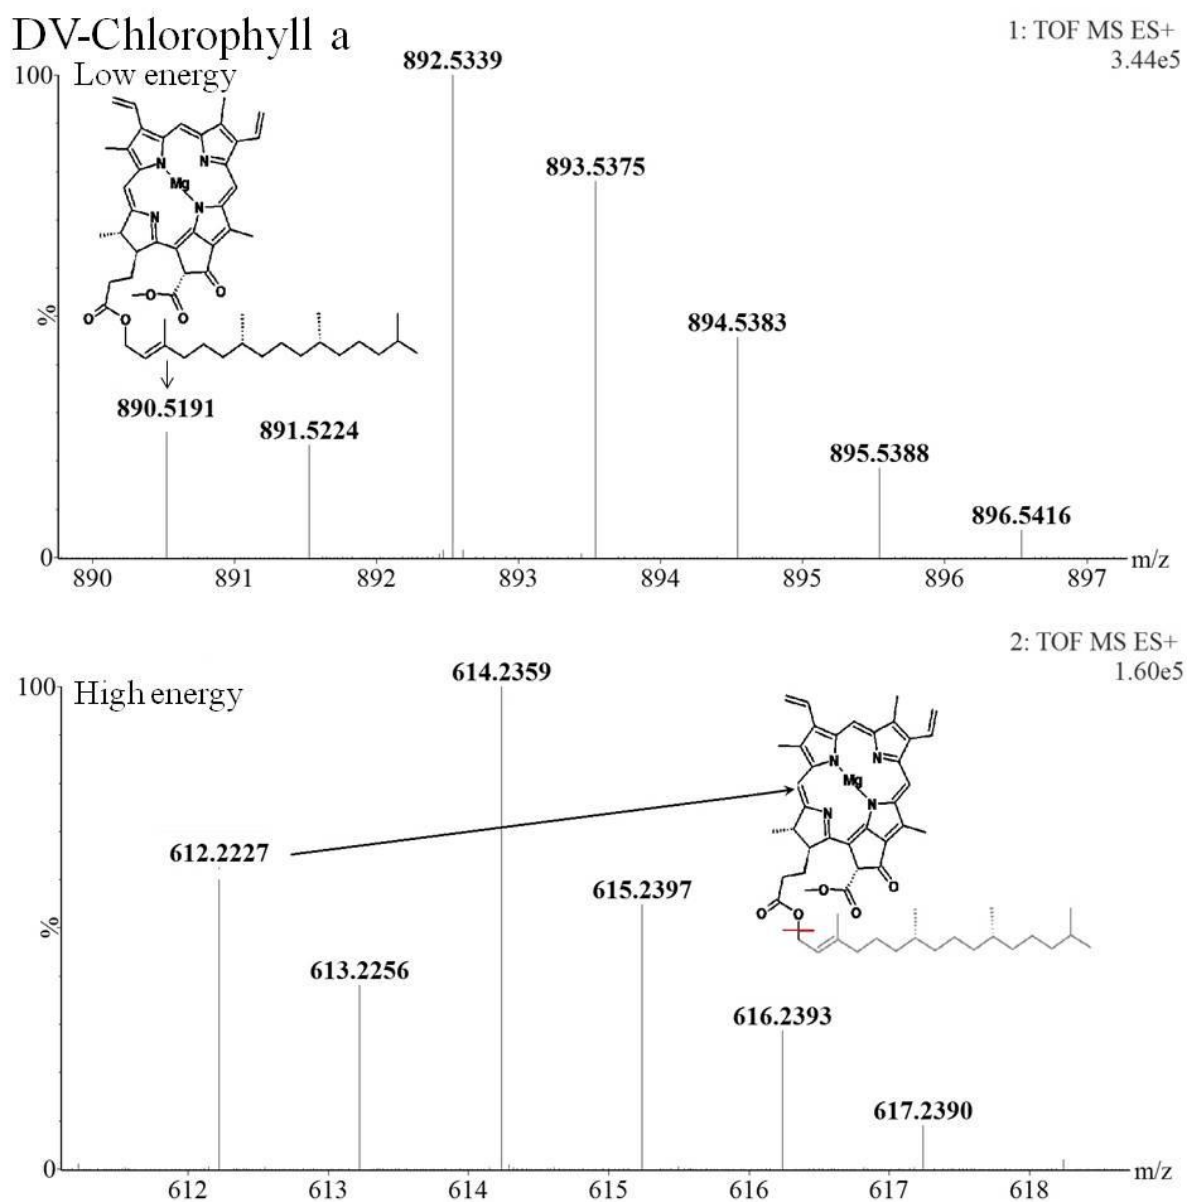

Figure S1. Cont.

## DV-Chlorophyll b

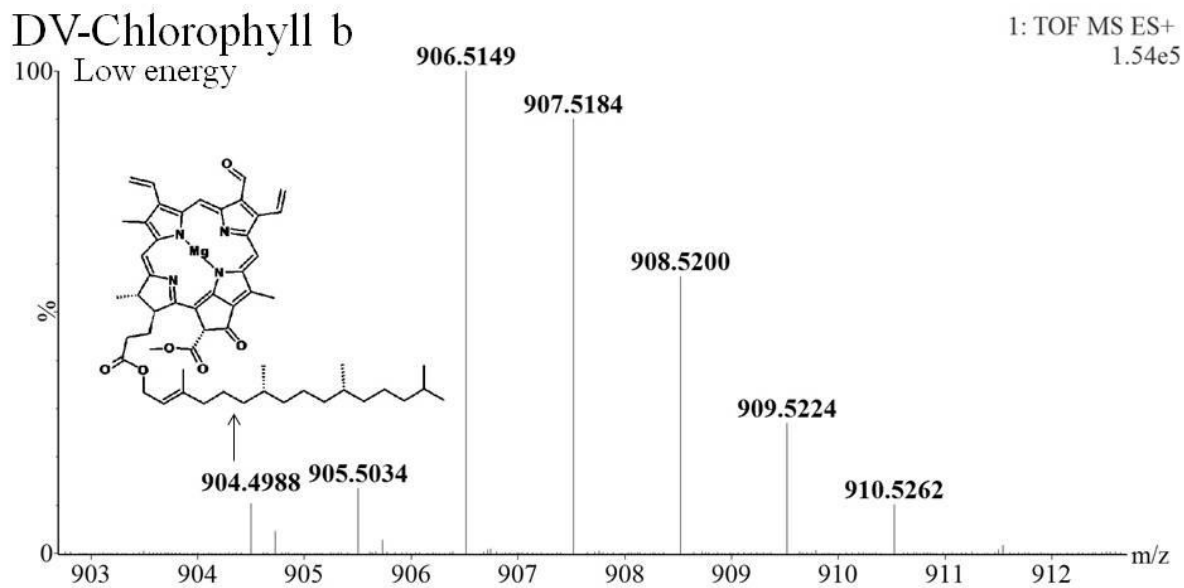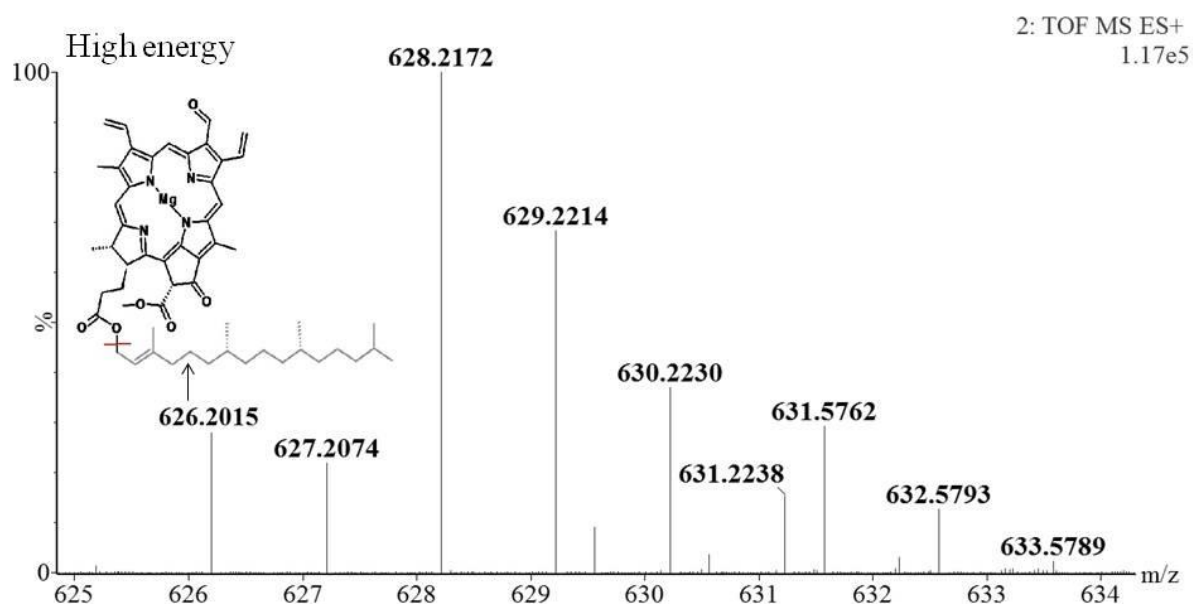

Figure S1. Cont.

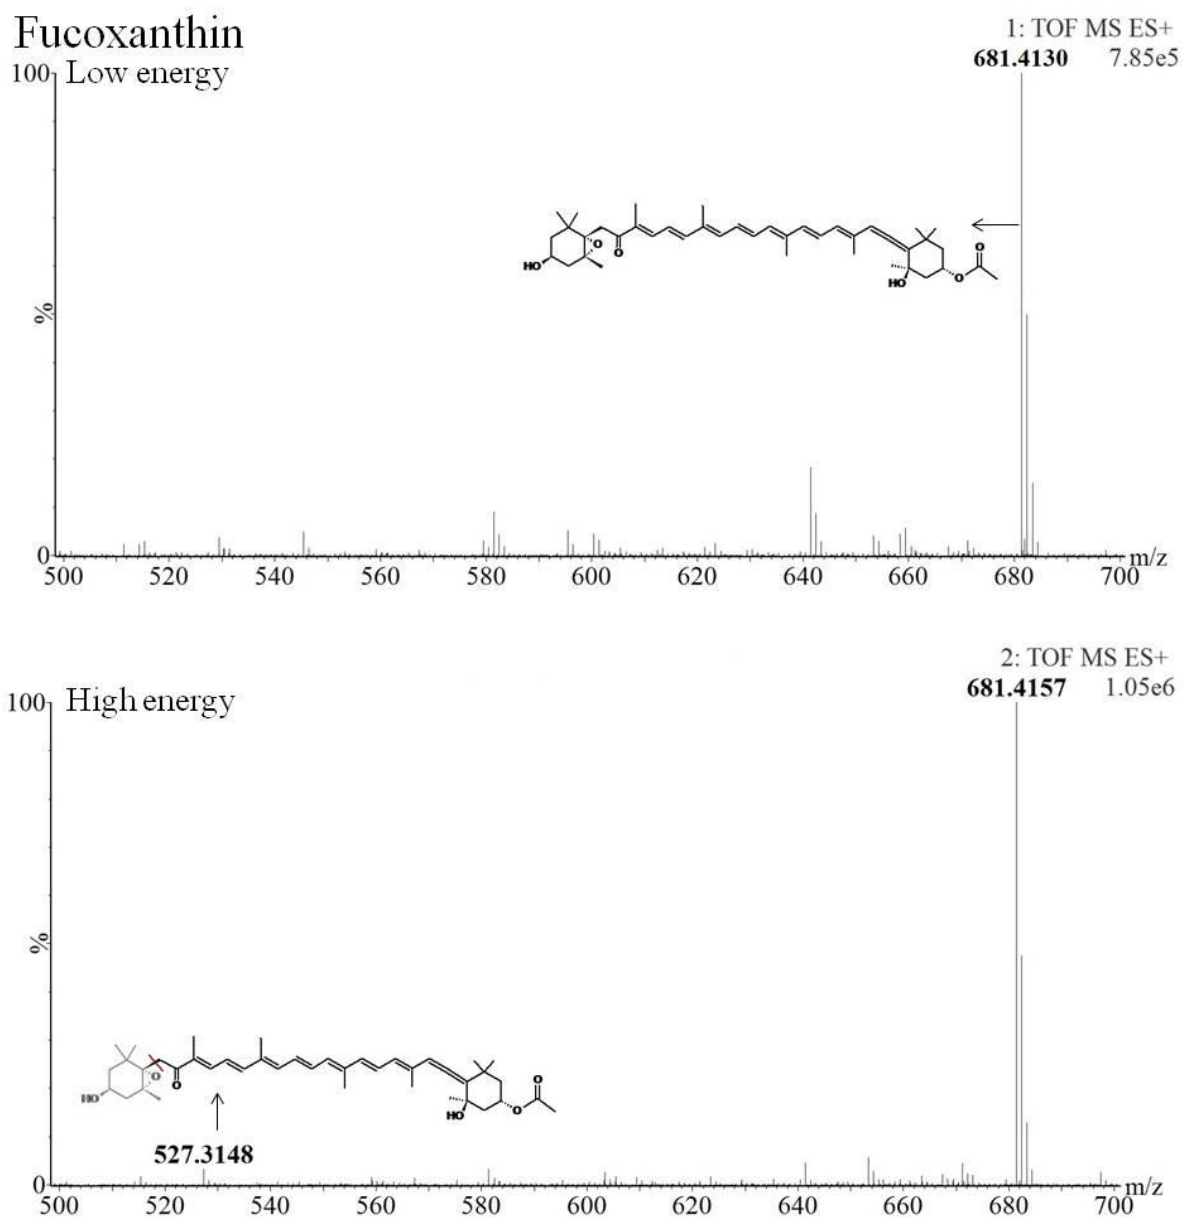

Figure S1. Cont.

## Peridinin

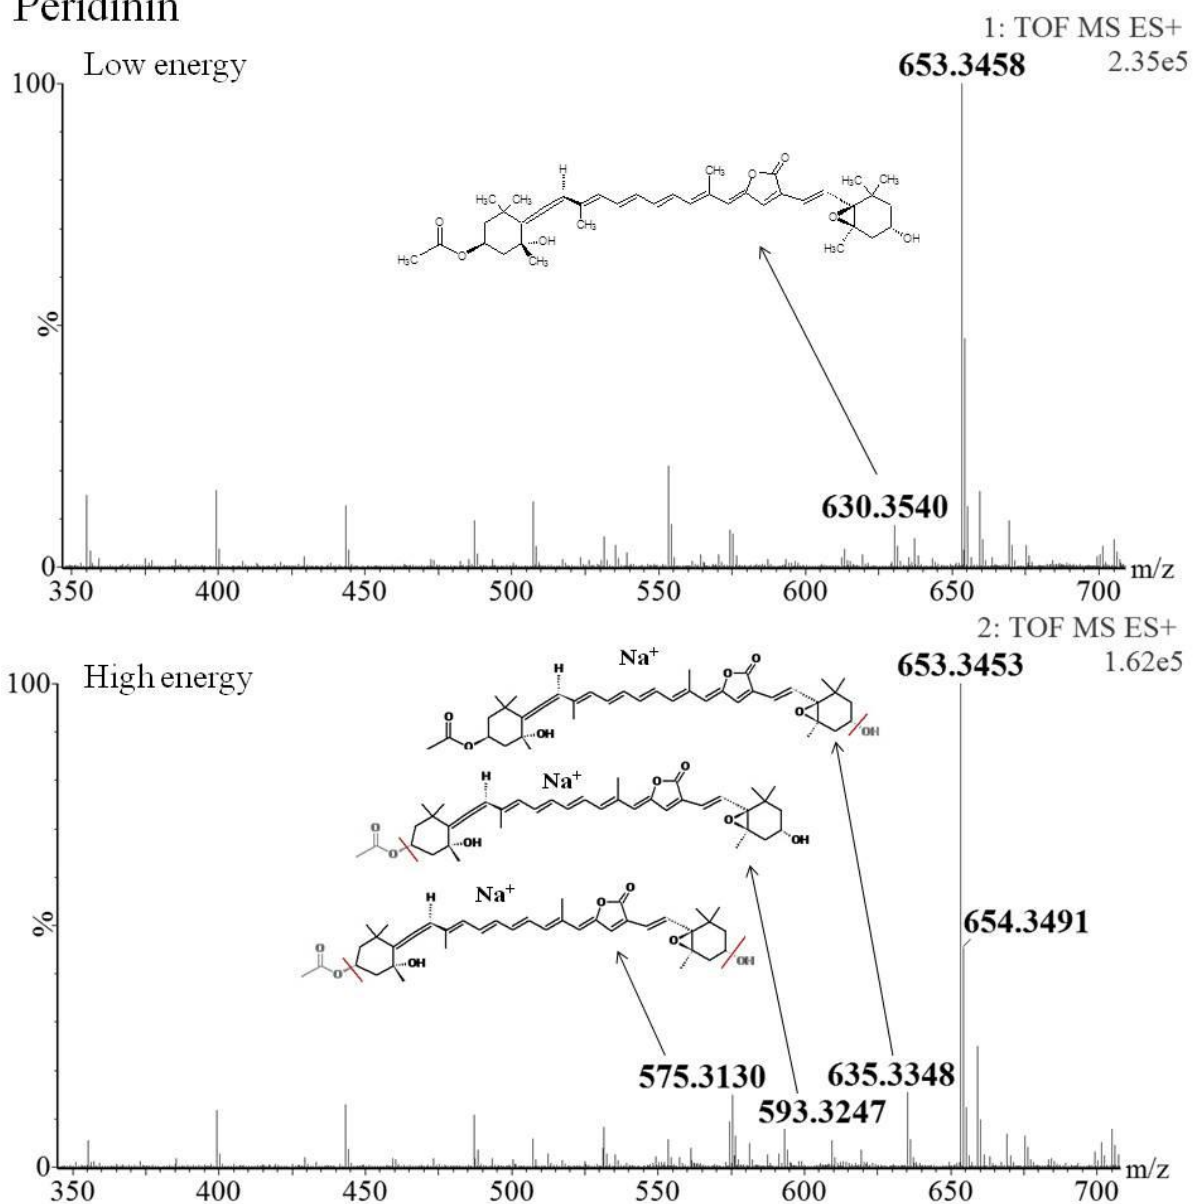

Figure S1. Cont.

## Pheophorbide a

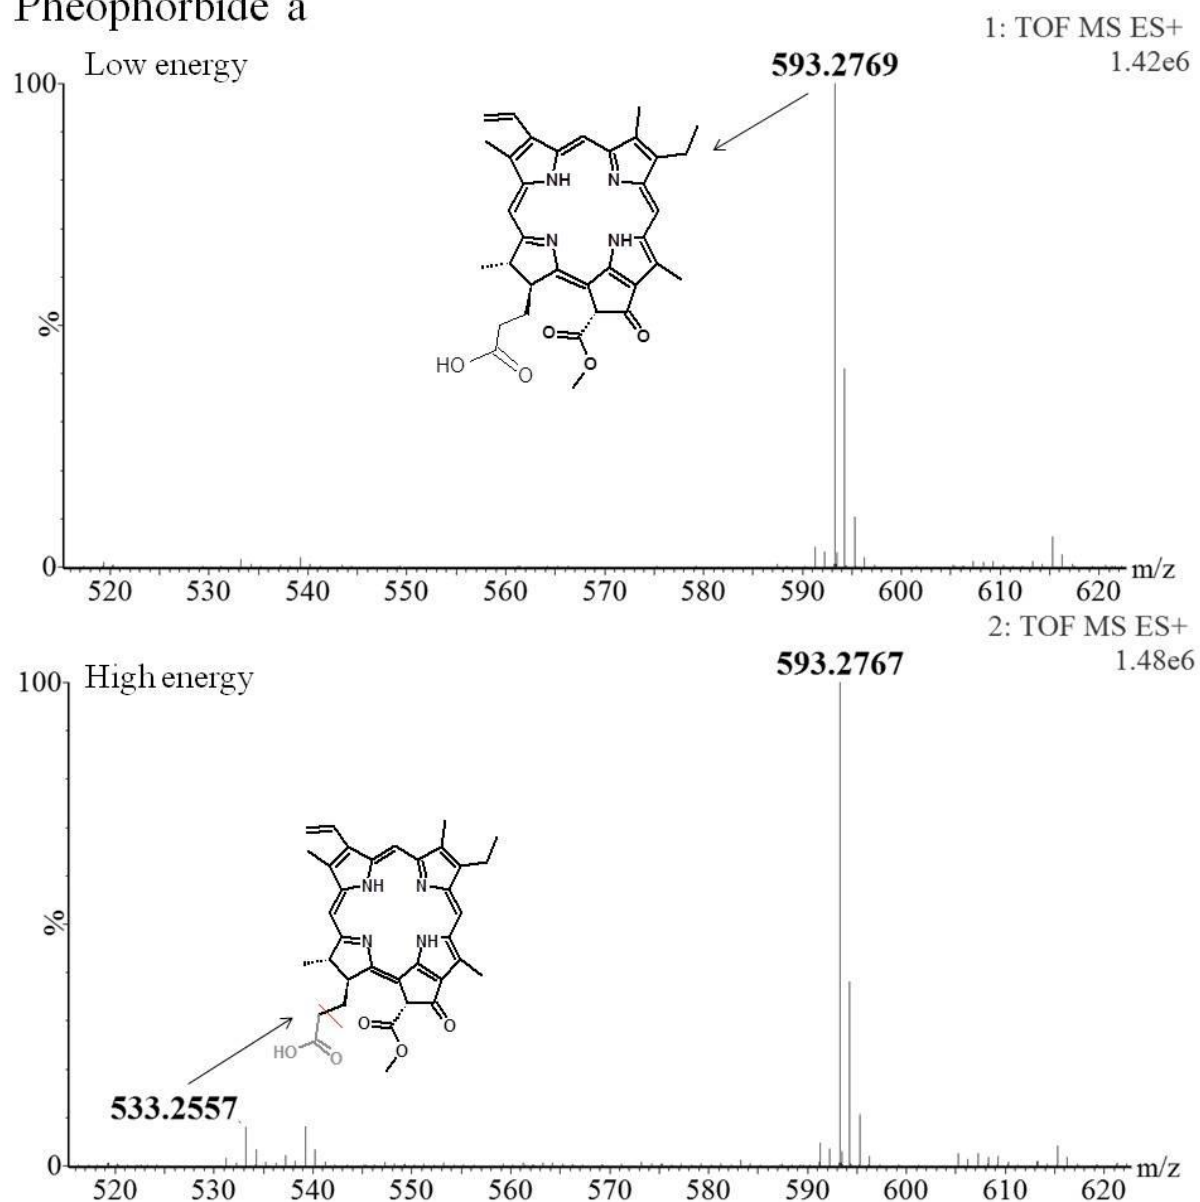

Figure S1. Cont.

## Pheophytin a Rt 7.43

100 Low energy

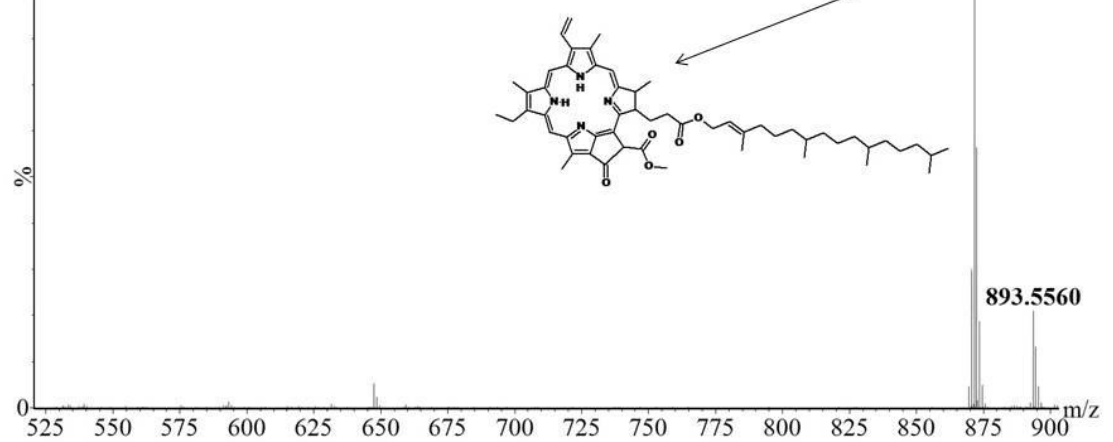1: TOF MS ES+  
871.5734 1.75e6

100 High energy

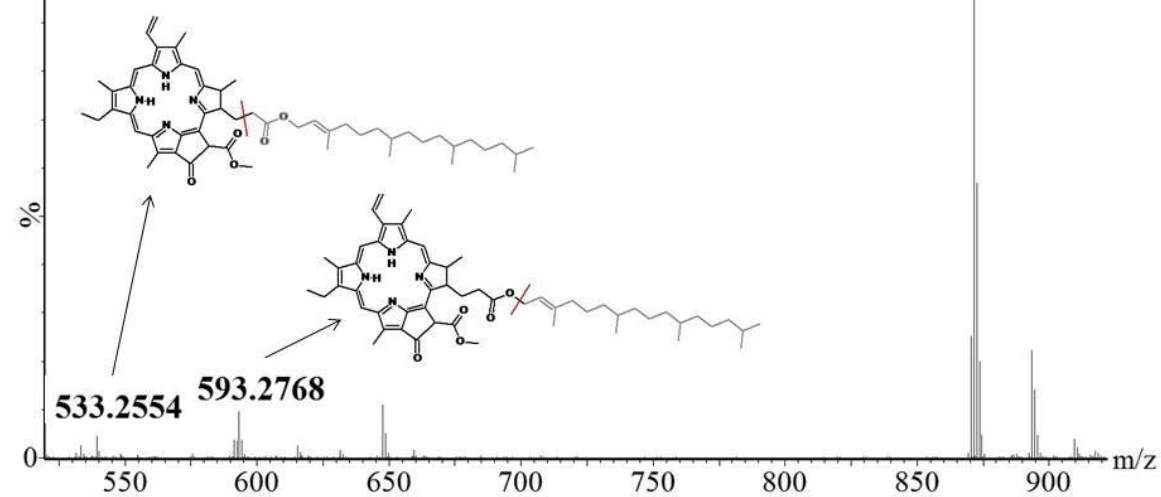2: TOF MS ES+  
871.5763 1.03e6

Figure S1. Cont.

## Pheophytin a Rt 7.88

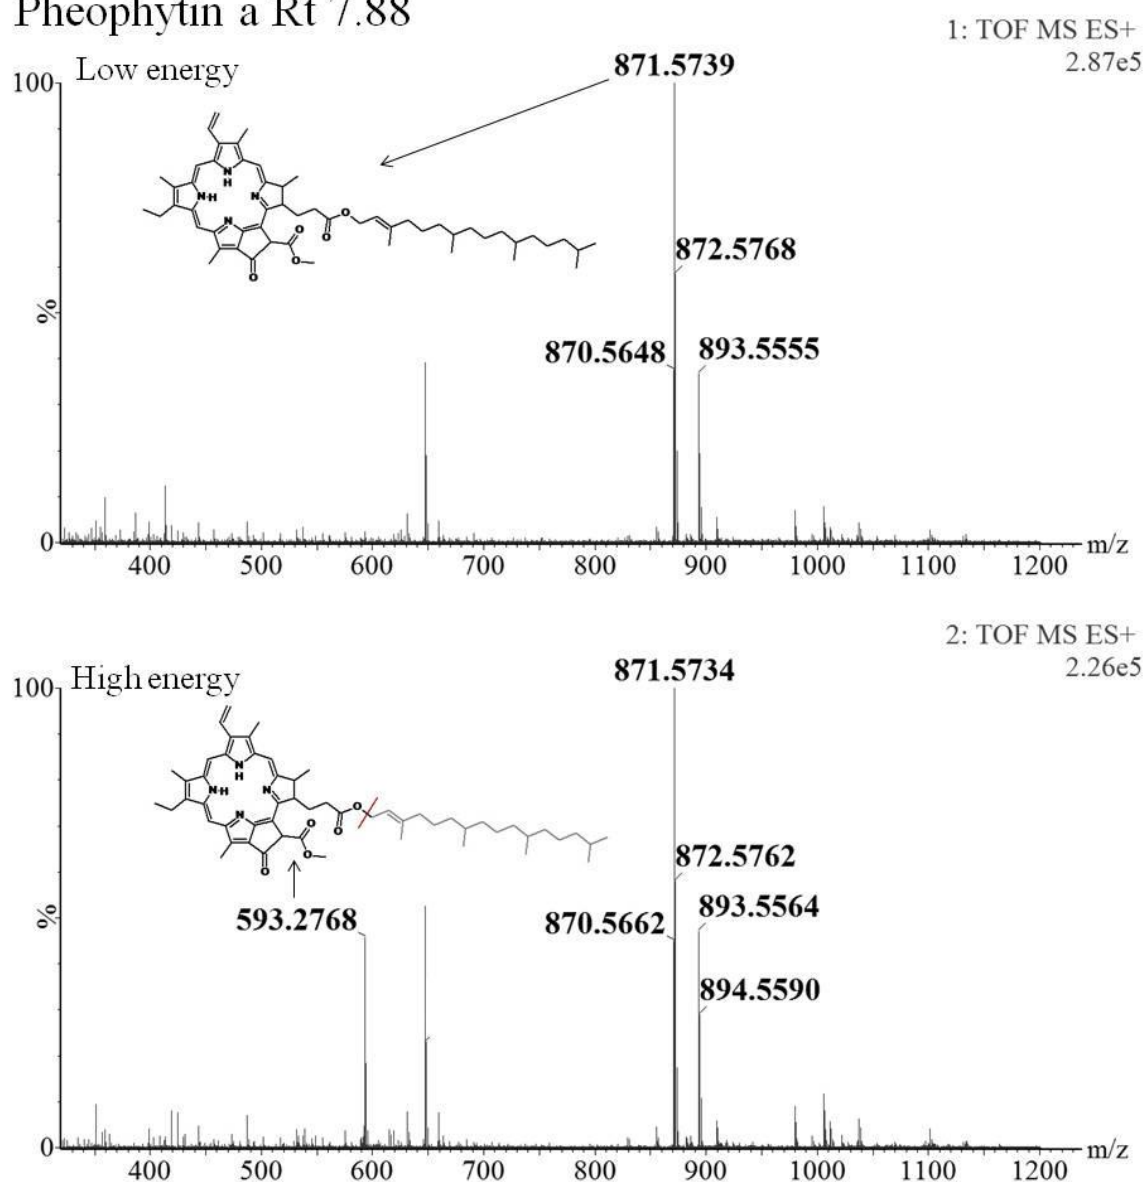

Figure S1. Cont.

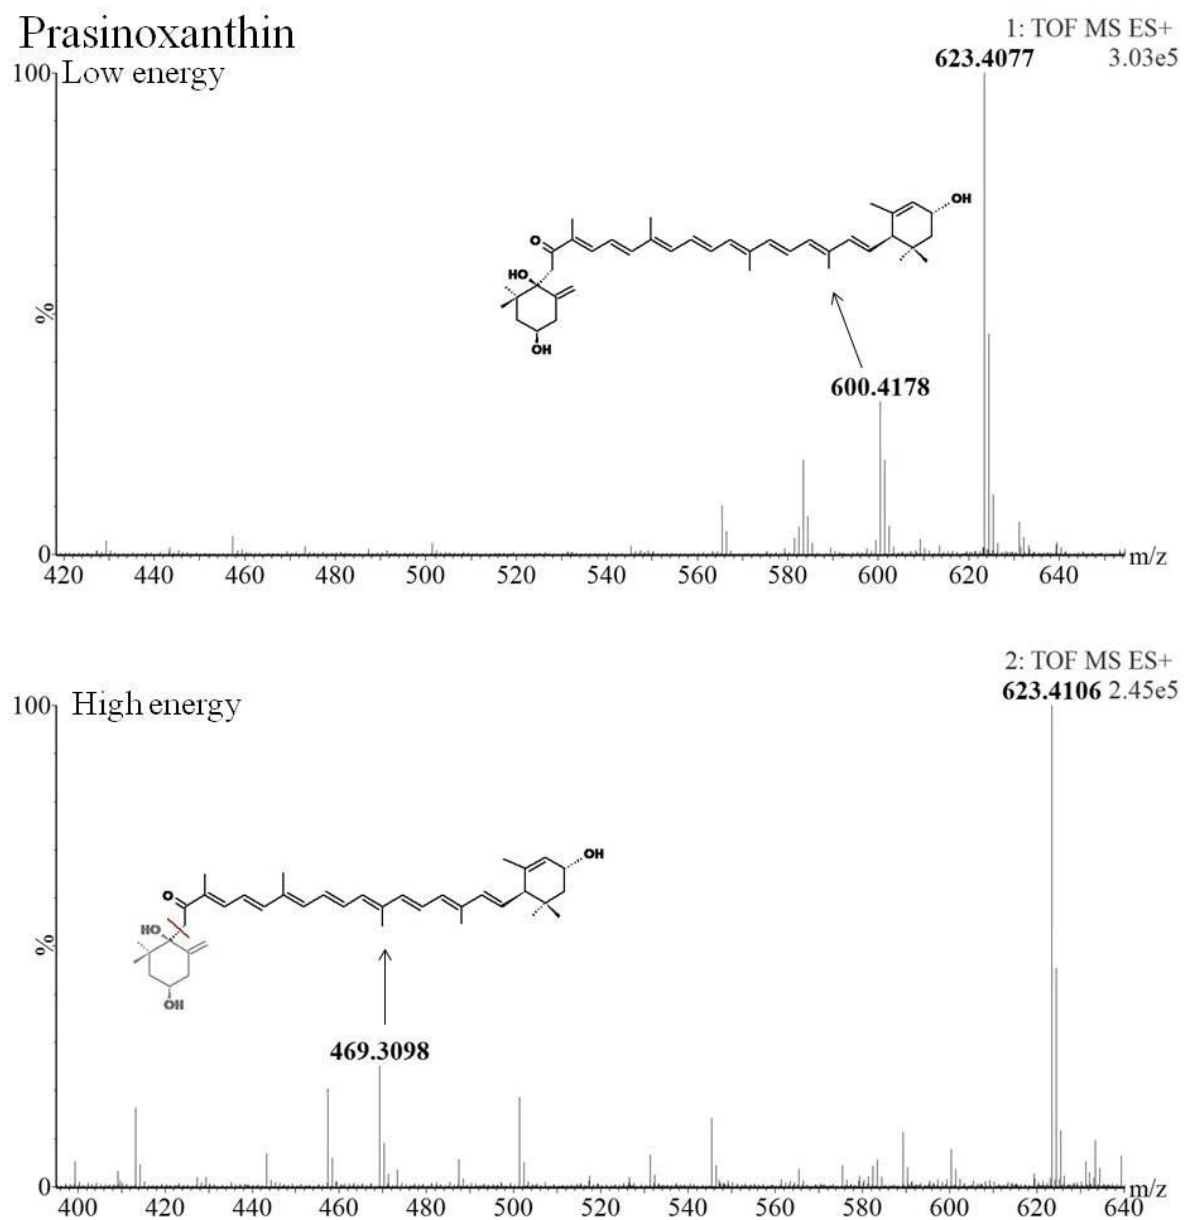

Figure S1. Cont.

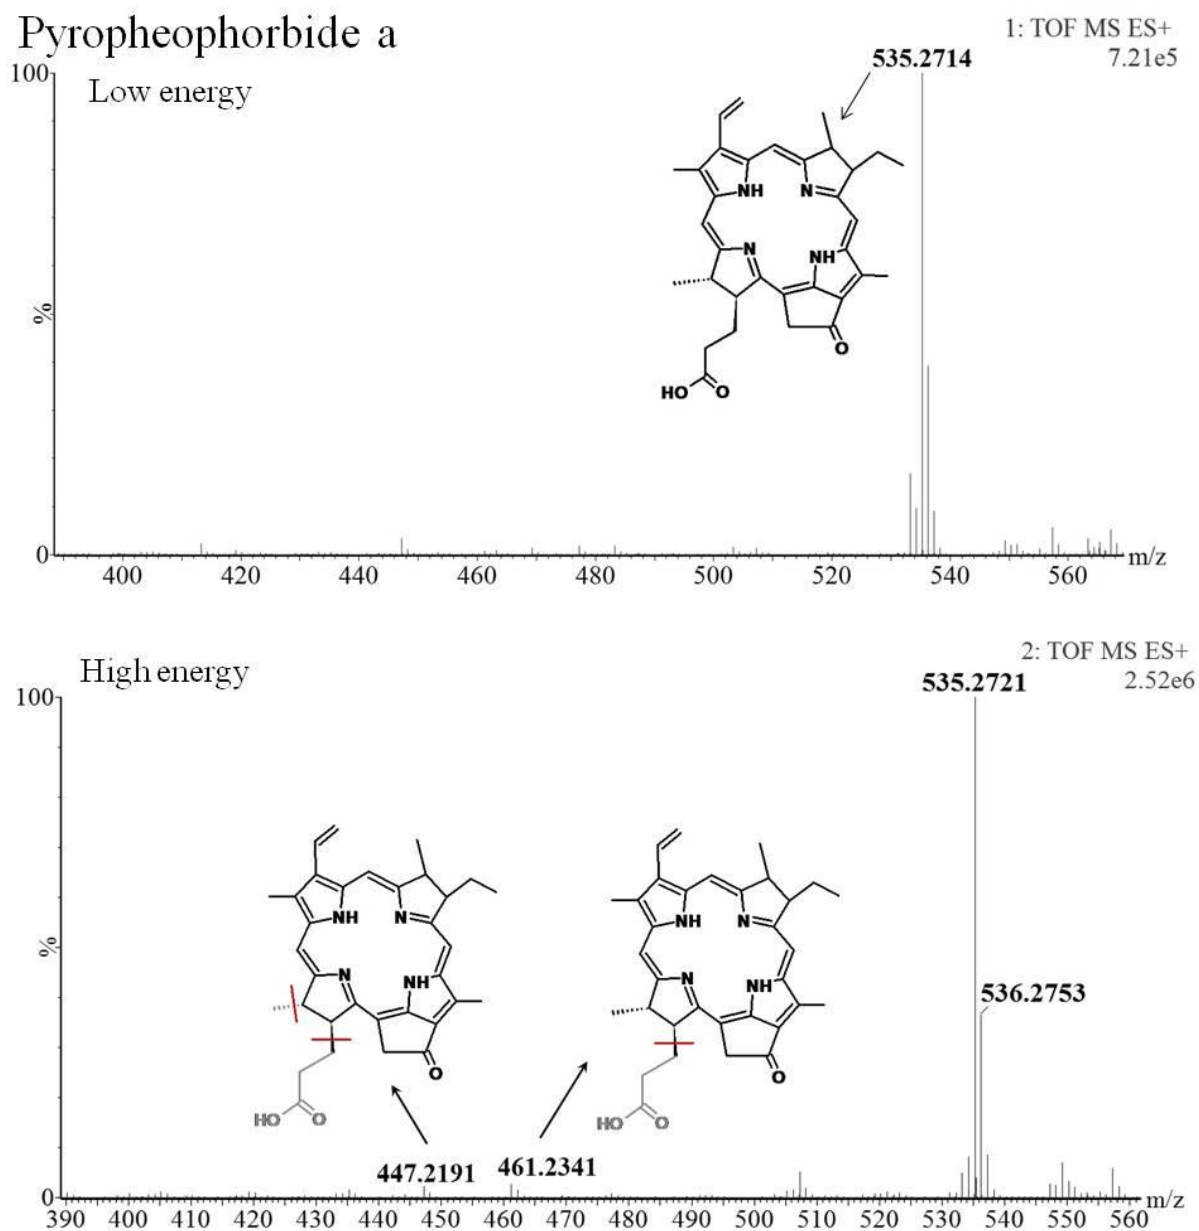

Figure S1. Cont.

Violaxanthin Rt 3.64

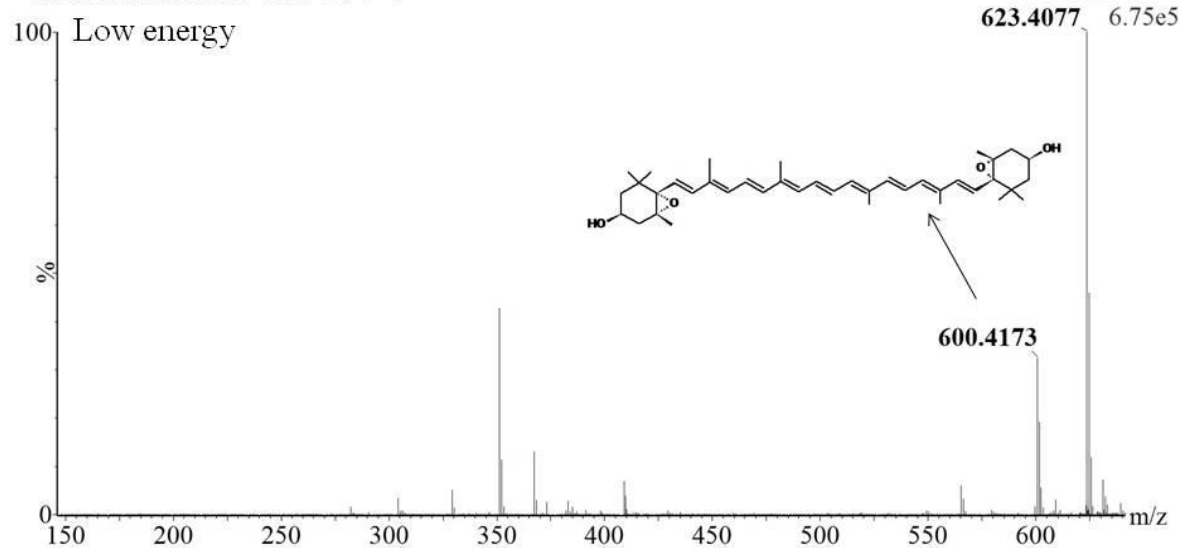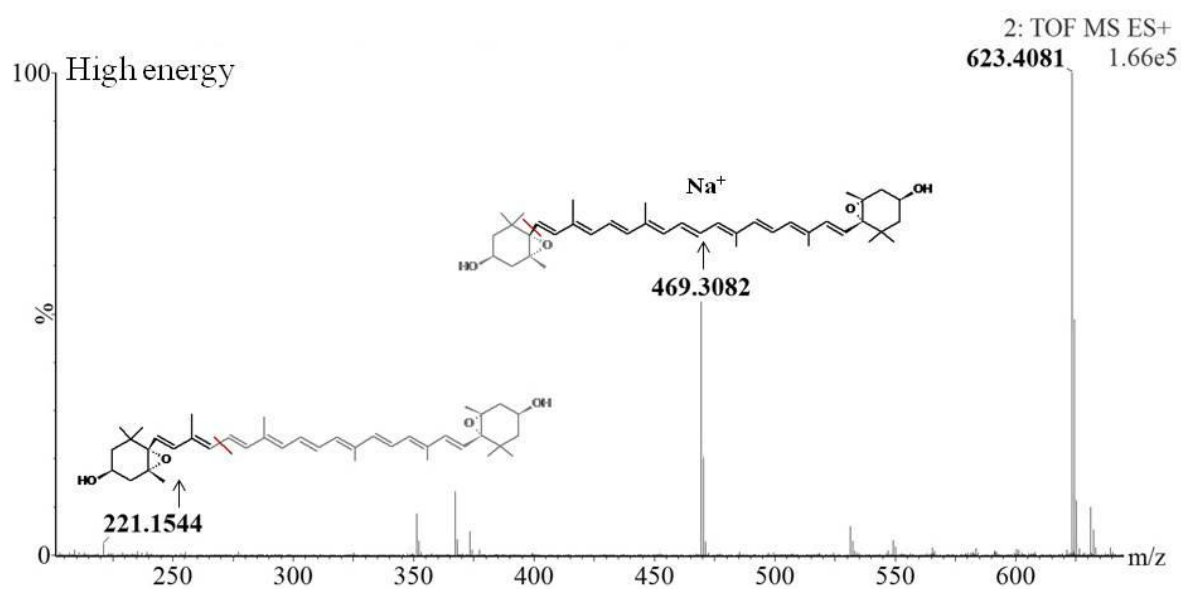

**Figure S1. Cont.**

## Zeaxanthin Rt 4.04

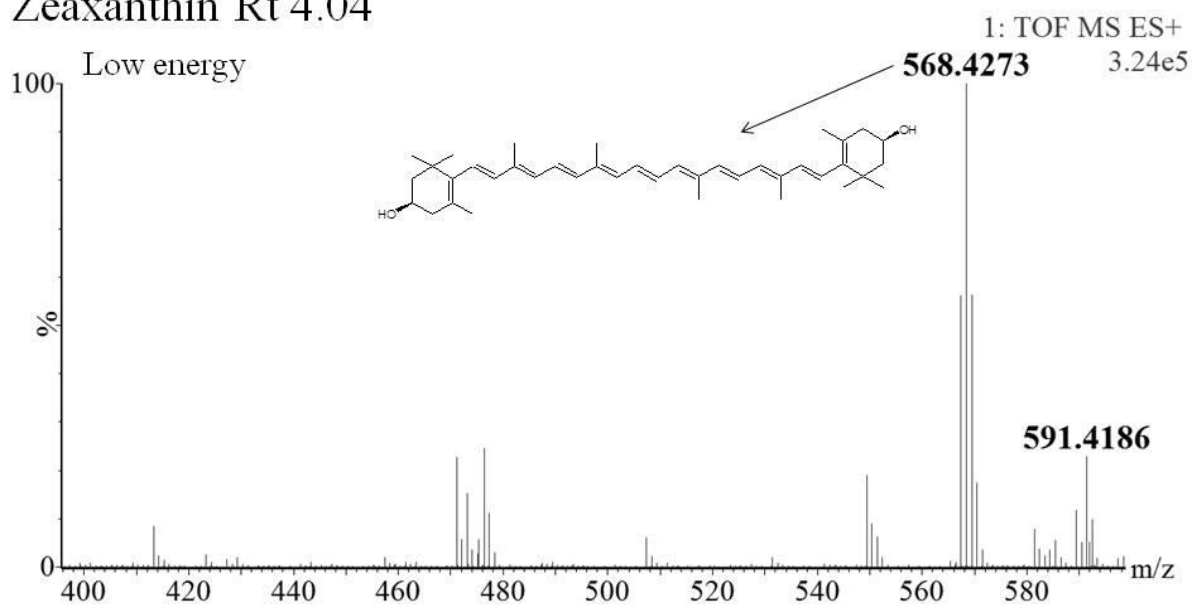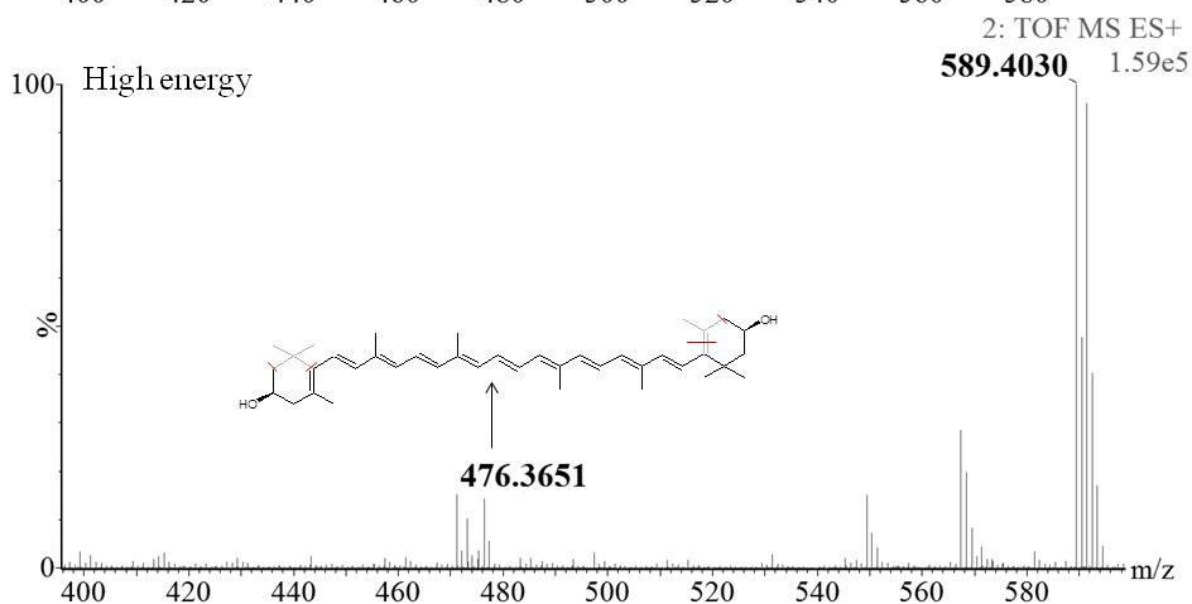

Figure S1. Cont.

## Zeaxanthin Rt 4.47

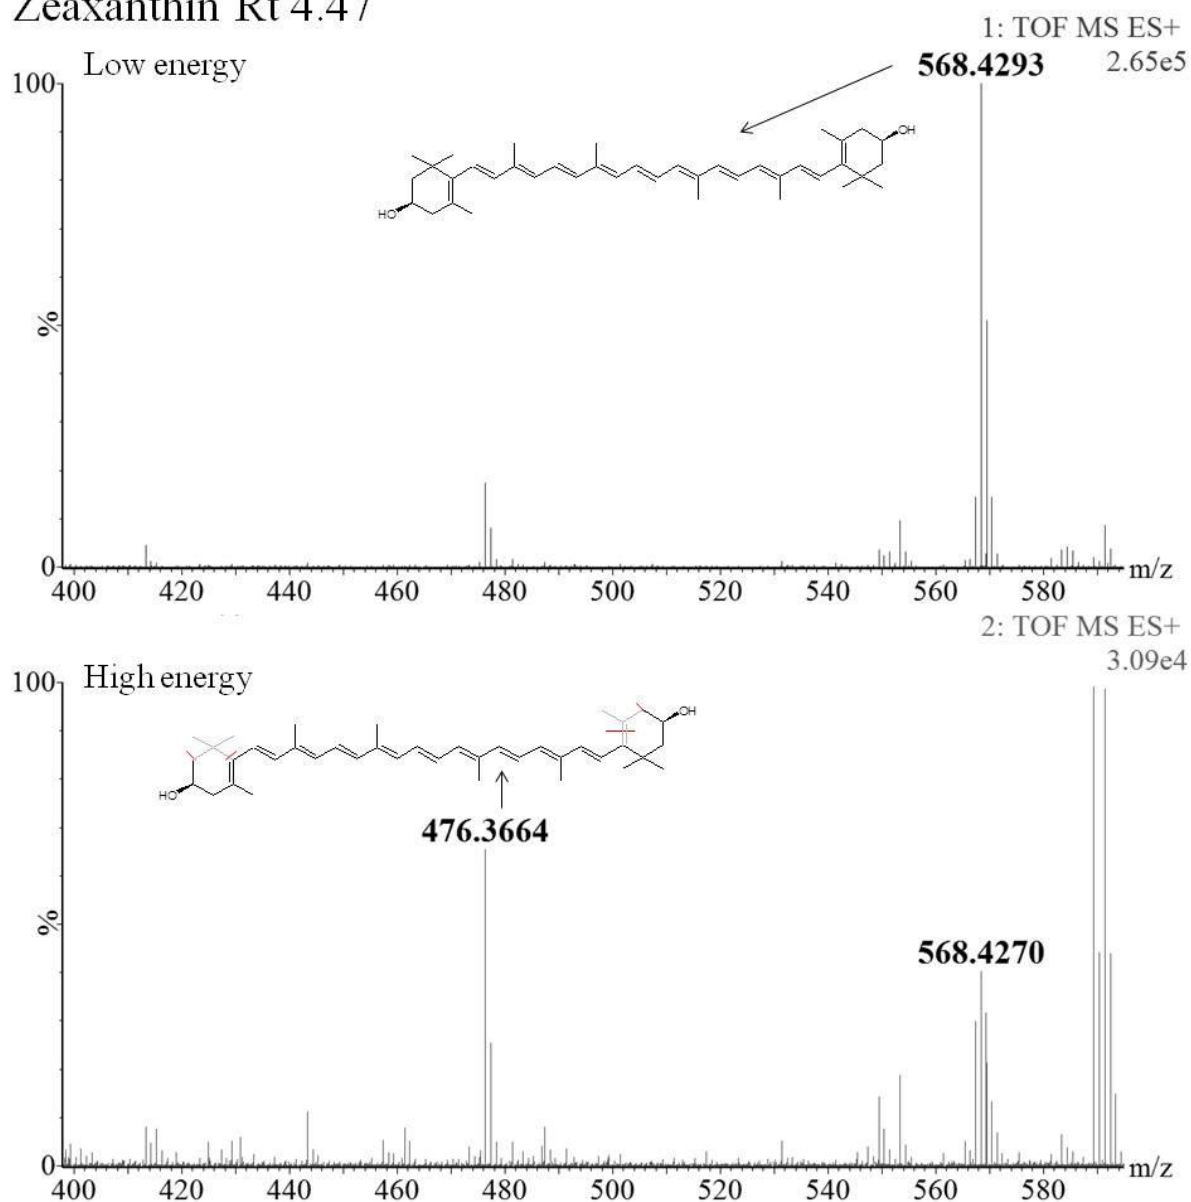**Figure S1.** High resolution MS<sup>E</sup> spectra of standard pigments.

## Peak 1

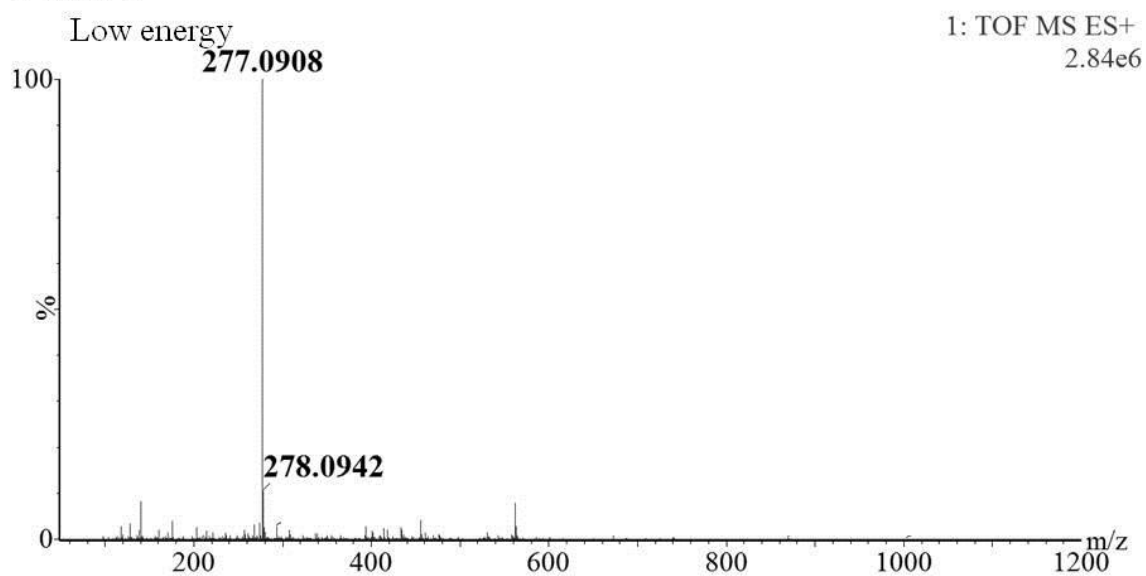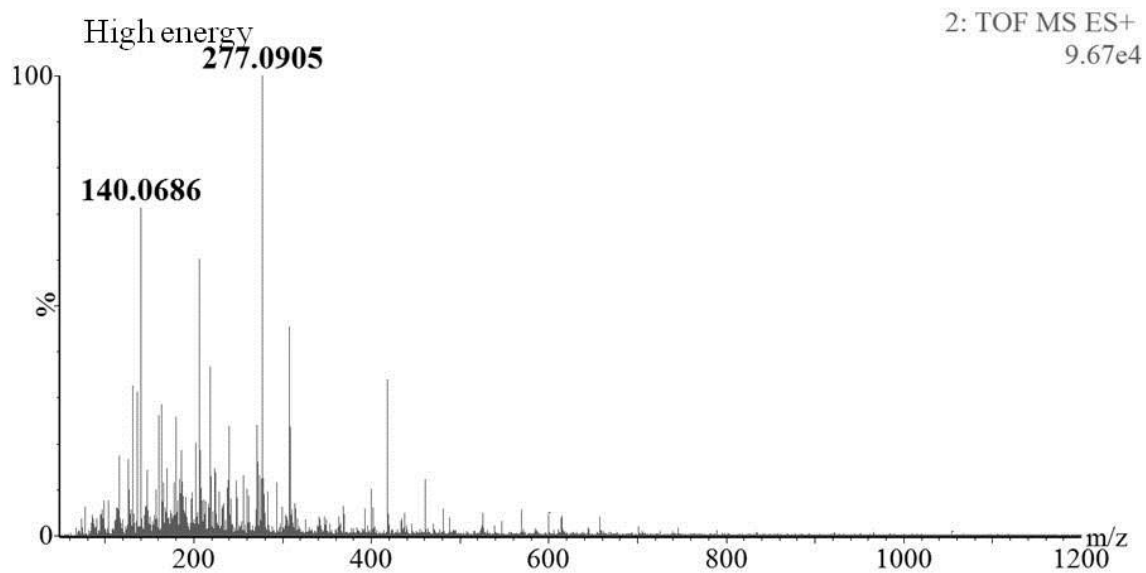

Figure S2. Cont.

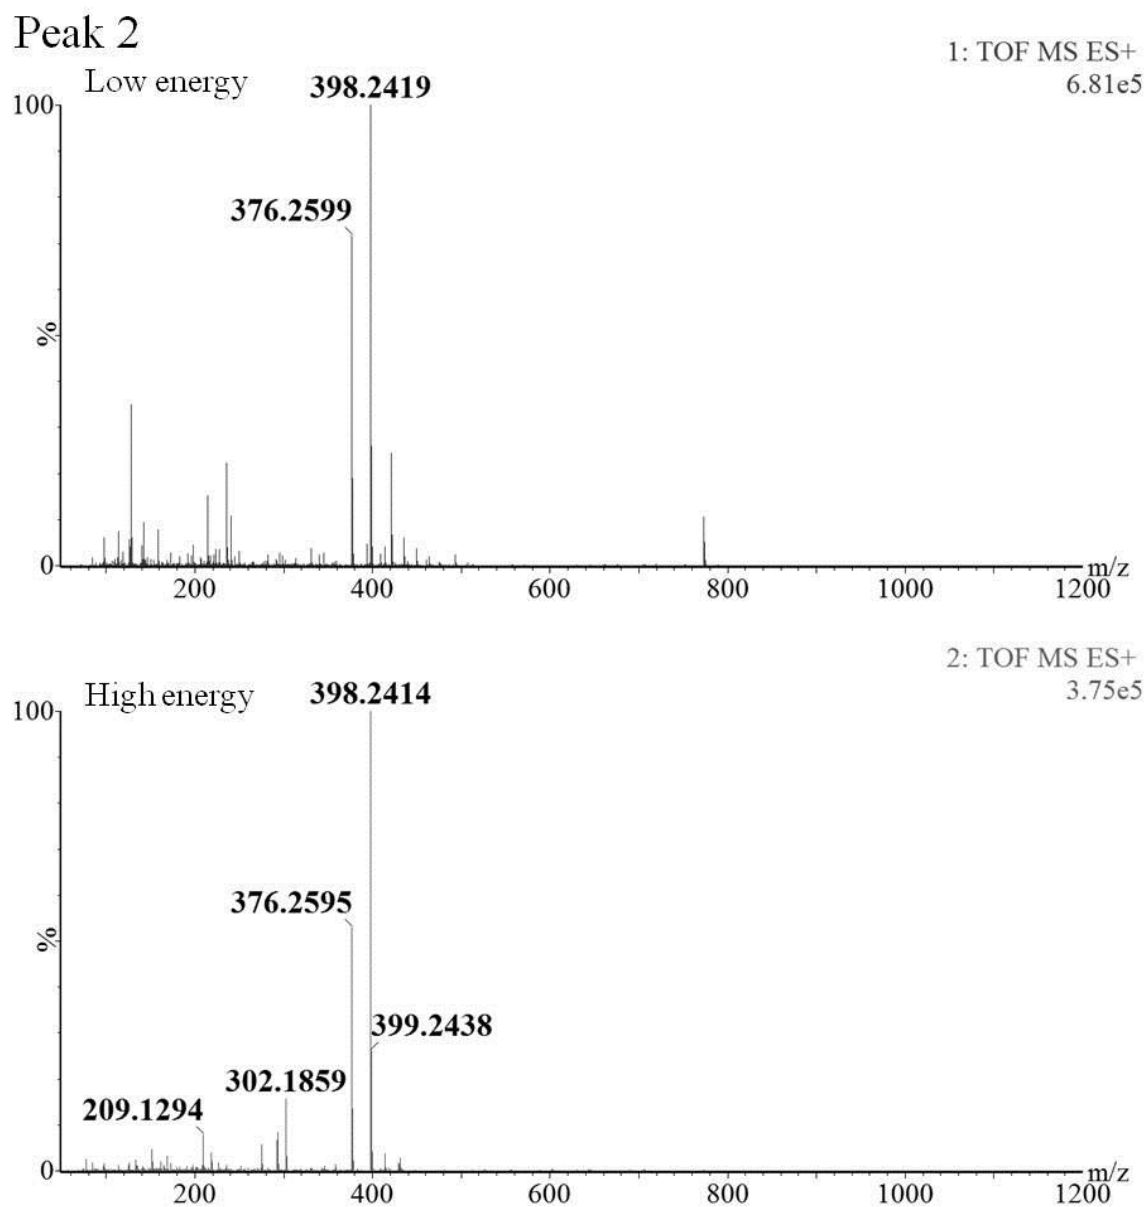

Figure S2. Cont.

## Peak 3

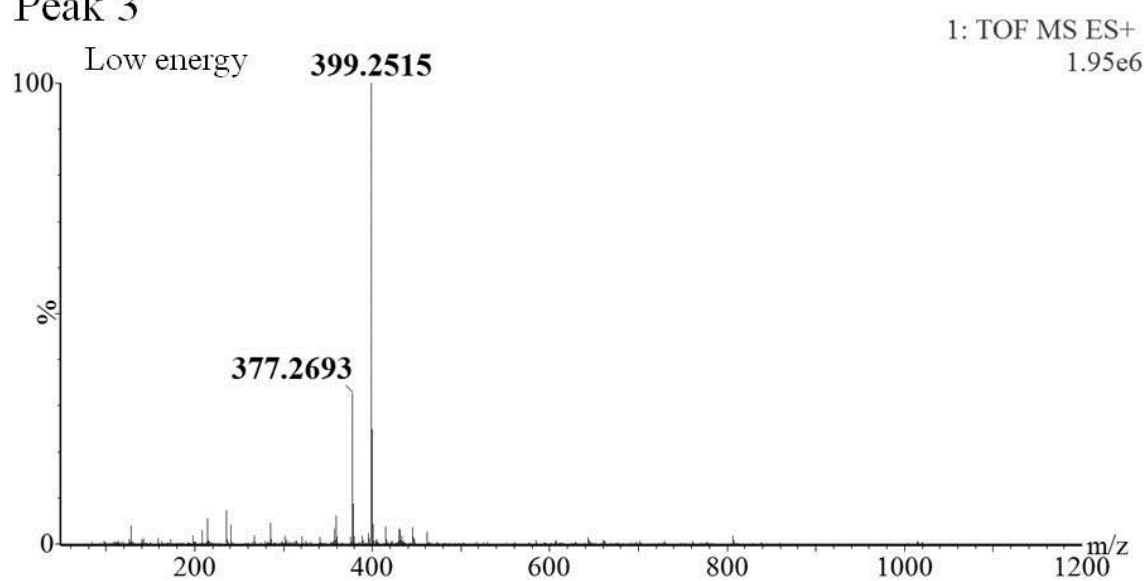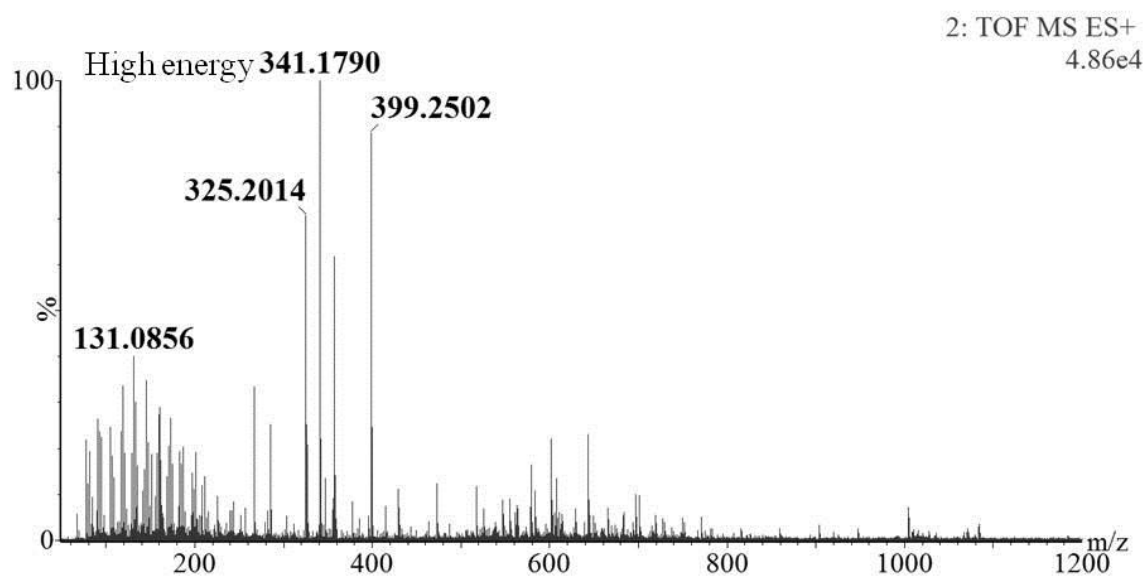

Figure S2. Cont.

## Peak 4

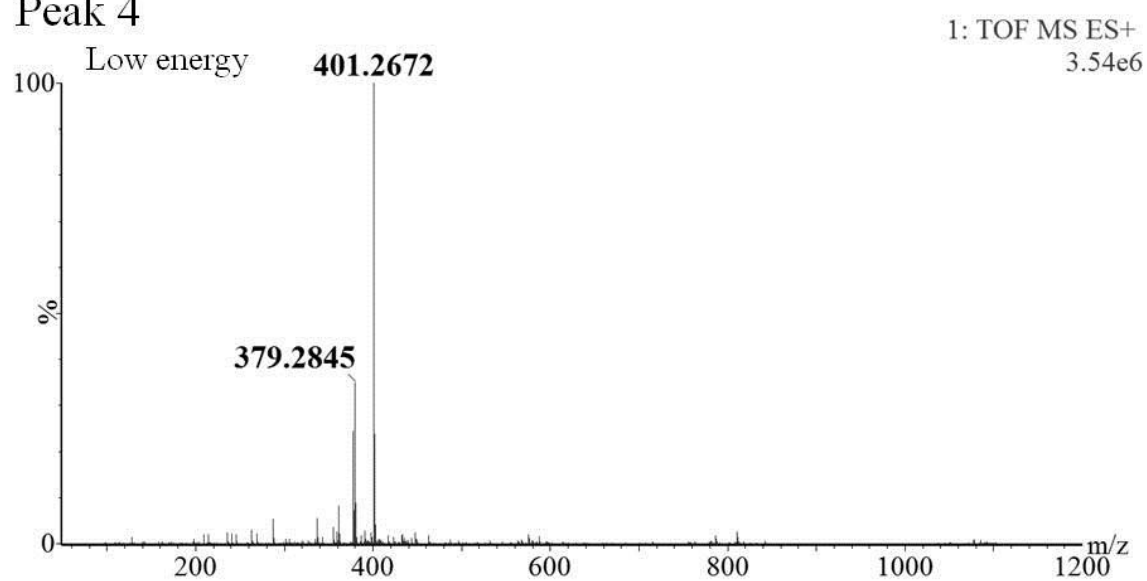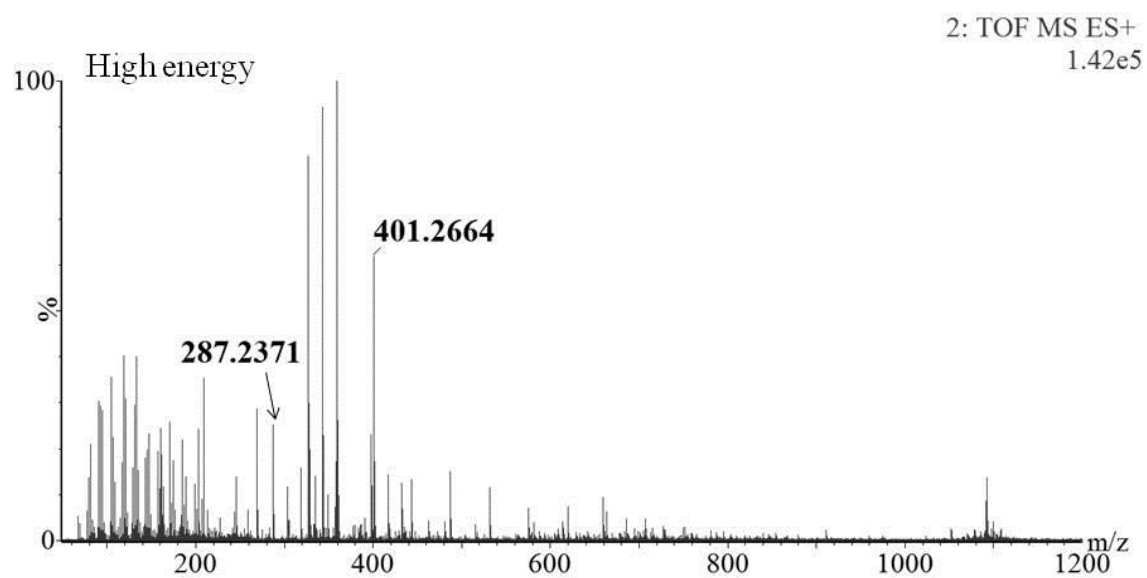

Figure S2. Cont.

## Peak 5

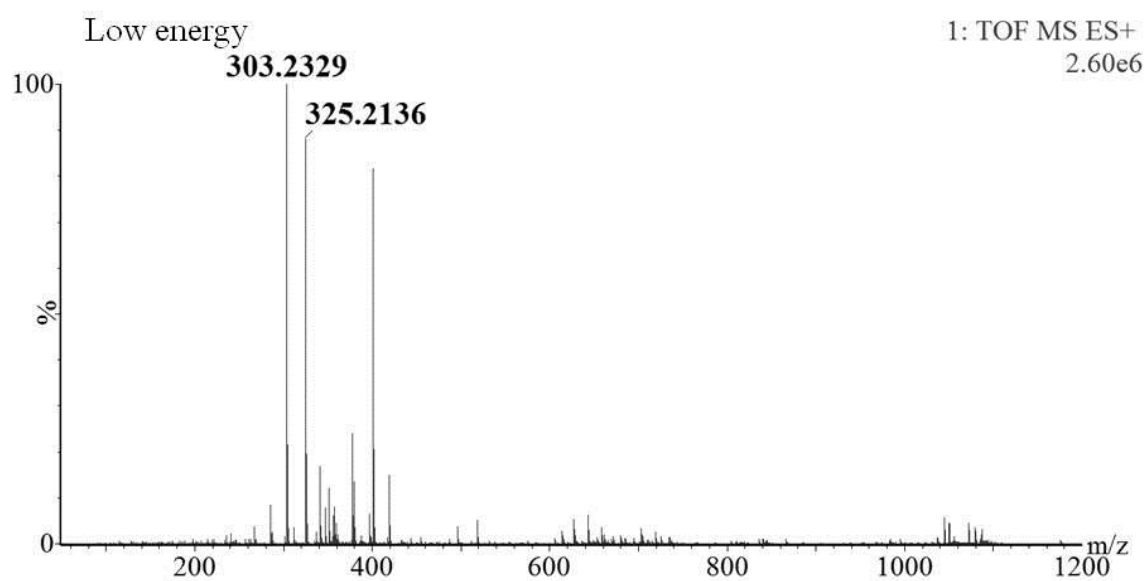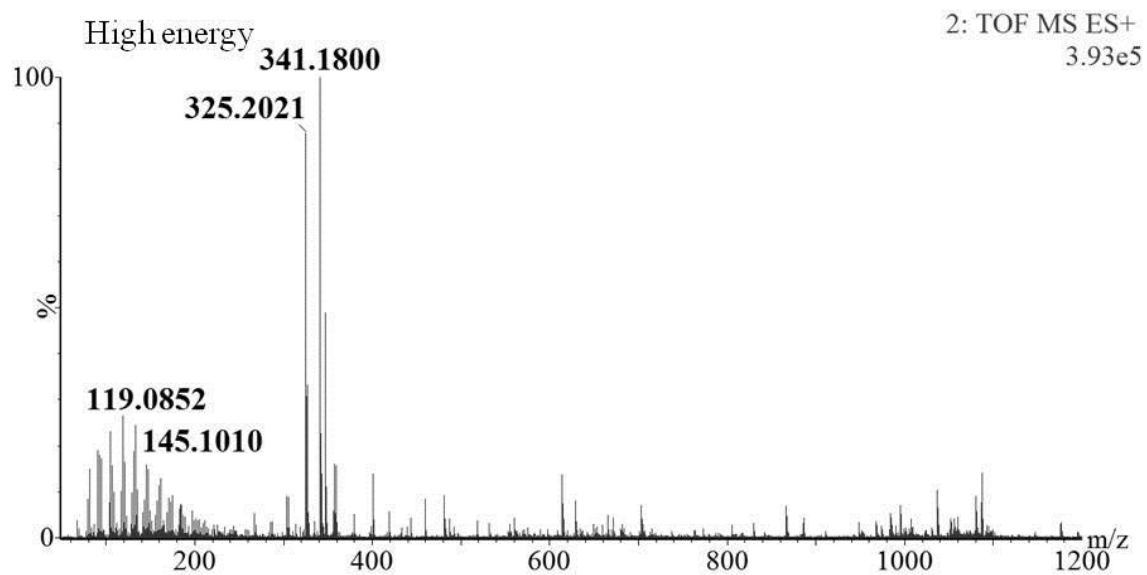

Figure S2. Cont.

## Peak 6

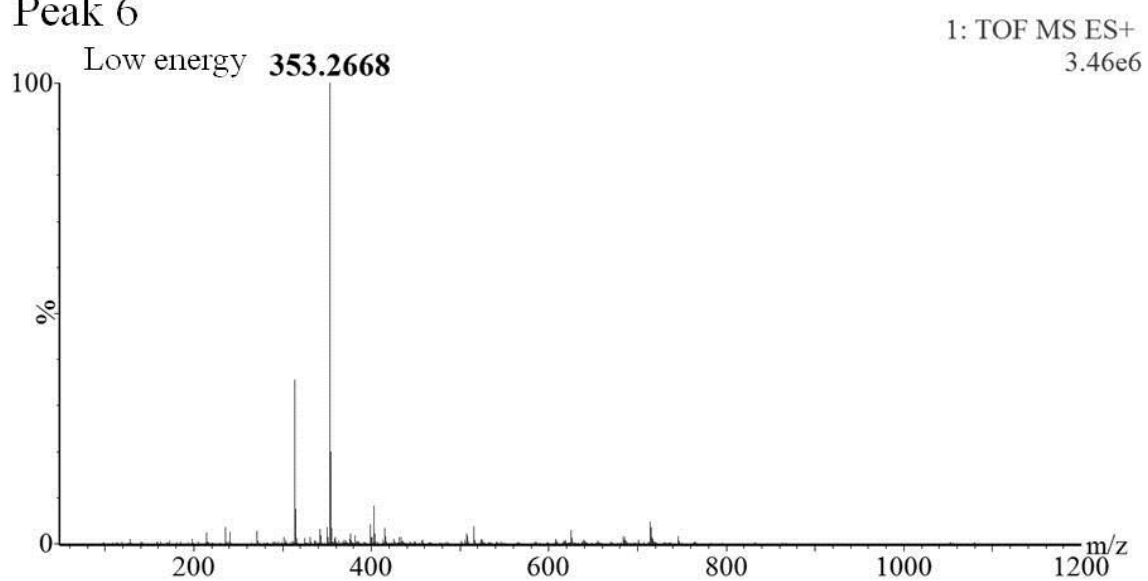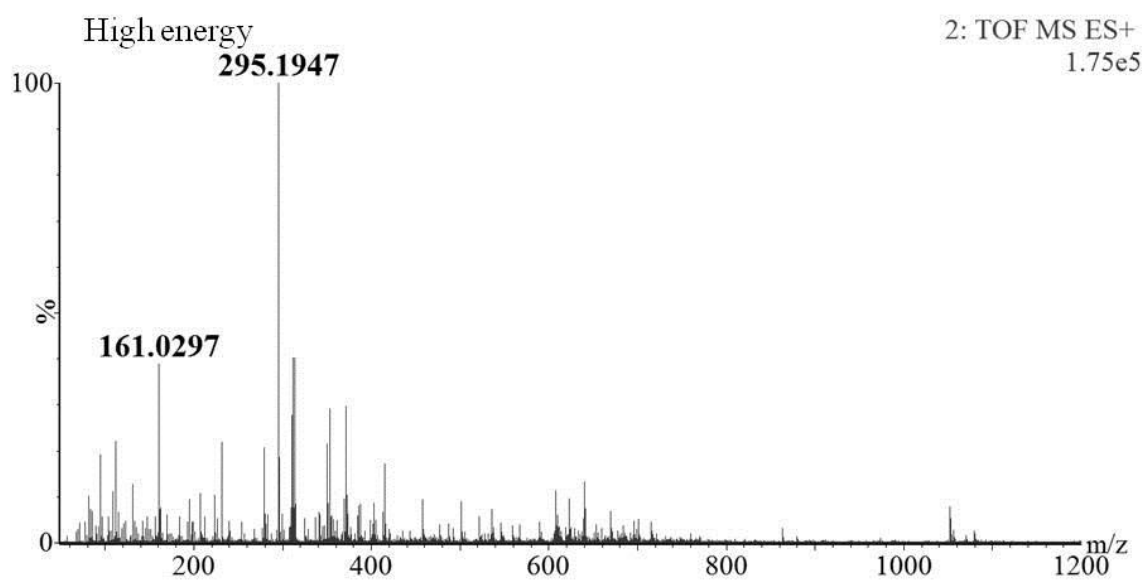

Figure S2. Cont.

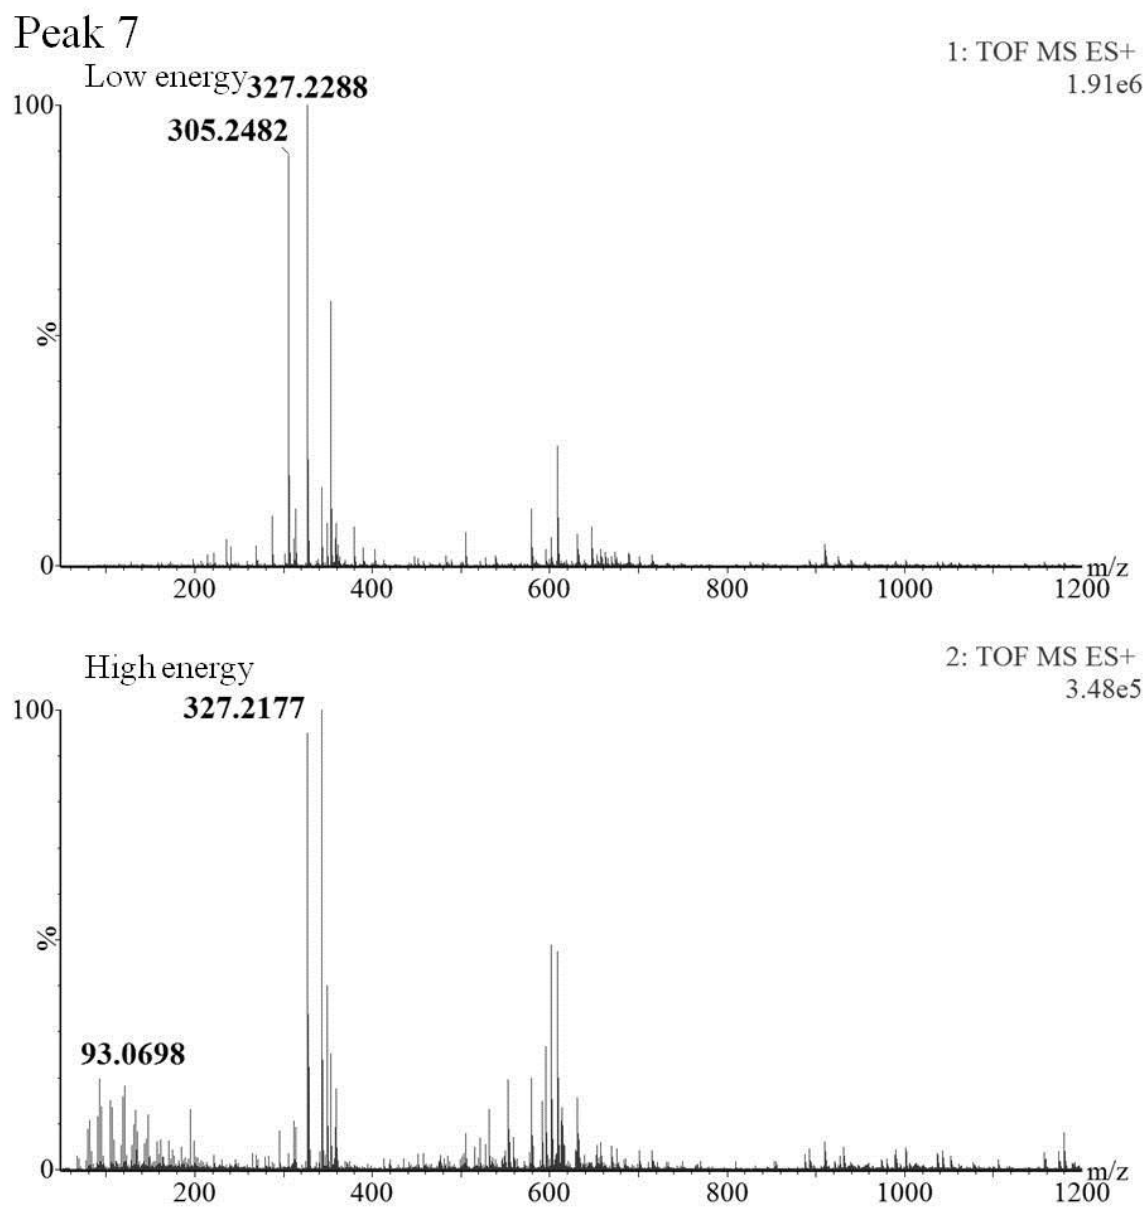

Figure S2. Cont.

## Peak 8

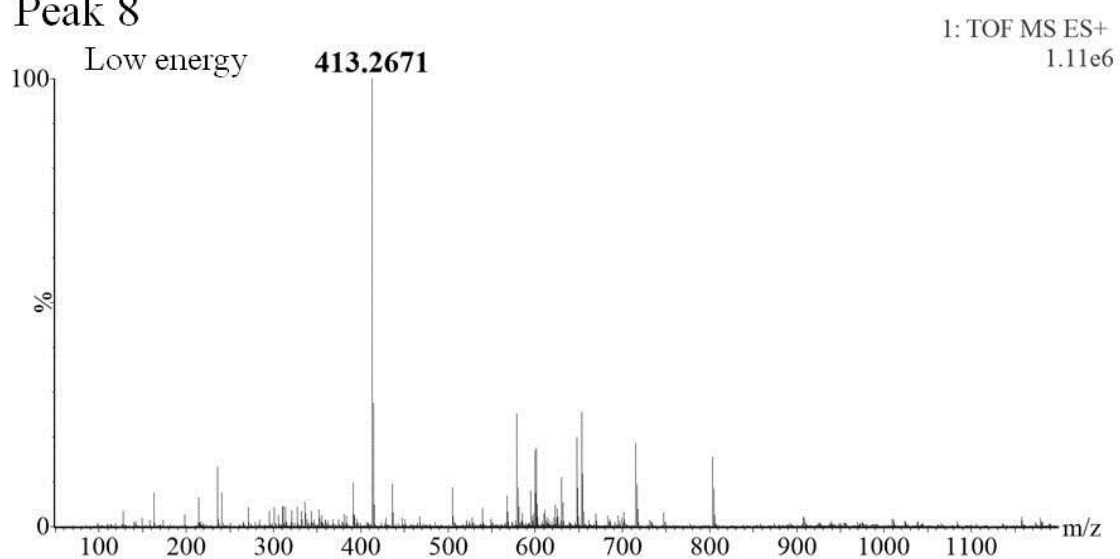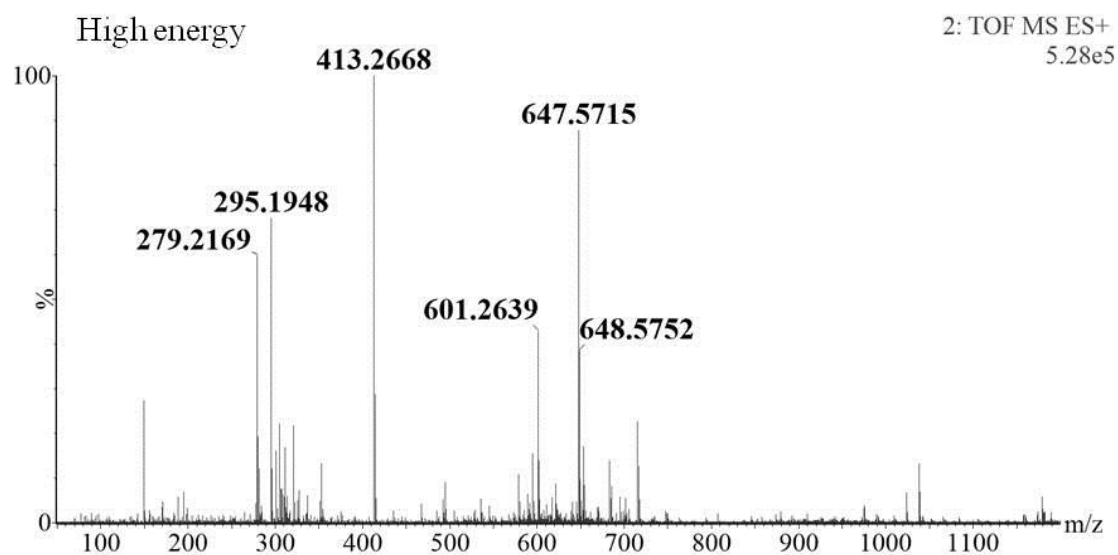

Figure S2. Cont.

## Peak 10

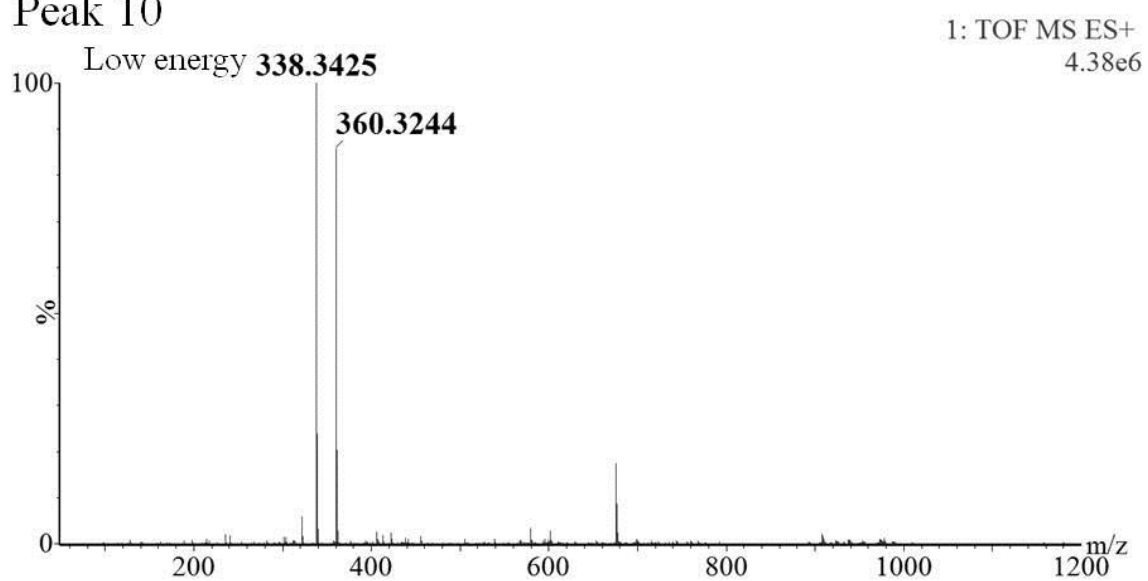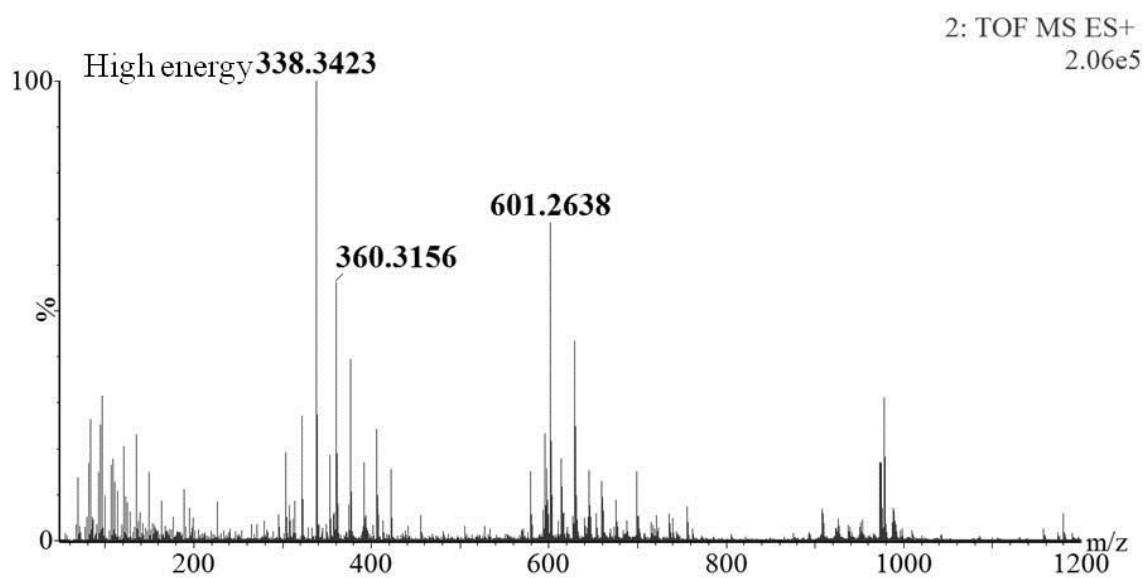

Figure S2. Cont.

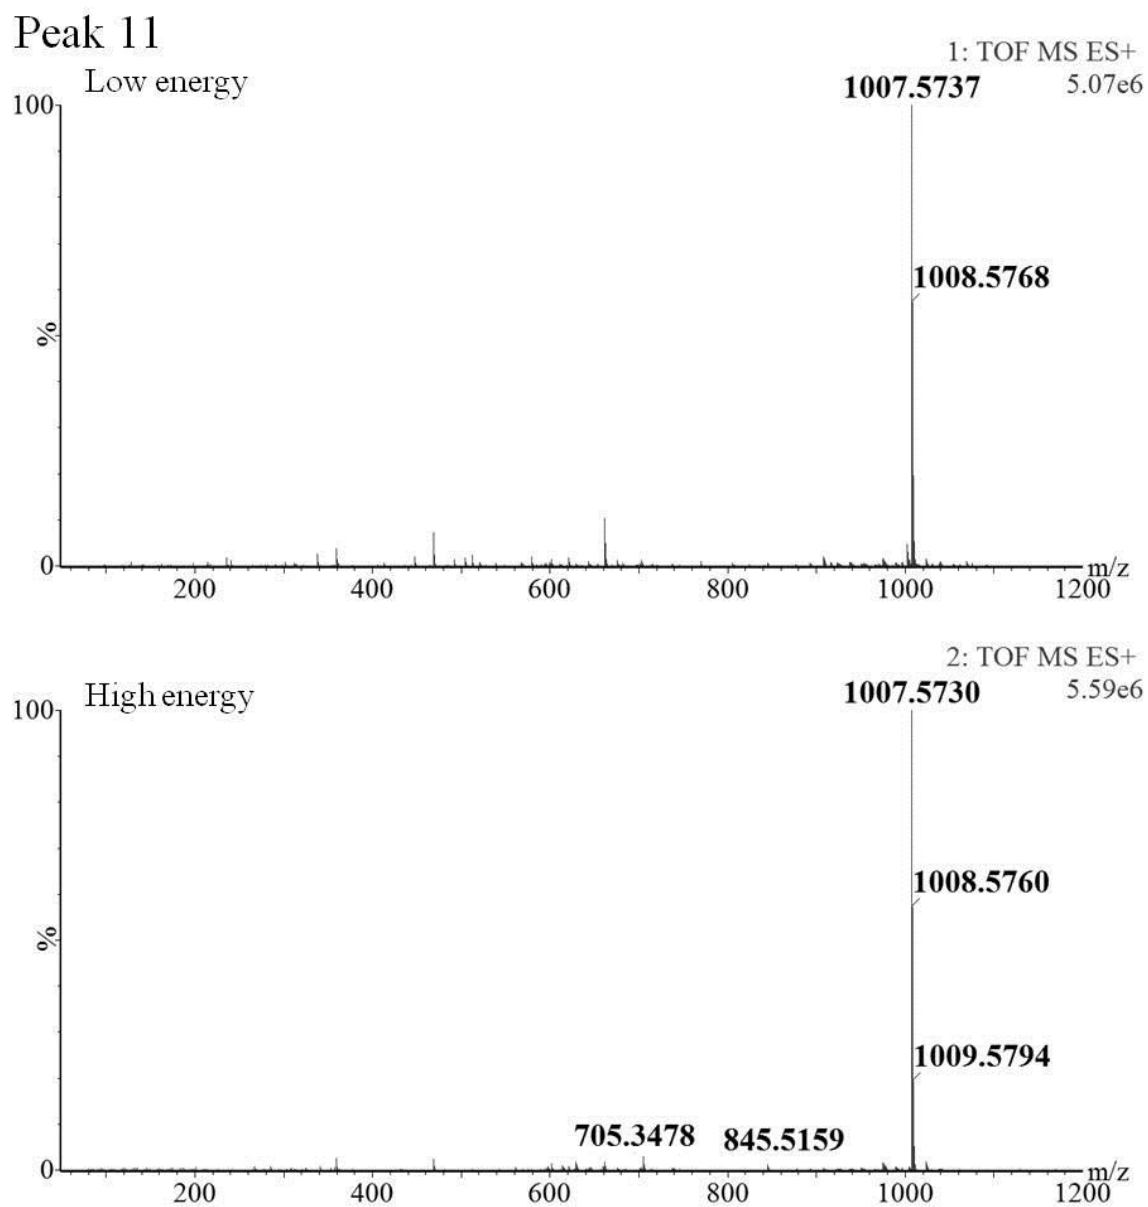

Figure S2. Cont.

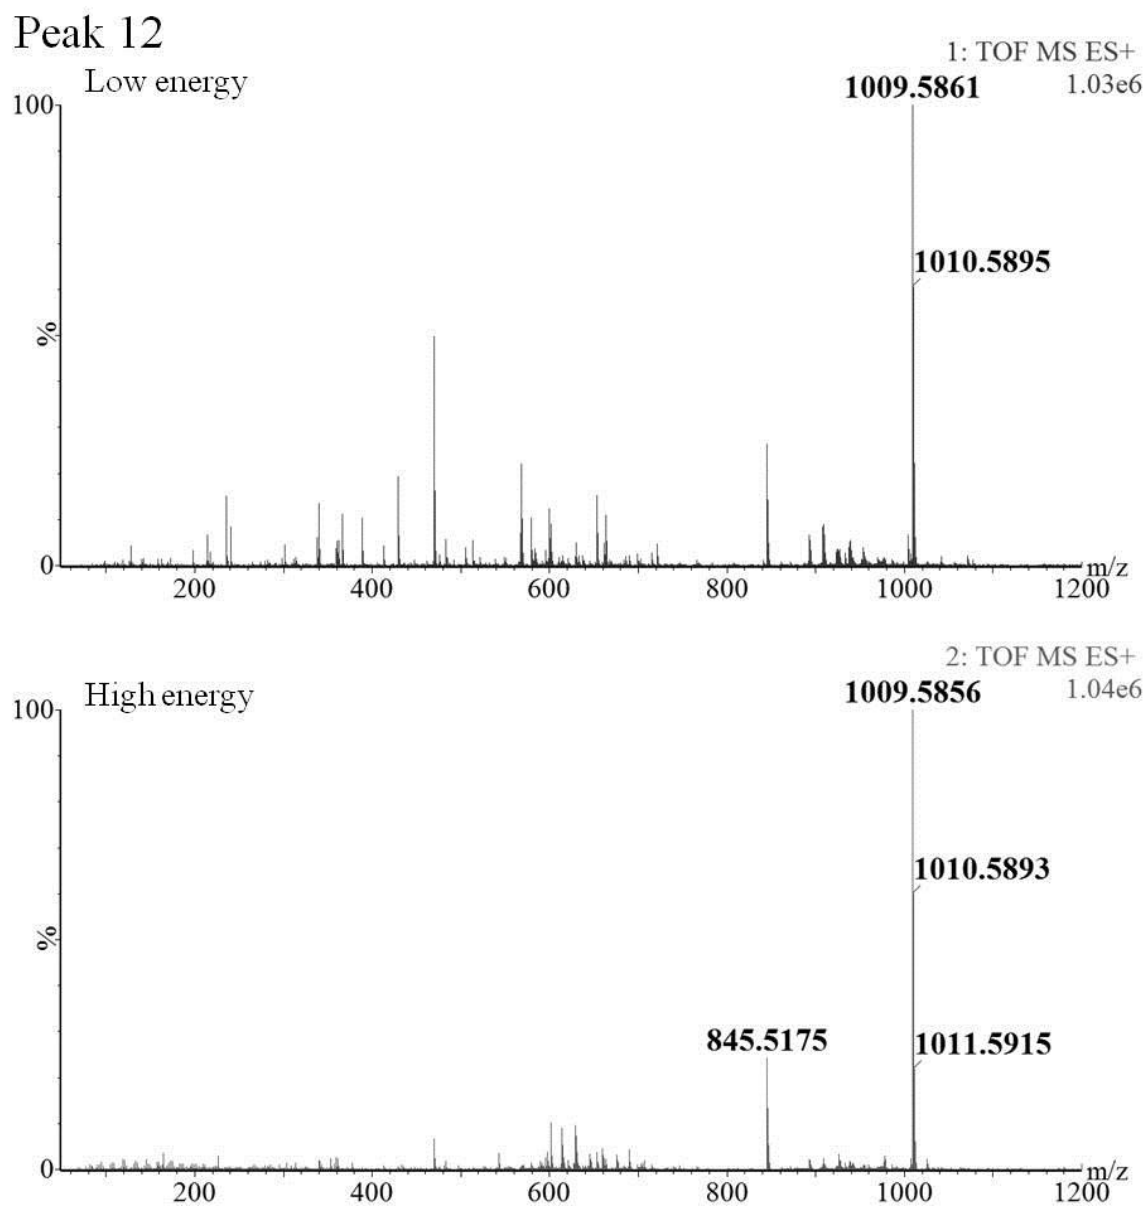

Figure S2. Cont.

## Peak 13

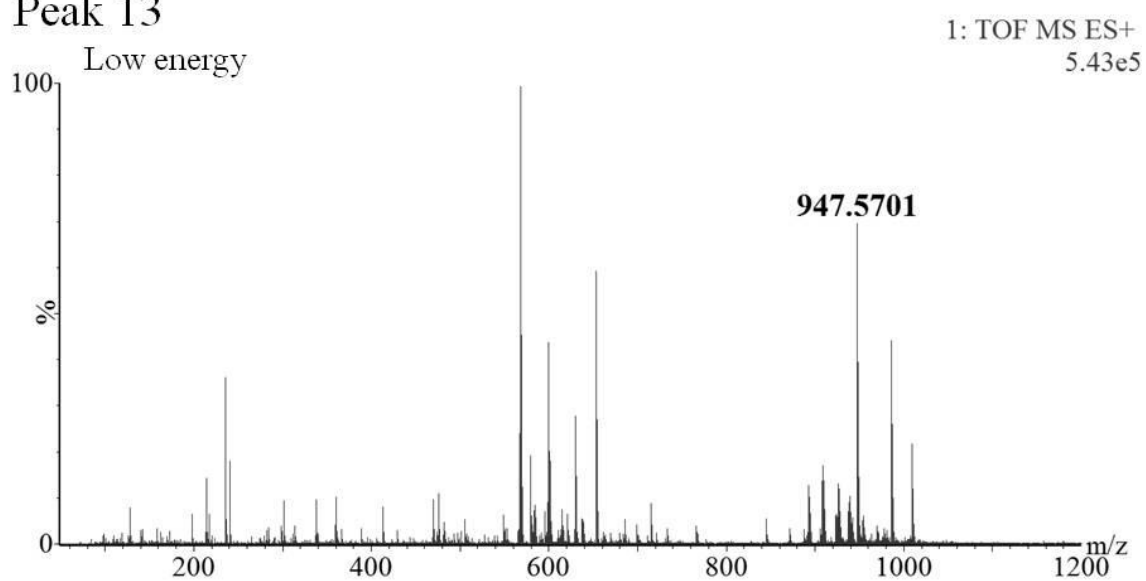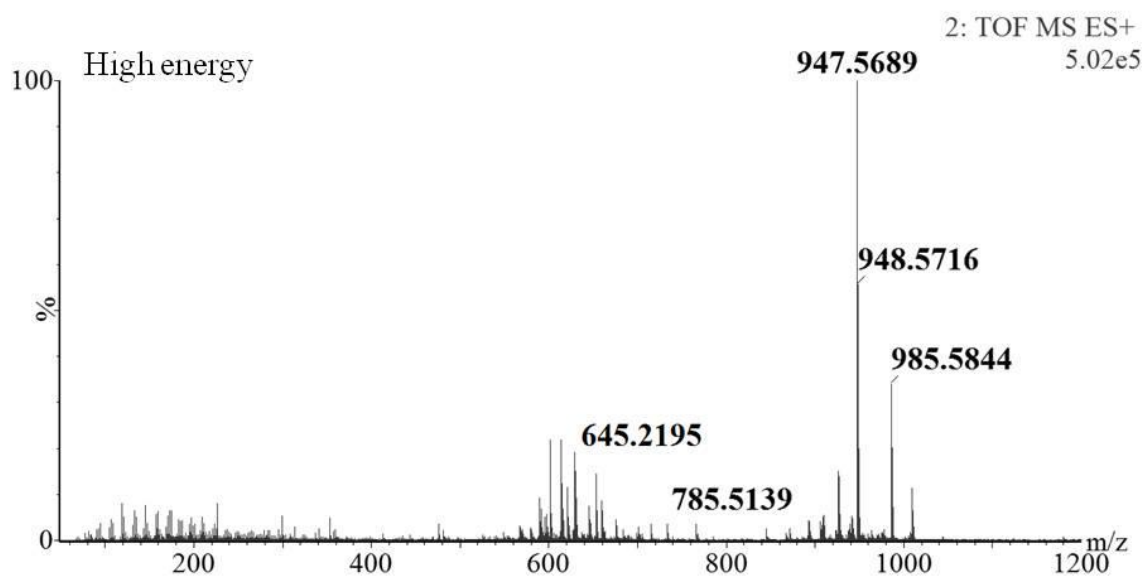

Figure S2. Cont.

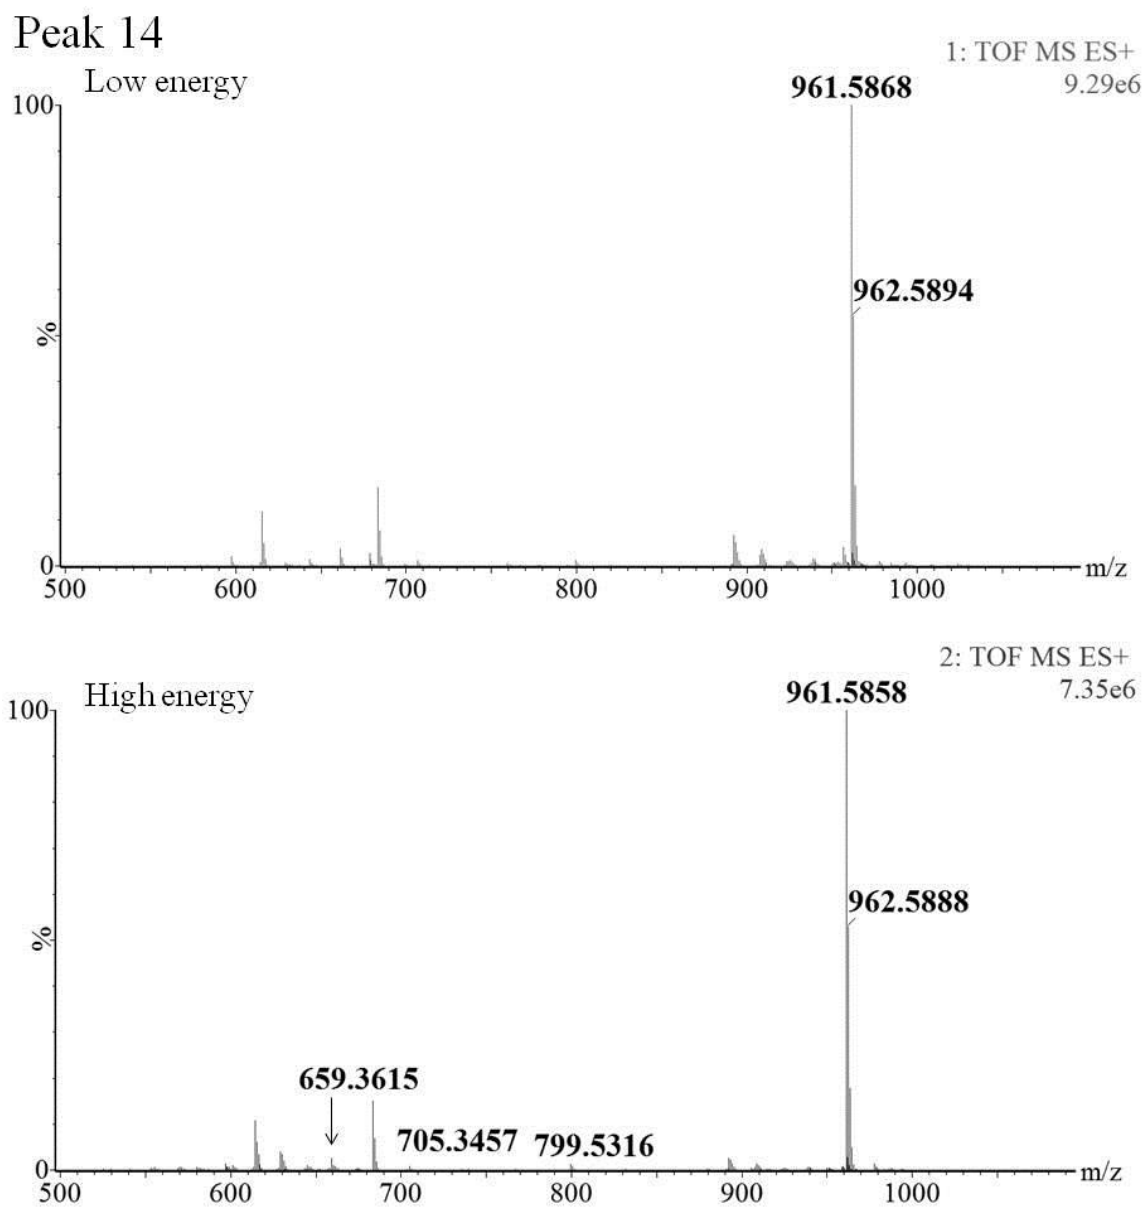

Figure S2. Cont.

## Peak 15

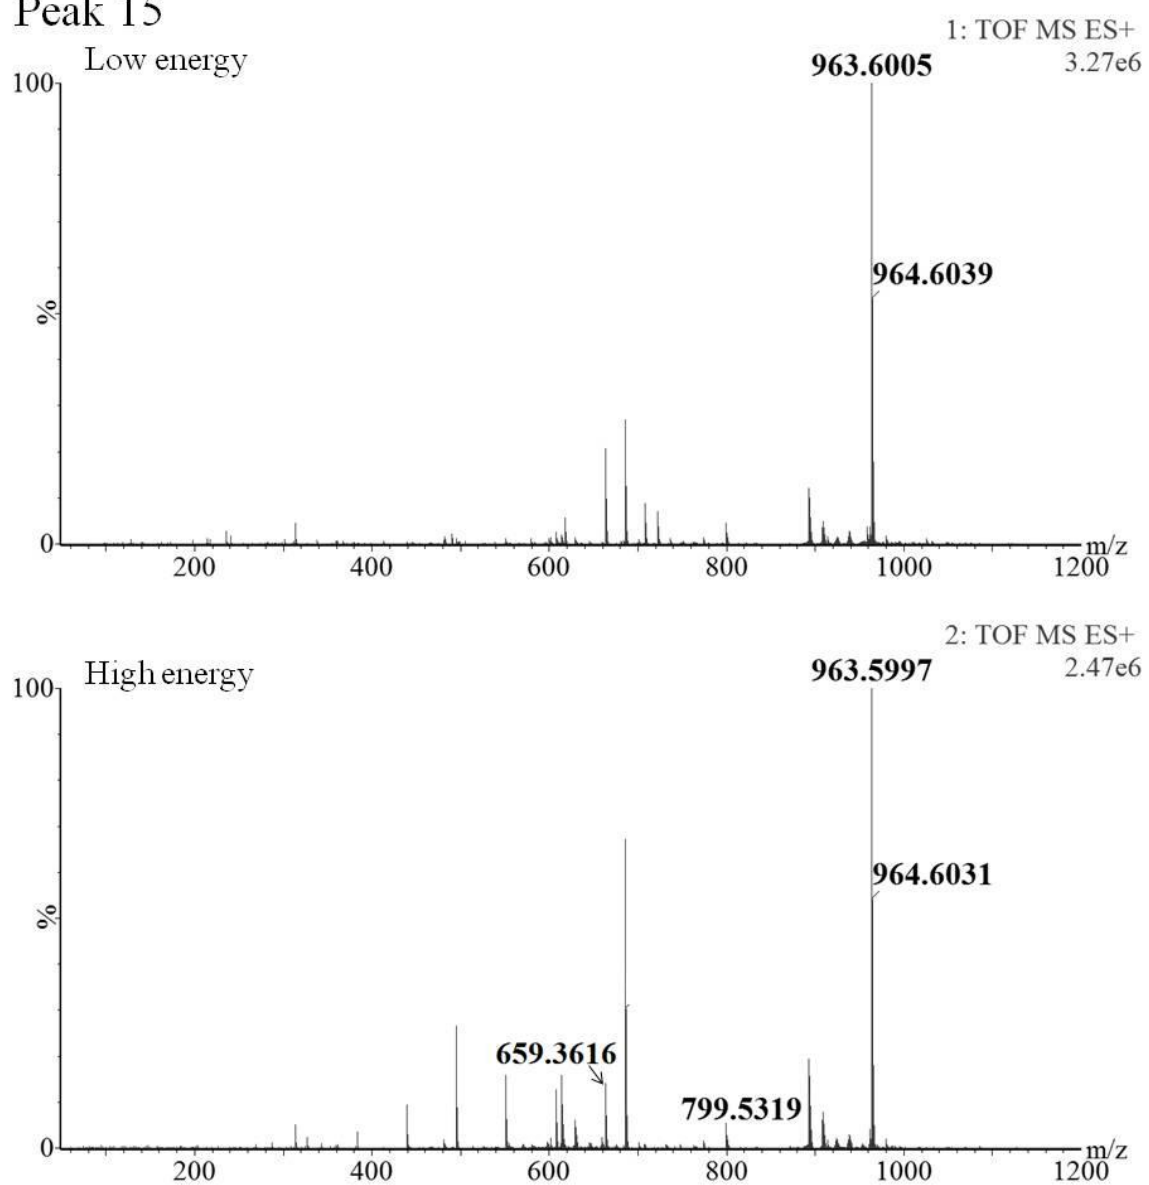

Figure S2. Cont.

## Peak 16

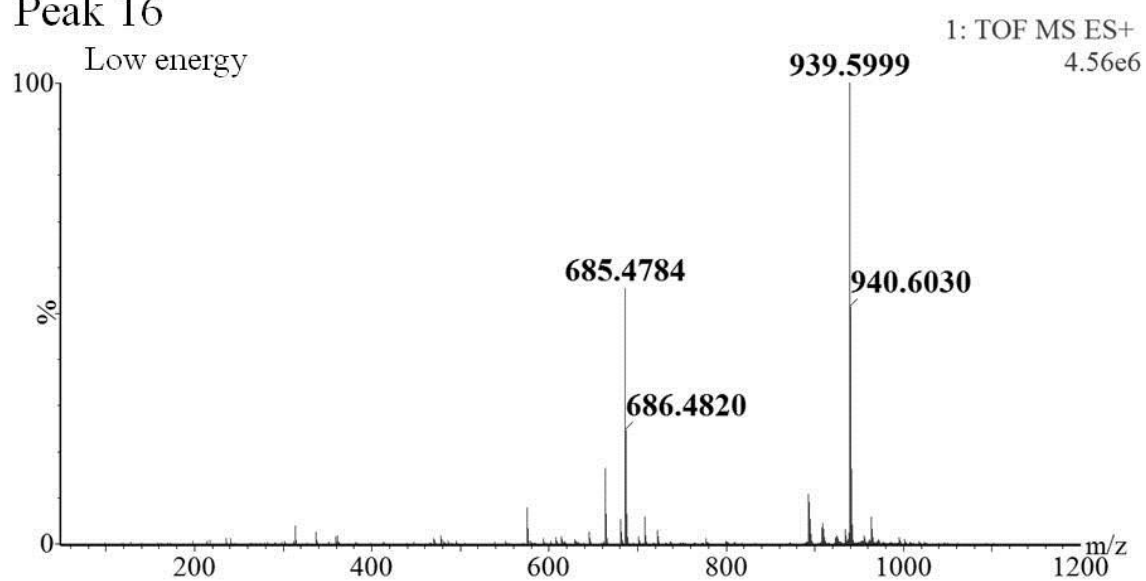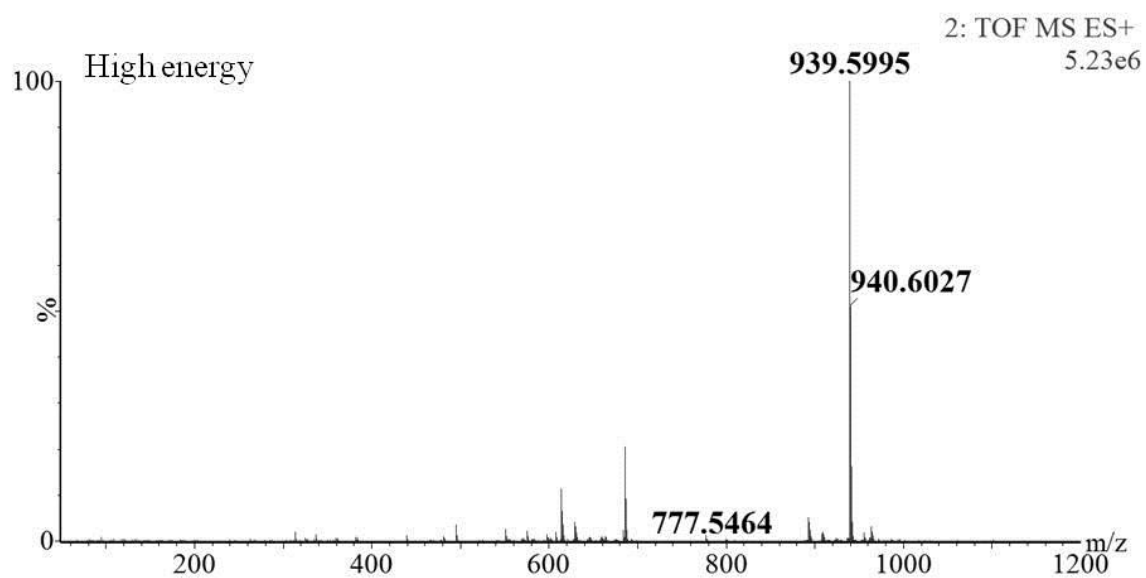

Figure S2. Cont.

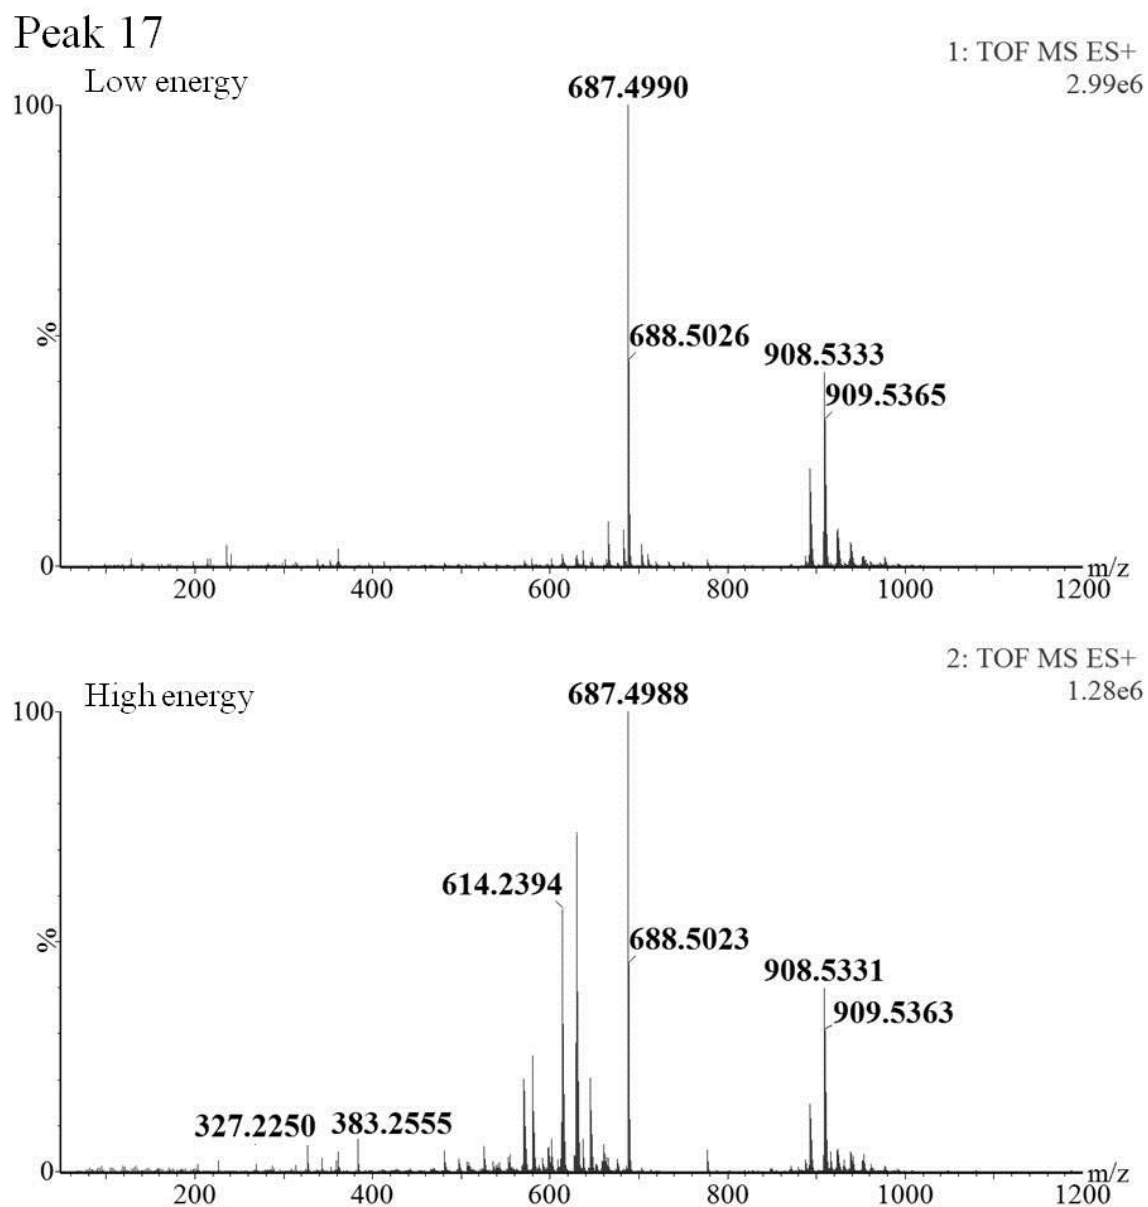

Figure S2. Cont.

## Peak 18

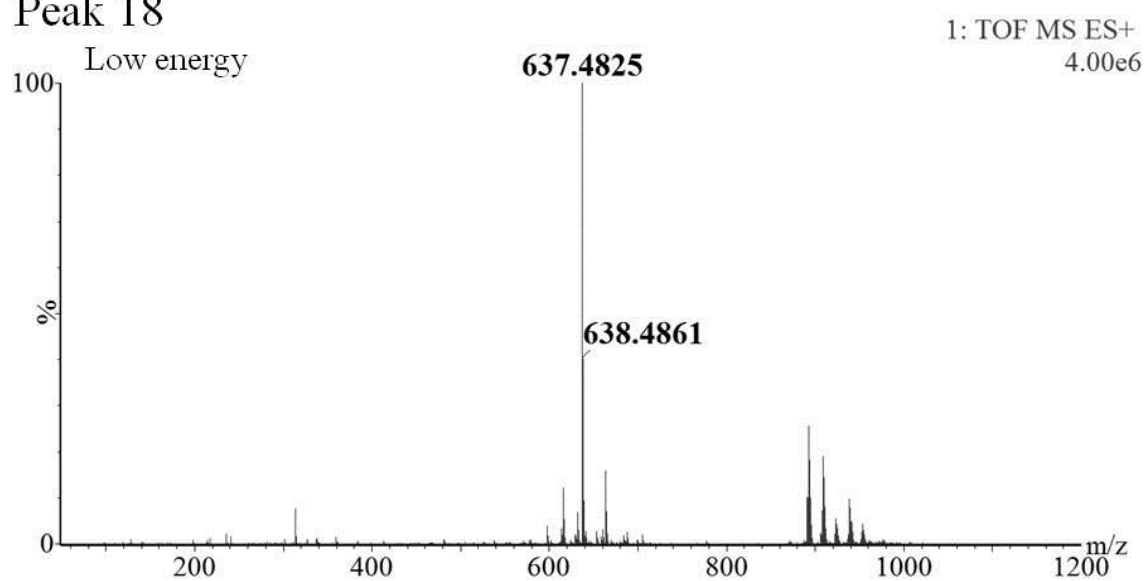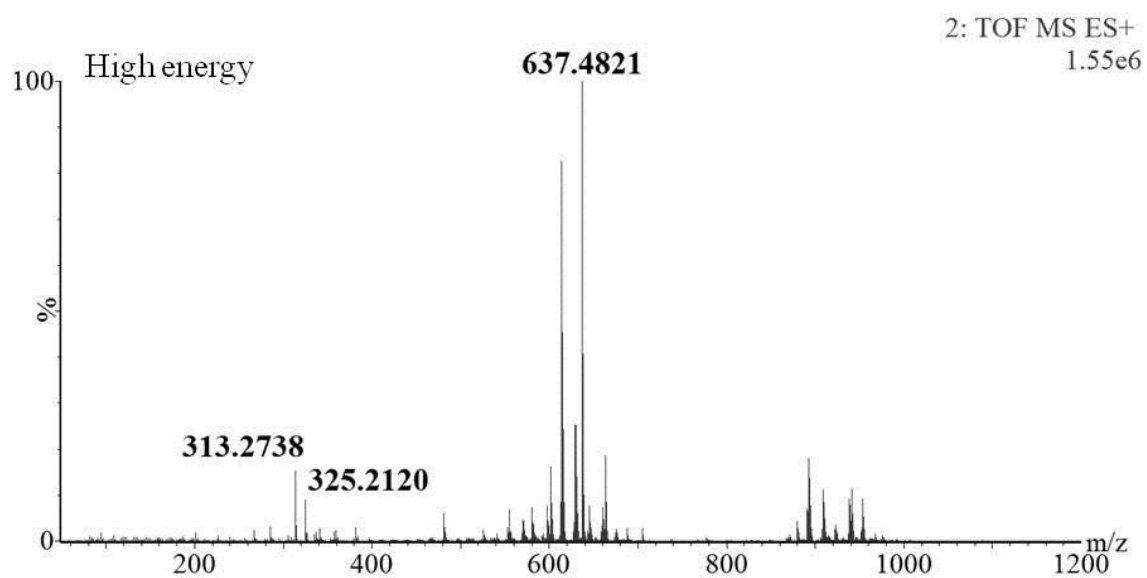

Figure S2. Cont.

## Peak 21

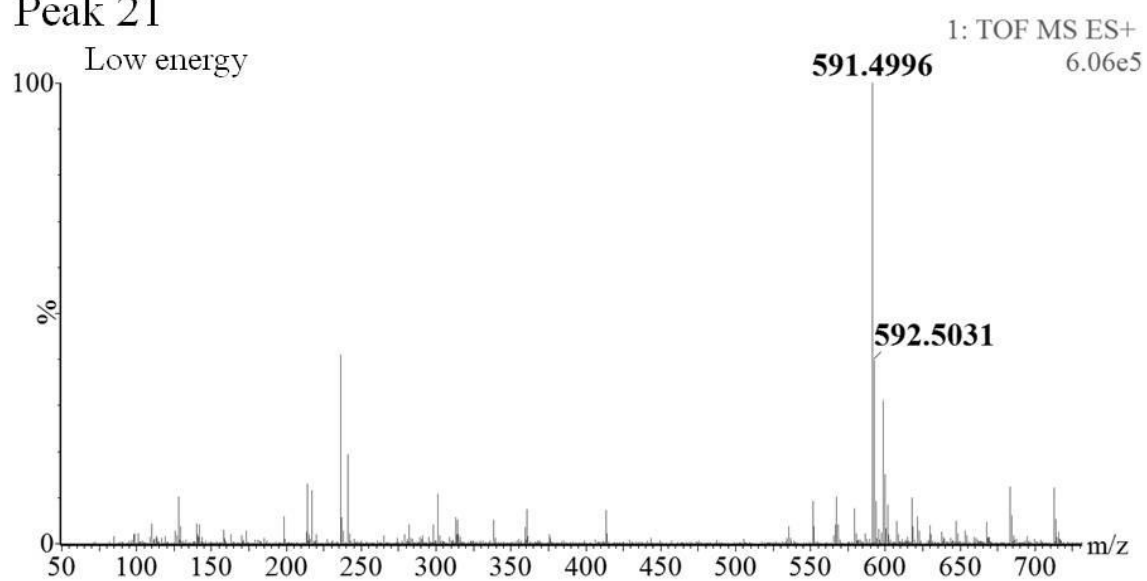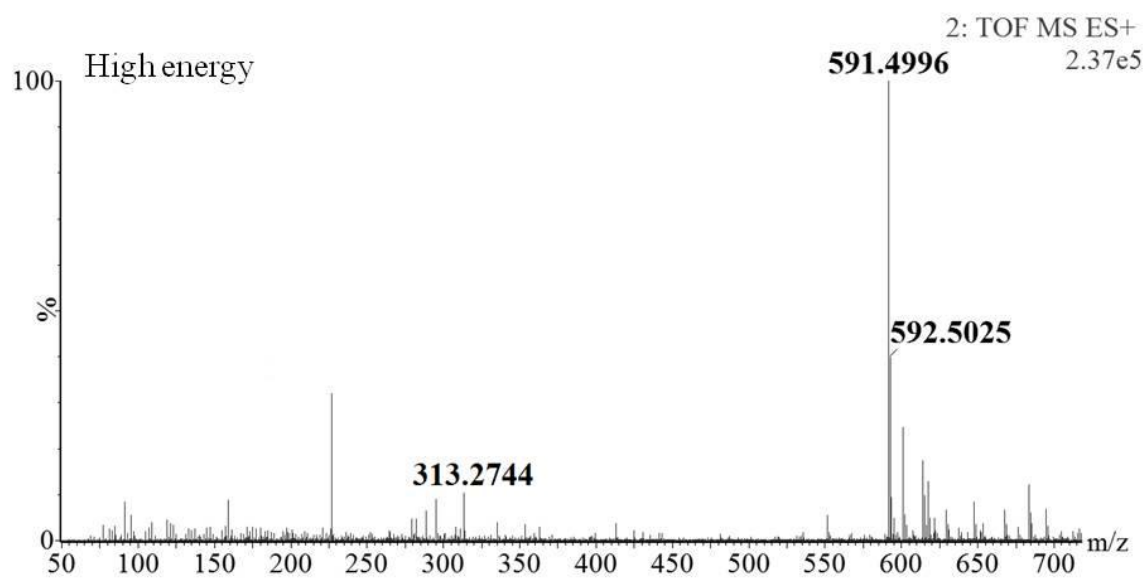

Figure S2. Cont.

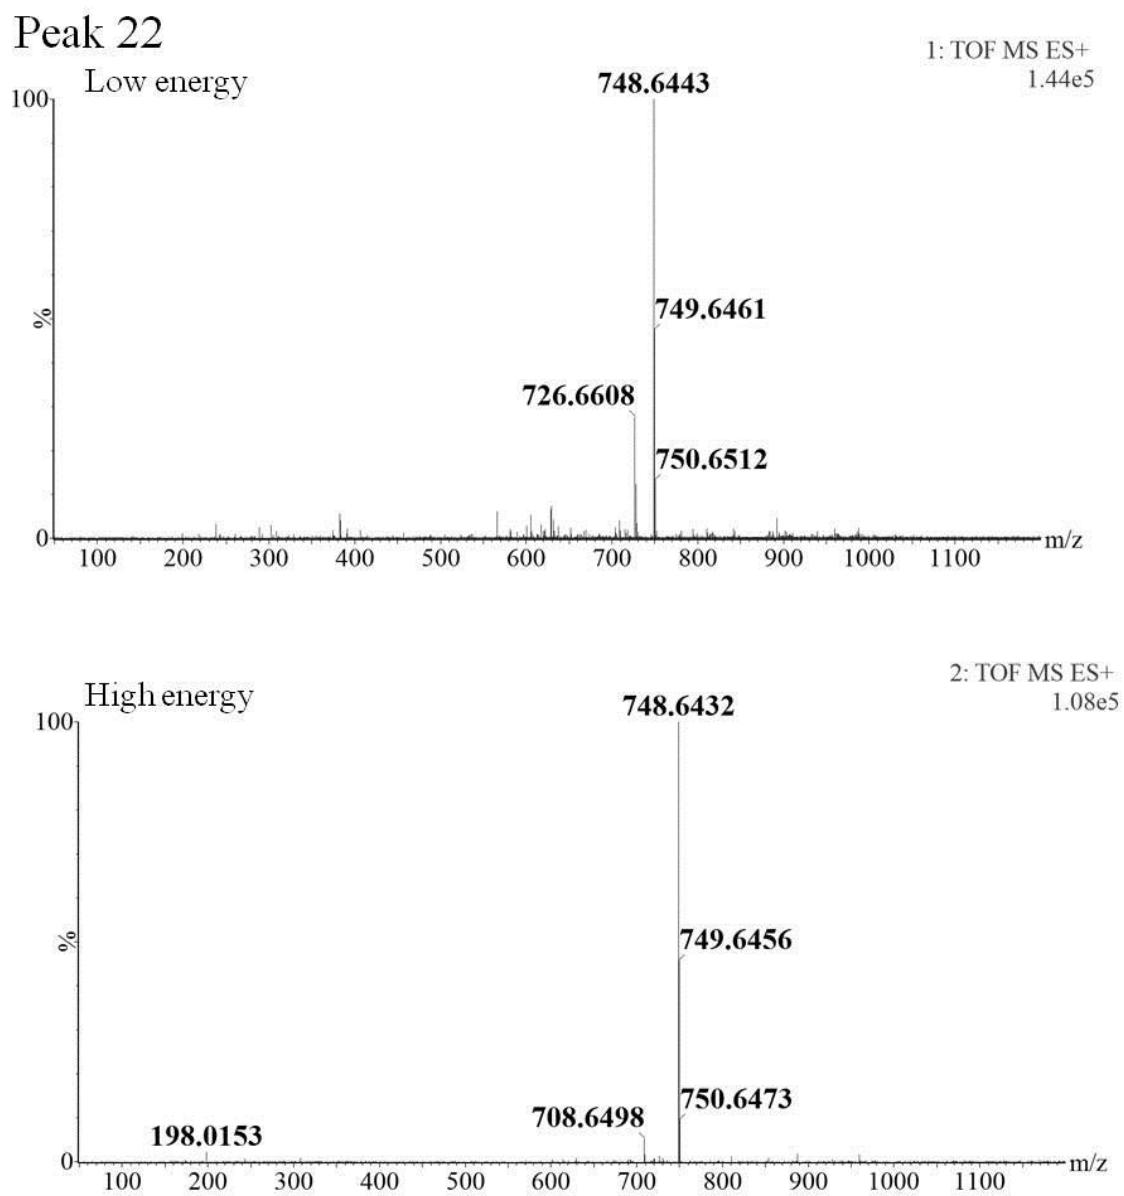

Figure S2. Cont.

## Peak 23

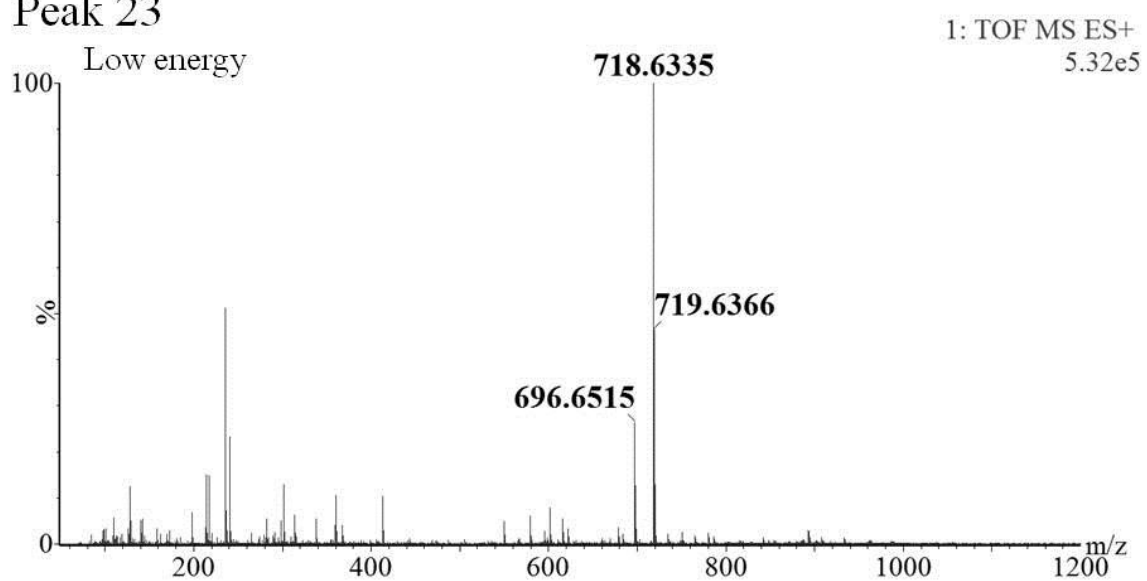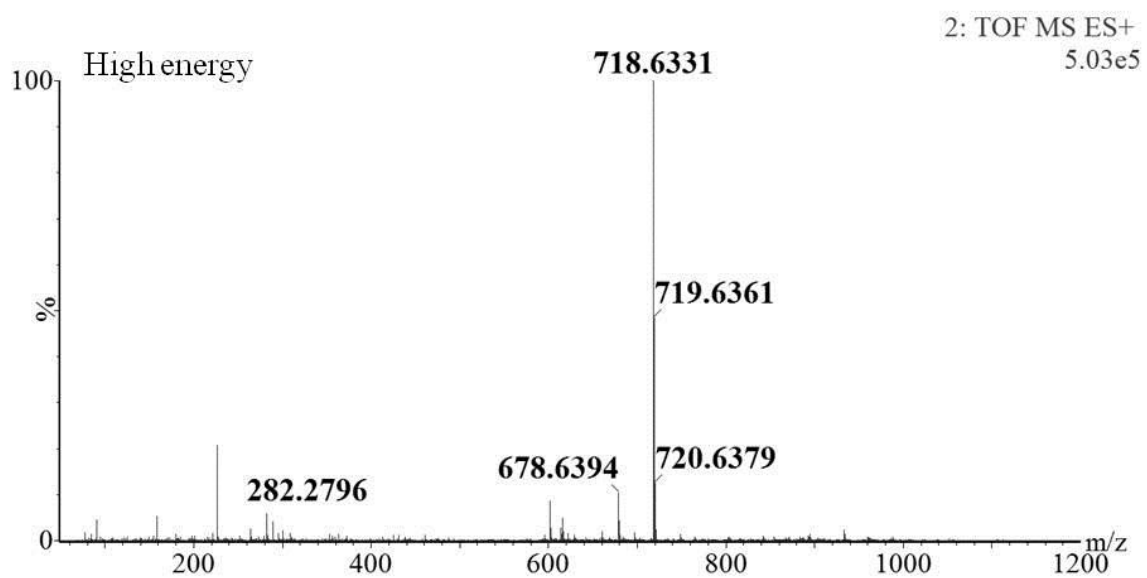

Figure S2. Cont.

## Peak 24

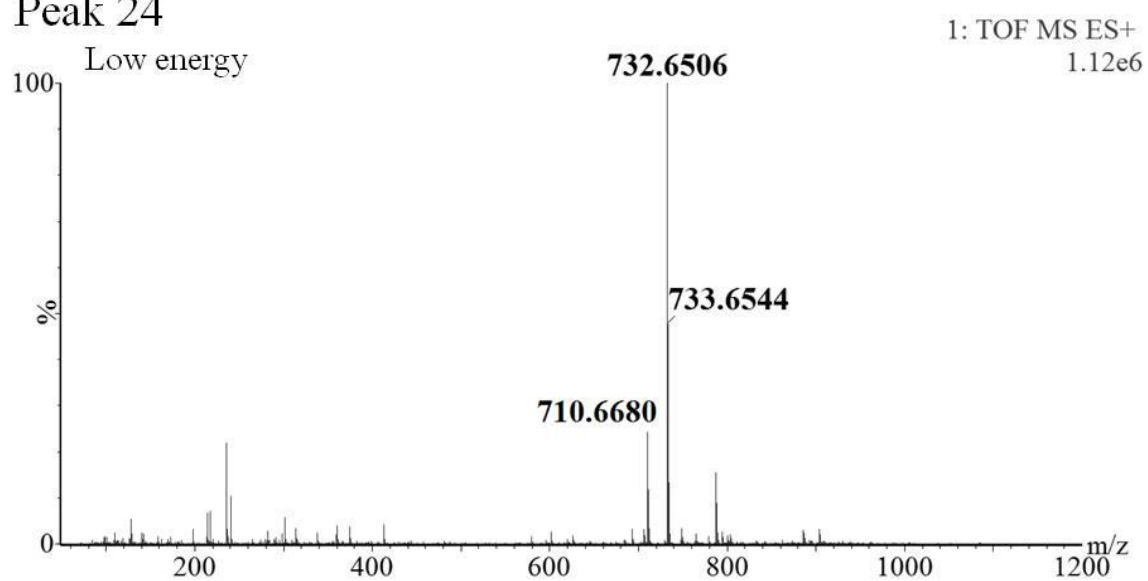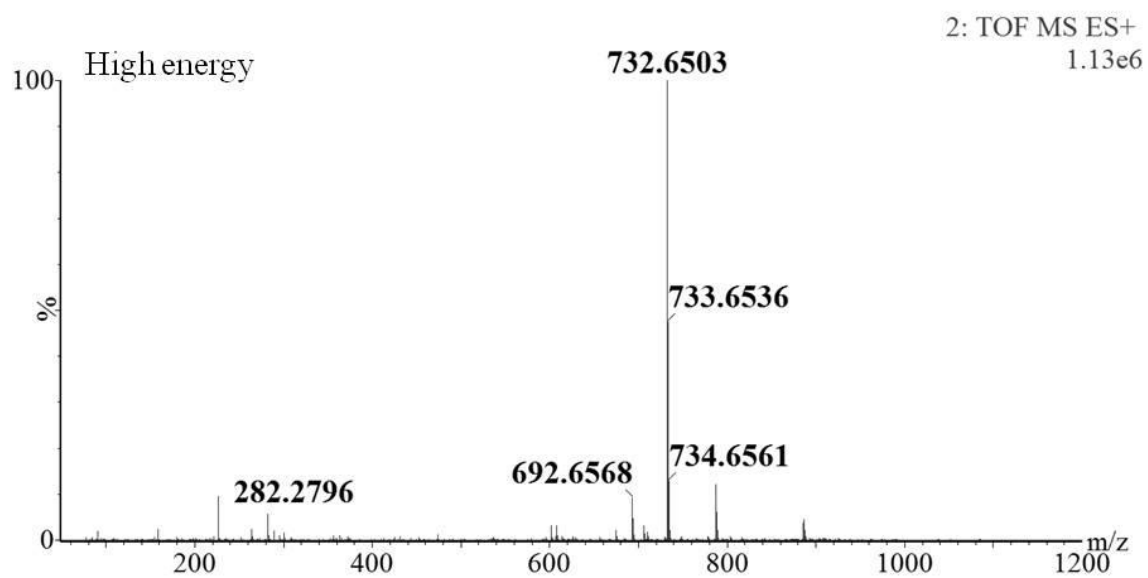

Figure S2. Cont.

## Peak 28

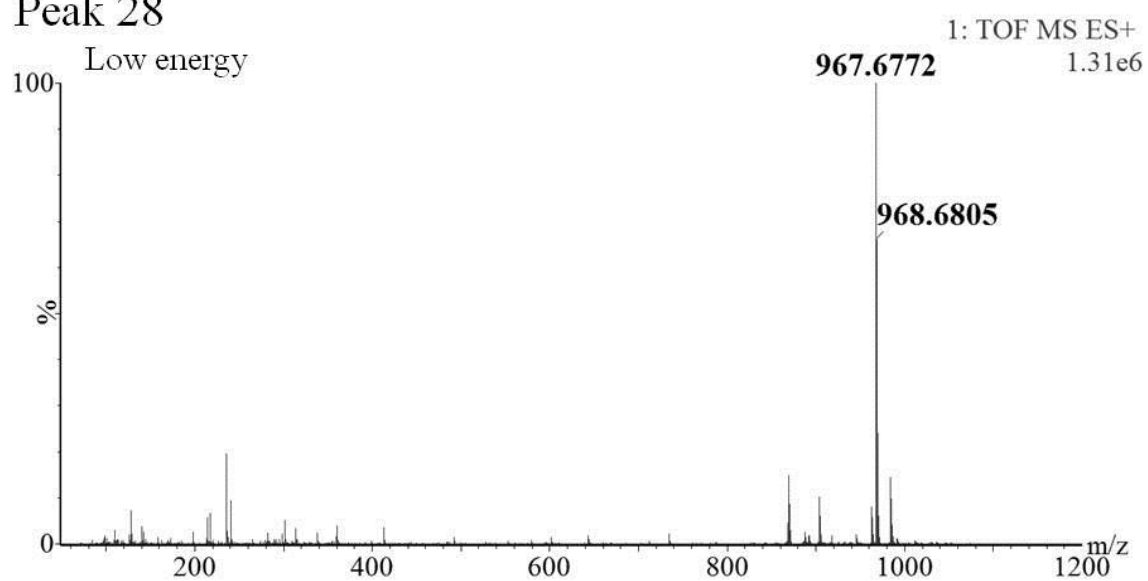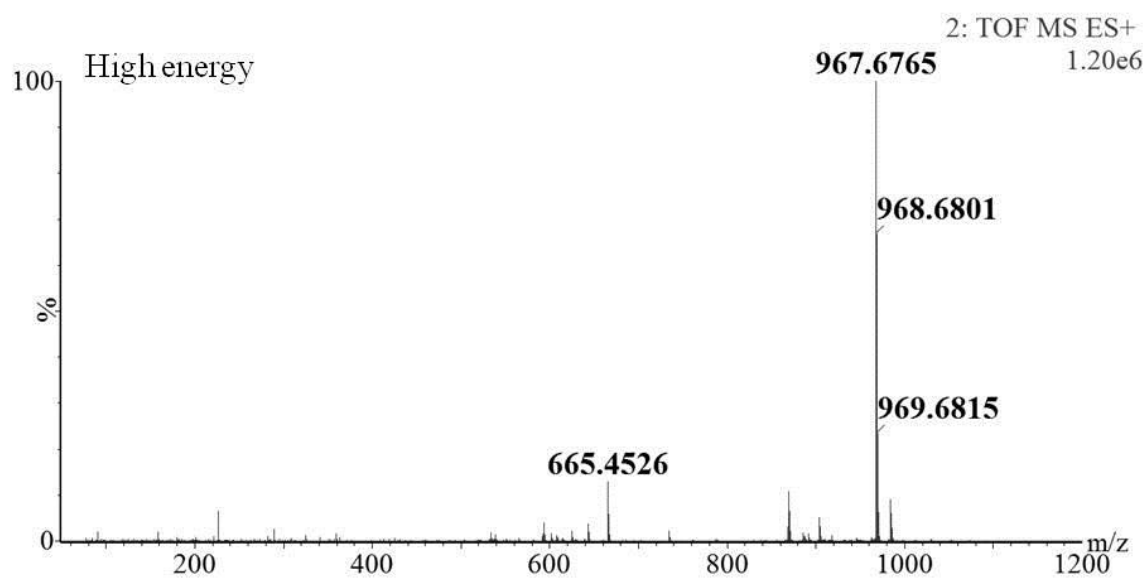

Figure S2. Cont.

## Peak 31

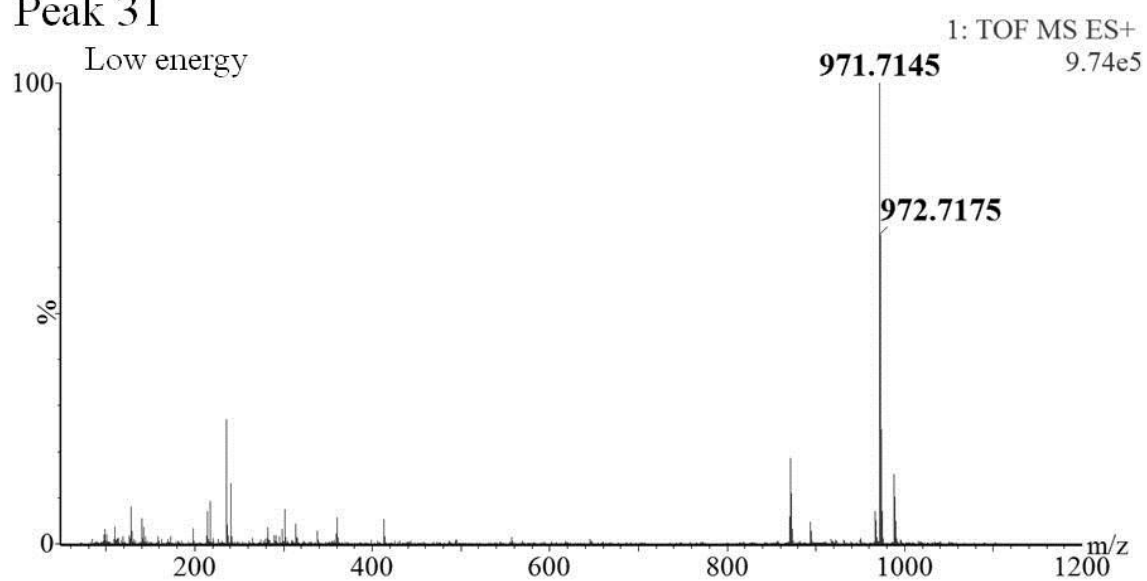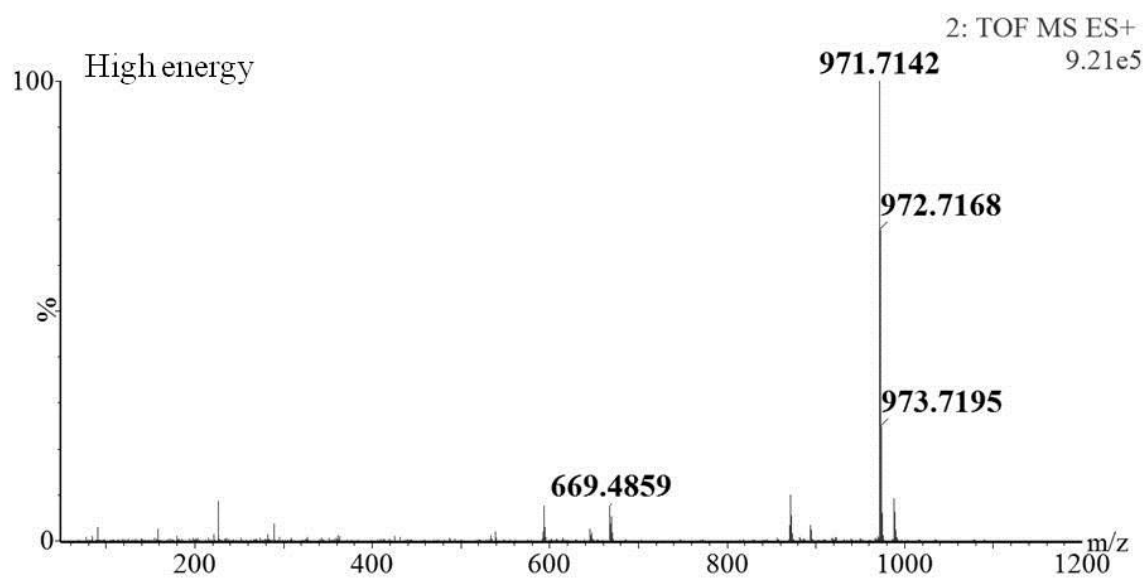

Figure S2. Cont.

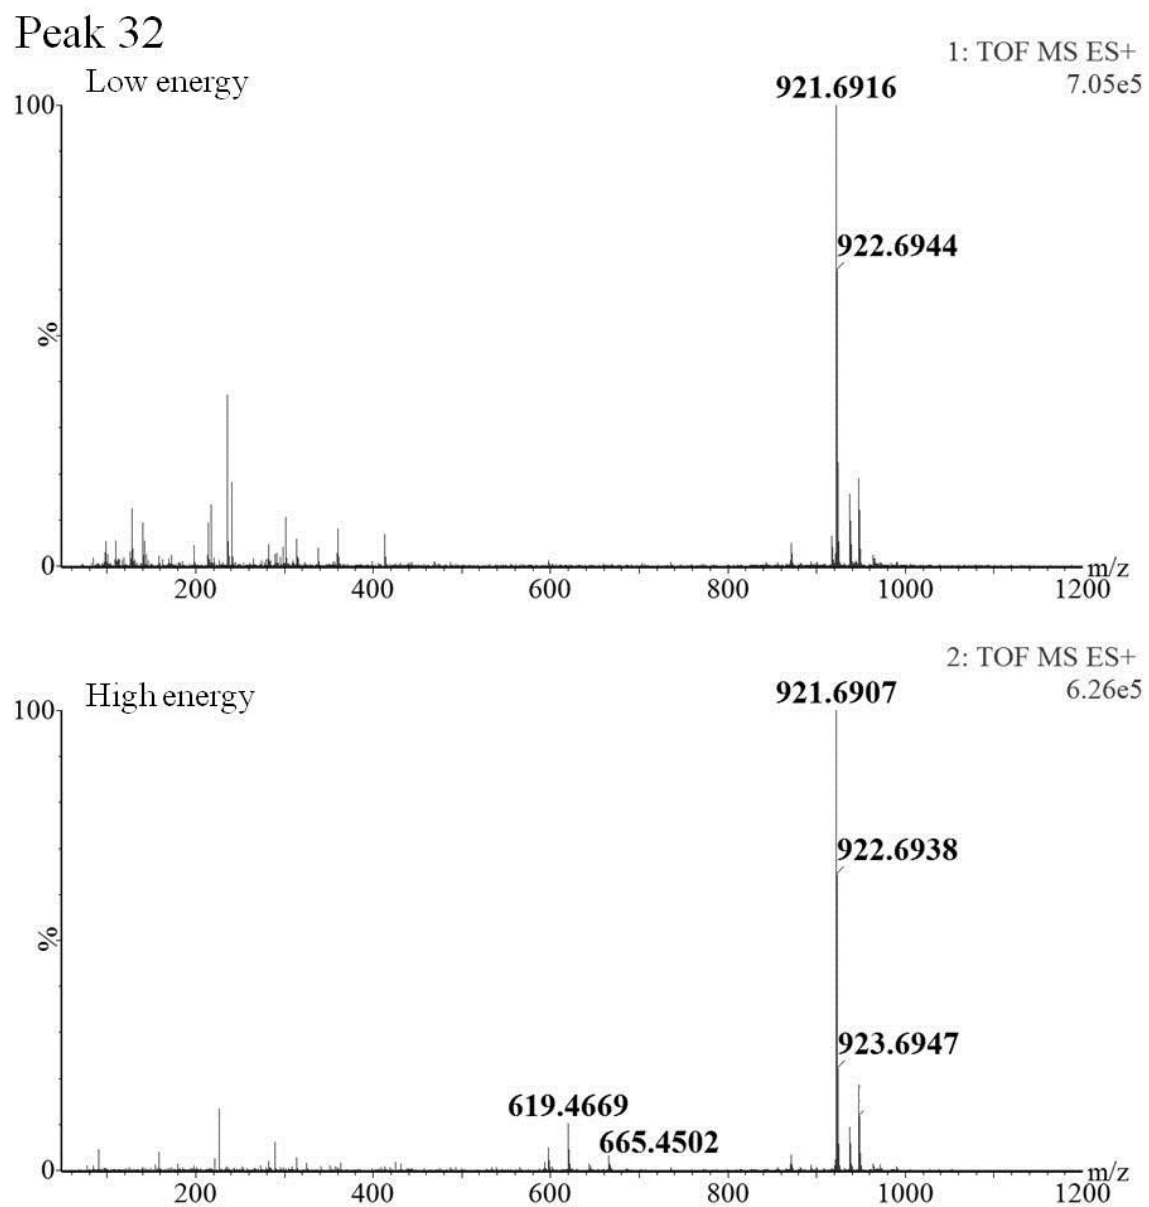

Figure S2. Cont.

## Peak 33

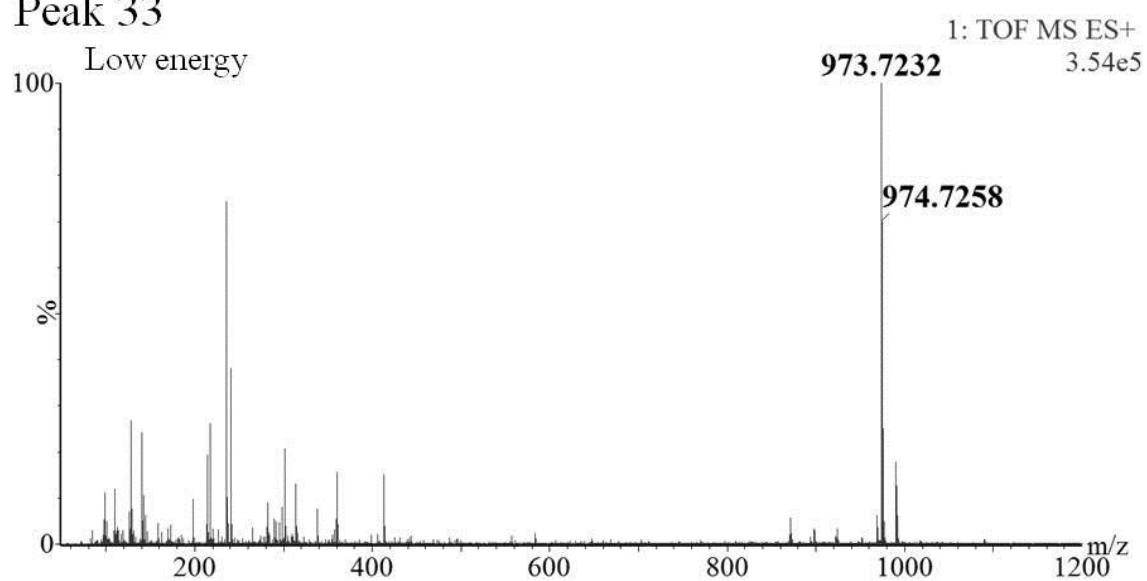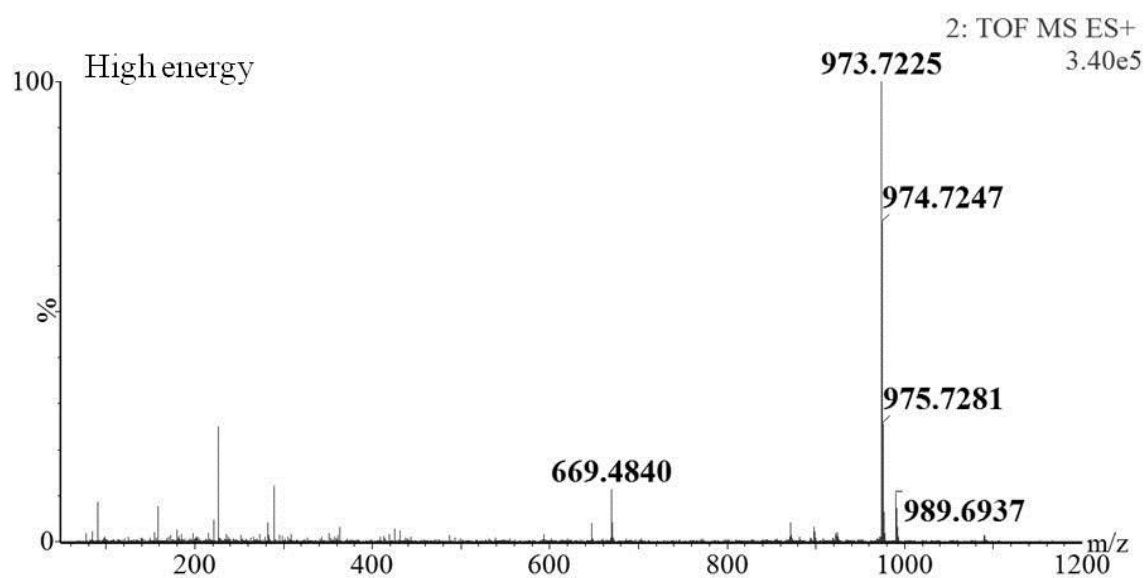

Figure S2. Cont.

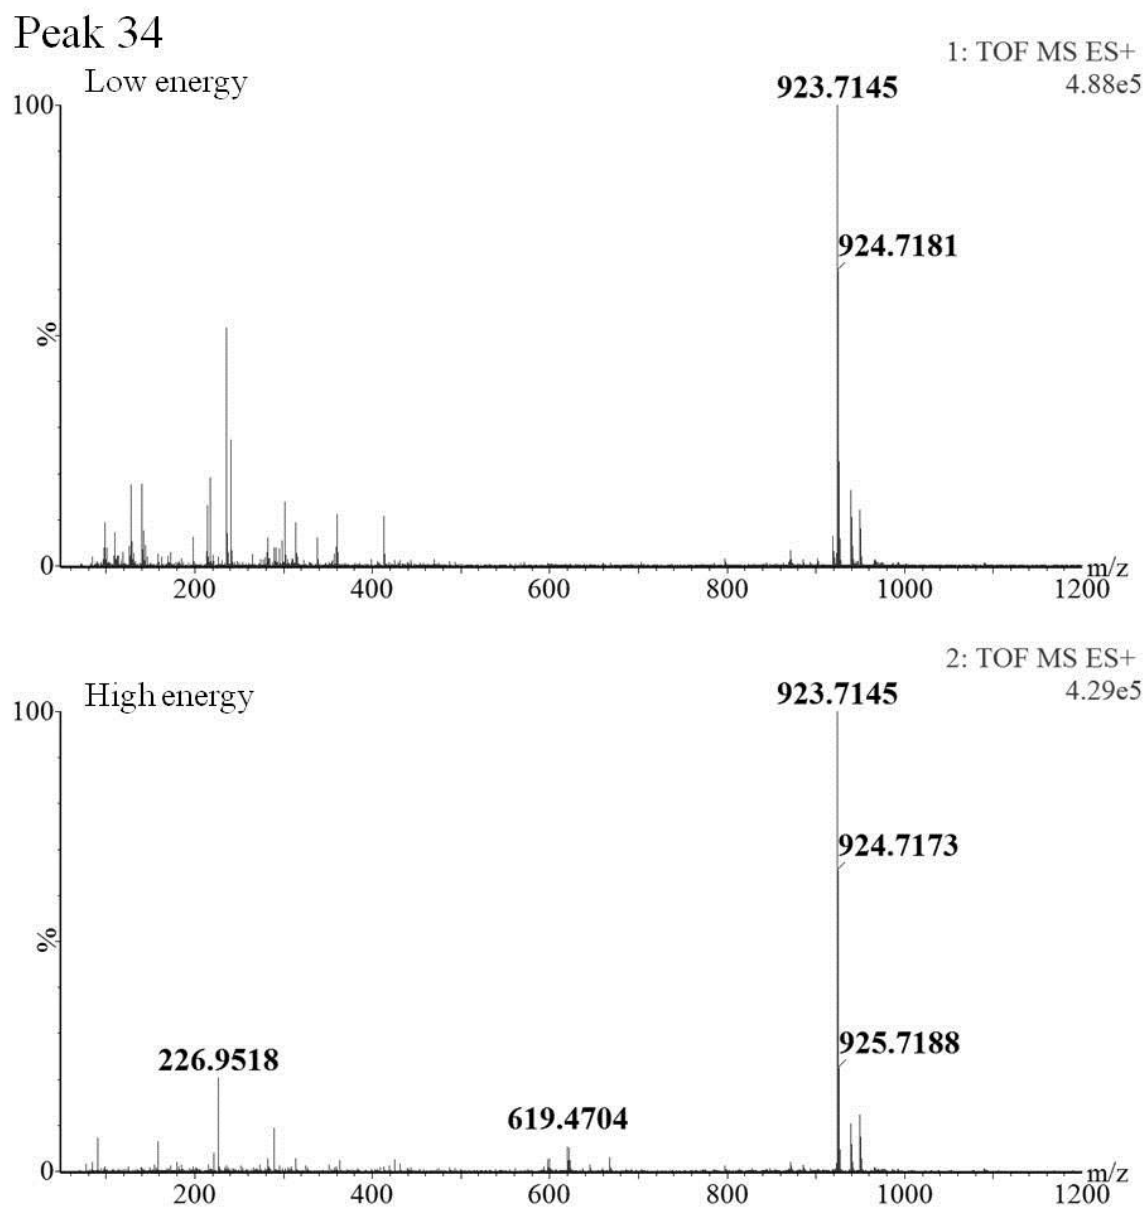

Figure S2. Cont.

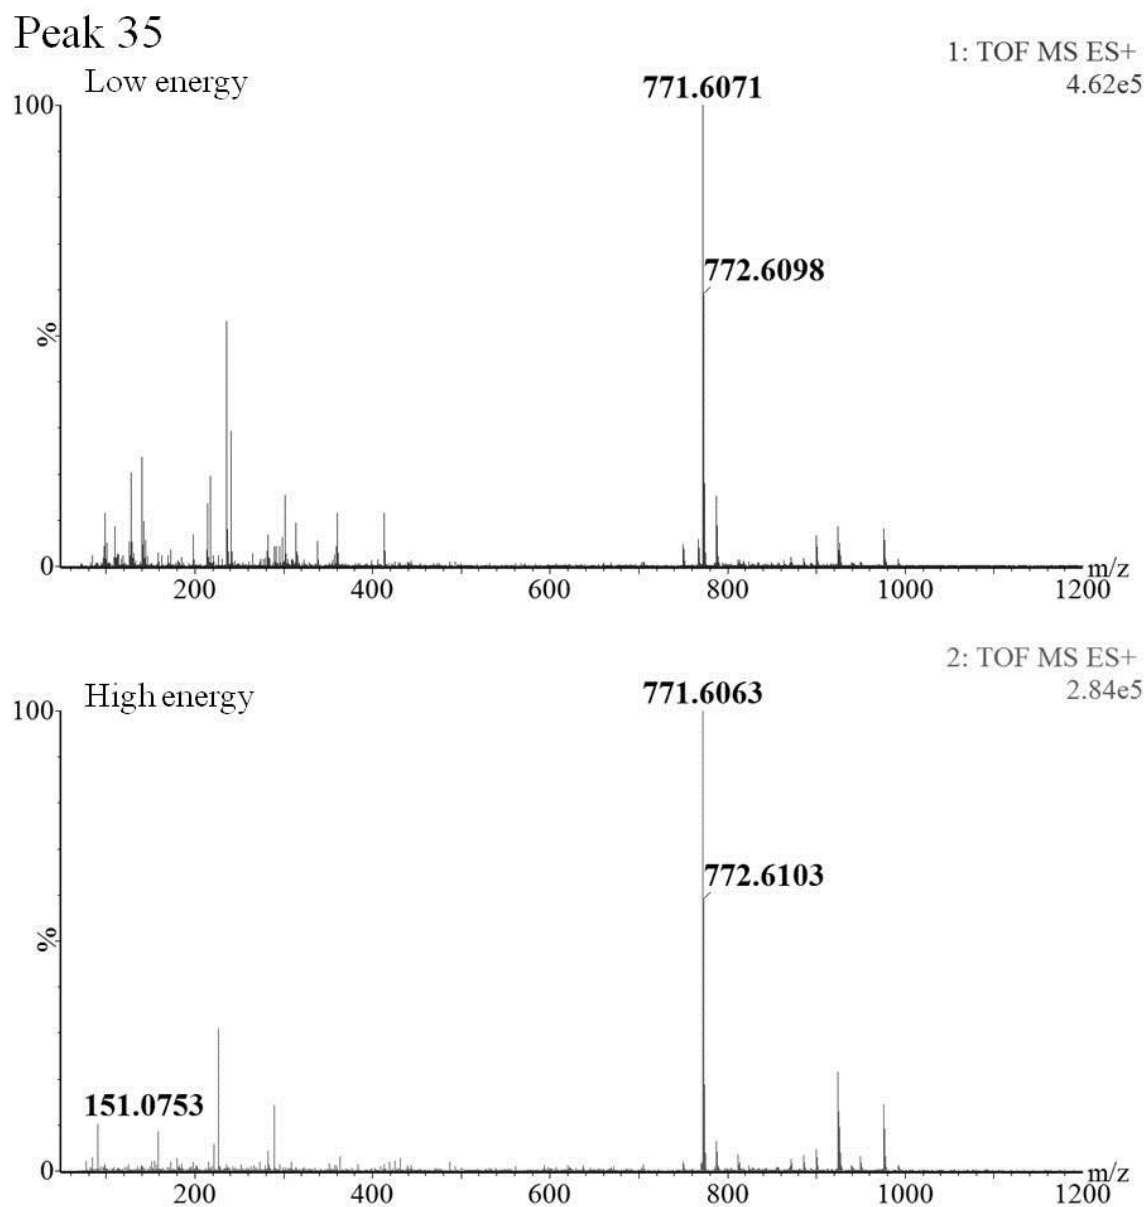

**Figure S2.** High resolution MS<sup>E</sup> spectra of unidentified ions in the *Pp* ethanol extract.
